# Supplementary material for: Palladium-catalyzed δ-selective reductive Heck reaction of alkenyl carbonyl compounds with aryl iodides and bromides
Source: Royal Society of Chemistry journal article supplement (doi:10.1039/d0qo00428f), 2020-01-01

# Palladium-catalyzed $\delta$ -selective reductive Heck reaction of alkenyl carbonyl compounds with aryl iodides and bromides

Yang Li, Jun-Fang Gong\* and Mao-Ping Song\*

*College of Chemistry, Henan Key Laboratory of Chemical Biology and Organic Chemistry,  
Green Catalysis Center, Zhengzhou University, Zhengzhou 450001, People's Republic of  
China*

*E-mail: gongjf@zzu.edu.cn (J.-F. Gong) or mpsong@zzu.edu.cn (M.-P. Song).*

## Table of Contents

|                                                               |     |
|---------------------------------------------------------------|-----|
| 1. General Information .....                                  | S2  |
| 2. Experimental Section .....                                 | S3  |
| 2.1 Optimization of Reaction Conditions .....                 | S3  |
| 2.2 Synthesis of Alkene Substrates .....                      | S8  |
| 2.3 Pd-catalyzed Intermolecular Reductive Heck Reaction ..... | S12 |
| 2.4 Scale-up Reaction and Removal of Directing Group .....    | S29 |
| 2.5 Studies on Mechanism .....                                | S30 |
| 2.6 Crystal Reports for <b>3ai</b> .....                      | S32 |
| 3. References .....                                           | S35 |
| 4. NMR Spectra.....                                           | S36 |

## 1. General Information

$^1\text{H}$  NMR,  $^{13}\text{C}$  NMR and  $^{19}\text{F}$  NMR spectra were recorded on a Bruker DPX 400 or Bruker DPX 600 instruments using tetramethylsilane as an internal standard. Signal multiplicities are represented by the following abbreviations: (s = singlet, d = doublet, t = triplet, q = quartet, m = multiplet, dd = doublet of doublet, dt = doublet of triplet), coupling constant ( $J$  values) in Hz and integration. HRMS was determined on a Waters Q-ToF Micro MS/MS System ESI spectrometer. Melting points were measured on a WC-1 instrument and are uncorrected. Catalytic reactions were carried out in 35 mL pressure tubes with Teflon screw caps under air. Solvents were dried with standard methods and freshly distilled prior to use if needed. Substrates **1a-1k** were synthesized according to relevant literatures. Unless otherwise mentioned, all materials were commercially obtained and used without further purification.

## 2. Experimental Section

### 2.1 Optimization of Reaction Conditions

Table S1 Effect of Solvents<sup>a</sup>

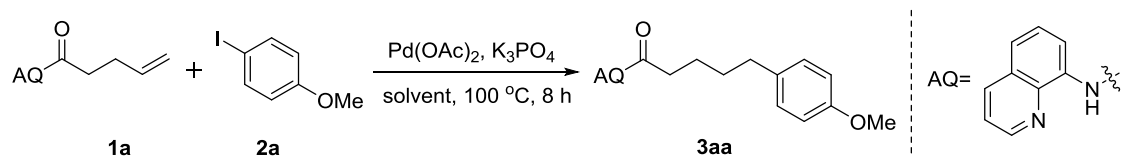

| Entry           | Solvent            | Yield (%) |
|-----------------|--------------------|-----------|
| 1               | MeOH               | 34        |
| <b>2</b>        | <b>EtOH</b>        | <b>73</b> |
| 3               | <i>i</i> -PrOH     | 31        |
| 4               | <i>t</i> -BuOH     | trace     |
| 5               | <i>n</i> -BuOH     | 31        |
| 6               | <i>n</i> -PrOH     | 36        |
| 7               | HOAc               | trace     |
| 8               | DMSO               | trace     |
| 9               | CH <sub>3</sub> CN | trace     |
| 10              | DMF                | trace     |
| 11              | Toluene            | trace     |
| 12              | THF                | trace     |
| 13              | EtOAc              | trace     |
| 14              | 1,4-Dioxane        | trace     |
| 15              | DCE                | trace     |
| 16 <sup>b</sup> | EtOH               | 71        |
| 17 <sup>c</sup> | EtOH               | 67        |
| 18 <sup>d</sup> | EtOH               | 73        |
| 19              | EG                 | 32        |

<sup>a</sup>Reaction conditions: **1a** (0.2 mmol), **2a** (0.3 mmol), Pd(OAc)<sub>2</sub> (5 mol%), K<sub>3</sub>PO<sub>4</sub> (0.3 mmol), solvent (1.0 mL), 100 °C, 8 h, under air. Isolated yields. <sup>b</sup>Under Ar. <sup>c</sup>Dry EtOH. <sup>d</sup>H<sub>2</sub>O (5 equiv) was added.

**Table S2 Effect of Additives<sup>a</sup>**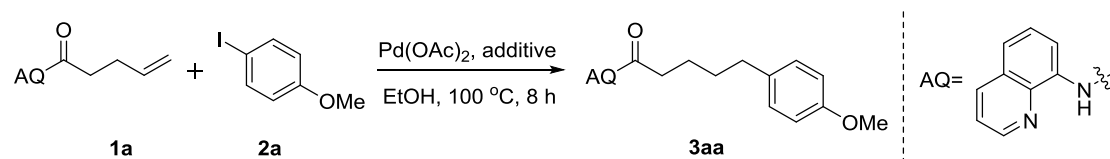

| Entry | Additive                                           | Yield (%) |
|-------|----------------------------------------------------|-----------|
| 1     | /                                                  | trace     |
| 2     | <b>K<sub>3</sub>PO<sub>4</sub></b>                 | <b>73</b> |
| 3     | K <sub>2</sub> CO <sub>3</sub>                     | 30        |
| 4     | <i>t</i> -BuOK                                     | 60        |
| 5     | KTFA                                               | ND        |
| 6     | KHCO <sub>3</sub>                                  | ND        |
| 7     | K <sub>2</sub> HPO <sub>4</sub> ·3H <sub>2</sub> O | ND        |
| 8     | KOAc                                               | trace     |
| 9     | KOH                                                | 65        |
| 10    | KBr                                                | ND        |
| 11    | NaF                                                | ND        |
| 12    | Na <sub>2</sub> CO <sub>3</sub>                    | ND        |
| 13    | PivOK                                              | ND        |
| 14    | NaOH                                               | 67        |
| 15    | EtONa                                              | 29        |
| 16    | NaNO <sub>2</sub>                                  | trace     |
| 17    | PhCOONa                                            | trace     |
| 18    | Na <sub>2</sub> C <sub>2</sub> O <sub>4</sub>      | trace     |
| 19    | HOAc                                               | ND        |
| 20    | PhCOOH                                             | ND        |
| 21    | LiOH                                               | 37        |

<sup>a</sup>Reaction conditions: **1a** (0.2 mmol), **2a** (0.3 mmol), Pd(OAc)<sub>2</sub> (5 mol%), additive (0.3 mmol), EtOH (1.0 mL), 100 °C, 8 h, under air. Isolated yields. ND: not detected.

**Table S3 Effect of Catalyst Loading<sup>a</sup>**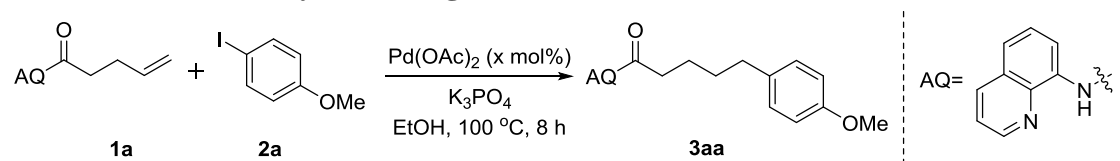

| Entry | Catalyst loading (mol%) | Yield (%) |
|-------|-------------------------|-----------|
| 1     | 10.0                    | 72        |
| 2     | <b>5.0</b>              | <b>73</b> |
| 3     | 2.5                     | 65        |
| 4     | 1.0                     | 43        |

<sup>a</sup>Reaction conditions: **1a** (0.2 mmol), **2a** (0.3 mmol), Pd(OAc)<sub>2</sub> (x mol%), K<sub>3</sub>PO<sub>4</sub> (0.3 mmol), EtOH (1.0 mL), 100 °C, 8 h, under air. Isolated yields.

**Table S4 Effect of Pd Sources<sup>a</sup>**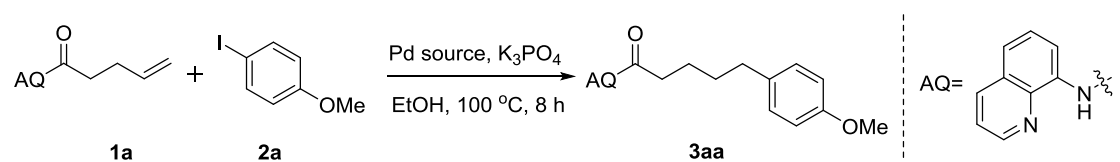

| Entry | Pd source                                             | Yield (%) |
|-------|-------------------------------------------------------|-----------|
| 1     | <b>Pd(OAc)<sub>2</sub></b>                            | <b>73</b> |
| 2     | PdCl <sub>2</sub>                                     | 63        |
| 3     | <b>Pd(CH<sub>3</sub>CN)<sub>2</sub>Cl<sub>2</sub></b> | <b>73</b> |
| 4     | Pd(PPh <sub>3</sub> ) <sub>2</sub> Cl <sub>2</sub>    | ND        |
| 5     | Pd <sub>2</sub> (dba) <sub>3</sub>                    | 48        |
| 6     | Pd(dba) <sub>2</sub>                                  | 46        |
| 7     | Pd(PPh <sub>3</sub> ) <sub>4</sub>                    | ND        |

<sup>a</sup>Reaction conditions: **1a** (0.2 mmol), **2a** (0.3 mmol), Pd source (5 mol%), K<sub>3</sub>PO<sub>4</sub> (0.3 mmol), EtOH (1.0 mL), 100 °C, 8 h, under air. Isolated yields. ND: not detected.

**Table S5 Effect of Ligands<sup>a</sup>**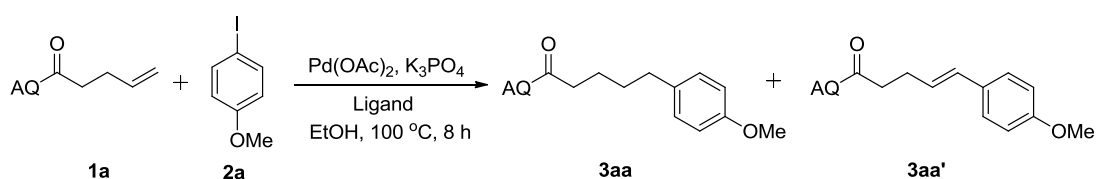

| Entry | Ligand (10 mol%)                  | 3aa (%) | 3aa' (%) |
|-------|-----------------------------------|---------|----------|
| 1     | /                                 | 73      | ND       |
| 2     | Cy-Johnphos                       | 26      | 18       |
| 3     | PCy <sub>3</sub> HBF <sub>4</sub> | ND      | 34       |
| 4     | X-phos                            | 74      | ND       |
| 5     | PCy <sub>3</sub>                  | ND      | 40       |
| 6     | Ph <sub>2</sub> PCy               | ND      | 26       |
| 7     | Ph <sub>2</sub> PEt               | ND      | 17       |
| 8     | Cy <sub>2</sub> NH                | 71      | ND       |

<sup>a</sup>Reaction conditions: **1a** (0.2 mmol), **2a** (0.3 mmol), Pd(OAc)<sub>2</sub> (5 mol%), K<sub>3</sub>PO<sub>4</sub> (0.3 mmol), Ligand (10 mol%), EtOH (1.0 mL), 100 °C, 8 h, under Ar. Isolated yields.

**Table S6 Reaction of 1a with phenyl bromide and chloride<sup>a</sup>**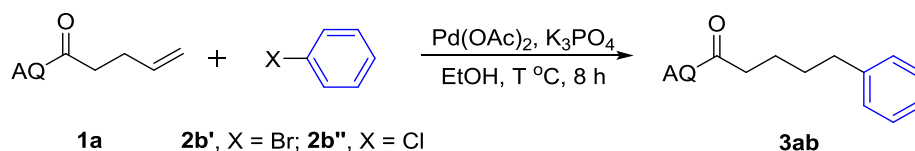

| Entry            | Catalyst loading (mol%) | X  | T (°C) | Ligand (mol%)         | Yield (%) |
|------------------|-------------------------|----|--------|-----------------------|-----------|
| 1                | 5                       | Br | 100    | /                     | 38        |
| 2                | 5                       | Cl | 100    | /                     | ND        |
| 3                | 5                       | Br | 120    | /                     | ND        |
| 4 <sup>b,c</sup> | 5                       | Br | 100    | X-phos (10 mol%)      | 36        |
| 5 <sup>b,c</sup> | 5                       | Br | 100    | Cy-Johnphos (10 mol%) | 23        |
| 6                | 10                      | Br | 100    | /                     | 44        |
| 7 <sup>d</sup>   | 10                      | Br | 100    | /                     | 66        |

<sup>a</sup>Reaction conditions: **1a** (0.2 mmol), **2b'** or **2b''** (0.3 mmol), Pd(OAc)<sub>2</sub>, K<sub>3</sub>PO<sub>4</sub> (0.3 mmol), EtOH (1.0 mL), 8 h, under air. Isolated yields. ND: not detected. <sup>b</sup>Under Ar.

<sup>c</sup>Occurrence of the Heck reaction was observed. <sup>d</sup>**2b'** (0.6 mmol).

### Reaction of 3-butenic acid derivative bearing AQ group (**6**) with 4-iodoanisole:

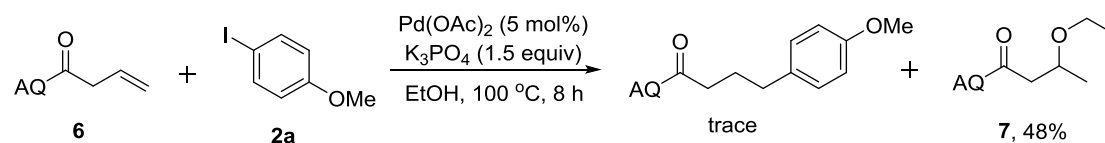

To a 35 mL pressure tube, **6** (0.2 mmol), **2a** (0.3 mmol), Pd(OAc)<sub>2</sub> (5 mol%), K<sub>3</sub>PO<sub>4</sub> (0.3 mmol) and EtOH (1.0 mL) were added sequentially. The reaction was stirred in a *pre-warmed* 100 °C oil bath for 8 hours under air. Then the reaction was quenched with ethyl acetate, filtered through a pad of celite, concentrated and purified by preparative TLC on silica gel plates (petroleum ether/ethyl acetate = 7/1) to give **7** in 48% yield. <sup>1</sup>H NMR (400 MHz, CDCl<sub>3</sub>) δ 10.53 (s, 1H), 8.84 – 8.76 (m, 2H), 8.14 (dd, *J* = 1.6, 8.3 Hz, 1H), 7.56 – 7.46 (m, 2H), 7.43 (dd, *J* = 4.2, 8.2 Hz, 1H), 4.04 – 3.93 (m, 1H), 3.76 – 3.66 (m, 1H), 3.65 – 3.54 (m, 1H), 2.77 (dd, *J* = 7.9, 15.0 Hz, 1H), 2.65 (dd, *J* = 3.7, 15.0 Hz, 1H), 1.37 – 1.29 (m, 6H).

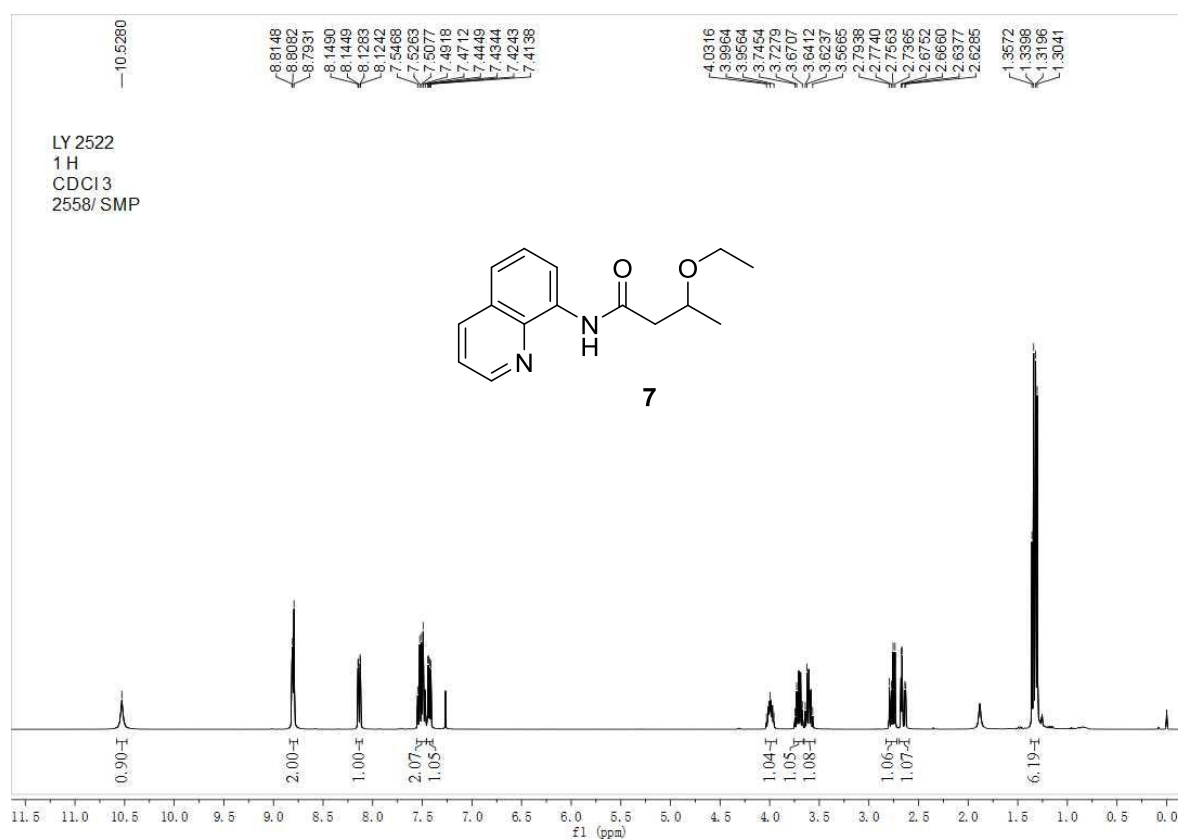

## 2.2 Synthesis of Alkene Substrates

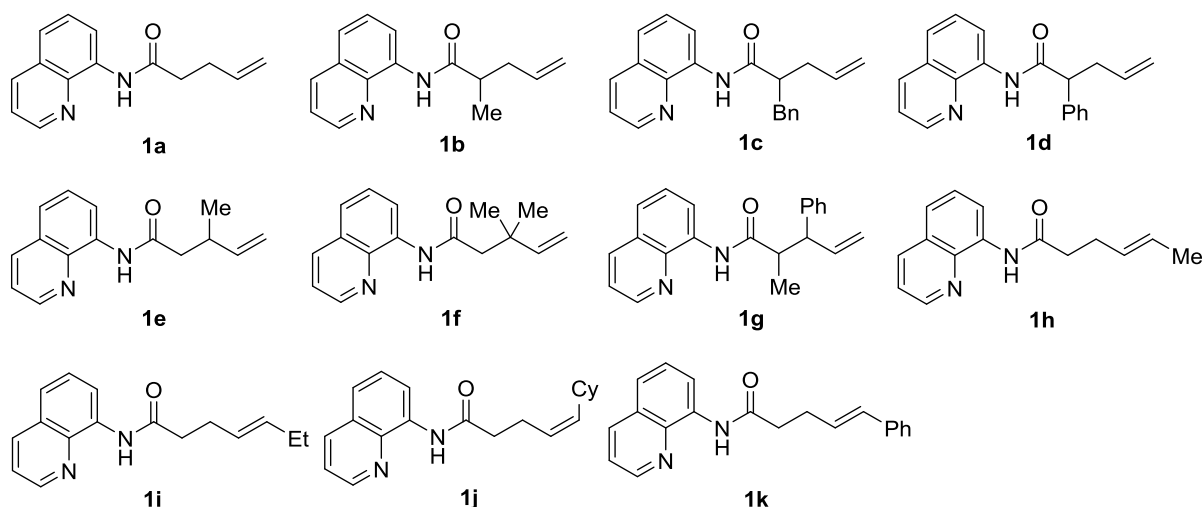

General Procedure A for Installing Directing Group:<sup>1</sup>

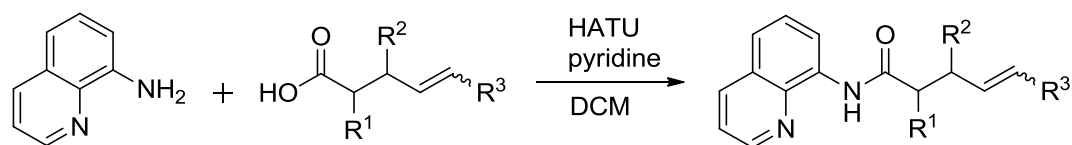

To a 100 mL round bottom flask equipped with a magnetic stir bar were added 8-aminoquinoline (1.0 equiv), pyridine (3.0 equiv), HATU (1.5 equiv), DCM (0.4 M) and corresponding acid (1.0 equiv). The reaction was stirred at 25 °C for 12 h. The solvent was removed under vacuum, and the residue was diluted with ethyl acetate, washed with sat. NaHCO<sub>3</sub> (20 mL, ×2) and brine (20 mL, ×1). The organic layer was then dried, concentrated under vacuum, and purified by column chromatography (petroleum ether/ethyl acetate = 20/1-15/1) to afford corresponding product.

### *N*-(quinolin-8-yl)pent-4-enamide (1a)

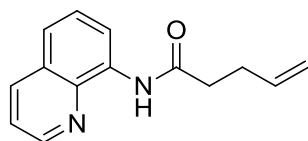

The title compound was prepared from 4-pentenoic acid according to the general procedure A, affording **1a** as a yellow oil in 87% yield. <sup>1</sup>H NMR (400 MHz, CDCl<sub>3</sub>) δ 9.82 (s, 1H), 8.89 – 8.71 (m, 2H), 8.16 (dd, *J* = 1.7, 8.3 Hz, 1H), 7.58 – 7.48 (m, 2H), 7.45 (dd, *J* = 4.2, 8.3 Hz, 1H), 6.01 – 5.87 (m, 1H), 5.16 (qd, *J* = 1.6, 17.1 Hz, 1H), 5.08 – 5.02 (m, 1H), 2.72 – 2.63 (m, 2H), 2.62 – 2.54 (m, 2H).

### 2-methyl-*N*-(quinolin-8-yl)pent-4-enamide (1b)

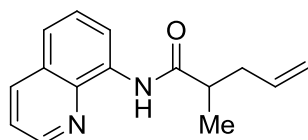



2-methylpent-4-enoic acid was prepared by an adjusted literature procedure.<sup>2</sup> To a 100 mL flask was added diisopropylamine (22 mmol) in THF (0.5 M) and then *n*-BuLi (22 mmol, 2.5 M in THF) was added dropwise at -78 °C. The mixture was warmed to 0 °C and stirred for 0.5 h to afford LDA. Allylacetic acid (10 mmol) in THF (1 M) was added at -78 °C and the mixture was stirred for 0.5 h. Then iodomethane (11 mmol) was added into the mixture. The mixture was heated to room temperature and stirred overnight. After the reaction, the mixture was poured into 20 mL ice water. The organic phase was separated. The aqueous layer was acidified with HCl (2 M) and extracted with ethyl acetate (15 mL,  $\times 9$ ). The combined organic layer was washed with brine and dried over Na<sub>2</sub>SO<sub>4</sub>. After removal of the solvent under reduced pressure, crude 2-methylpent-4-enoic acid was obtained. The crude acid was taken forward to the next step without further purification according to general procedure A to afford **1b** as a yellow oil. <sup>1</sup>H NMR (400 MHz, CDCl<sub>3</sub>)  $\delta$  9.87 (s, 1H), 8.84 – 8.75 (m, 2H), 8.13 (dd, *J* = 1.6, 8.3 Hz, 1H), 7.55 – 7.45 (m, 2H), 7.42 (dd, *J* = 4.2, 8.3 Hz, 1H), 5.93 – 5.80 (m, 1H), 5.19 – 5.09 (m, 1H), 5.08 – 5.00 (m, 1H), 2.75 – 2.53 (m, 2H), 2.38 – 2.27 (m, 1H), 1.34 (d, *J* = 6.8 Hz, 3H).

#### 2-benzyl-N-(quinolin-8-yl)pent-4-enamide (1c)

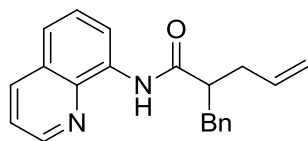

2-benzylpent-4-enoic acid was prepared by literature procedure.<sup>3</sup> Crude 2-benzylpent-4-enoic acid was taken forward to the next step without further purification according to general procedure A to afford **1c** as a yellow oil. <sup>1</sup>H NMR (400 MHz, CDCl<sub>3</sub>)  $\delta$  9.67 (s, 1H), 8.78 (dd, *J* = 1.5, 7.4 Hz, 1H), 8.73 (dd, *J* = 1.6, 4.2 Hz, 1H), 8.11 (dd, *J* = 1.6, 8.3 Hz, 1H), 7.54 – 7.44 (m, 2H), 7.40 (dd, *J* = 4.2, 8.2 Hz, 1H), 7.30 – 7.18 (m, 4H), 7.15 – 7.08 (m, 1H), 5.95 – 5.81 (m, 1H), 5.20 – 5.10 (m, 1H), 5.07 – 5.00 (m, 1H), 3.20 – 3.10 (m, 1H), 2.96 – 2.80 (m, 2H), 2.65 – 2.54 (m, 1H), 2.45 – 2.35 (m, 1H).

#### 2-phenyl-N-(quinolin-8-yl)pent-4-enamide (1d)

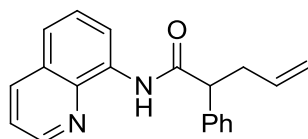

2-phenylpent-4-enoic acid was prepared by literature procedure.<sup>4</sup> Crude 2-phenylpent-4-enoic acid was taken forward to the next step without further purification according to general procedure A to afford **1d** as a yellow solid. <sup>1</sup>H NMR (400 MHz, CDCl<sub>3</sub>)  $\delta$  9.91 (s, 1H), 8.77 (dd, *J* = 1.6, 7.3 Hz, 1H), 8.73 (dd, *J* = 1.7, 4.2 Hz, 1H), 8.11

(dd,  $J = 1.6, 8.3$  Hz, 1H), 7.53 – 7.44 (m, 4H), 7.42 – 7.34 (m, 3H), 7.31 – 7.26 (m, 1H), 5.89 – 5.76 (m, 1H), 5.18 – 5.10 (m, 1H), 5.04 – 4.98 (m, 1H), 3.81 (t,  $J = 7.6$  Hz, 1H), 3.12 – 3.02 (m, 1H), 2.74 – 2.64 (m, 1H).

### 3-methyl-*N*-(quinolin-8-yl)pent-4-enamide (**1e**)

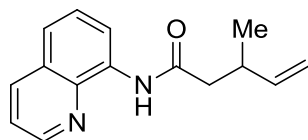

3-methylpent-4-enoic acid was prepared by literature procedure.<sup>5</sup> Crude 3-methylpent-4-enoic acid was taken forward to the next step without further purification according to general procedure A to afford **1e** as a brown oil. <sup>1</sup>H NMR (400 MHz, CDCl<sub>3</sub>)  $\delta$  9.80 (s, 1H), 8.84 – 8.75 (m, 2H), 8.19 – 8.11 (m, 1H), 7.56 – 7.47 (m, 2H), 7.45 (dd,  $J = 4.2, 8.2$  Hz, 1H), 5.96 – 5.84 (m, 1H), 5.17 – 5.08 (m, 1H), 5.04 – 4.97 (m, 1H), 2.96 – 2.84 (m, 1H), 2.66 – 2.57 (m, 1H), 2.55 – 2.46 (m, 1H), 1.17 (d,  $J = 6.8$  Hz, 3H).

### 3,3-dimethyl-*N*-(quinolin-8-yl)pent-4-enamide (**1f**)

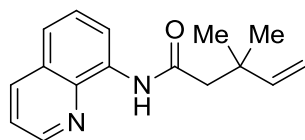

3,3-dimethylpent-4-enoic acid was prepared by literature procedure.<sup>1</sup> Crude 3,3-dimethylpent-4-enoic acid was taken forward to the next step without further purification according to general procedure A to afford **1f** as a yellow oil. <sup>1</sup>H NMR (400 MHz, CDCl<sub>3</sub>)  $\delta$  9.77 (s, 1H), 8.83 – 8.74 (m, 2H), 8.13 (dd,  $J = 1.4, 8.3$  Hz, 1H), 7.55 – 7.45 (m, 2H), 7.43 (dd,  $J = 4.2, 8.3$  Hz, 1H), 6.06 (dd,  $J = 10.7, 17.4$  Hz, 1H), 5.12 – 5.01 (m, 2H), 2.54 (s, 2H), 1.26 (s, 6H).

### 2-methyl-3-phenyl-*N*-(quinolin-8-yl)pent-4-enamide (**1g**)

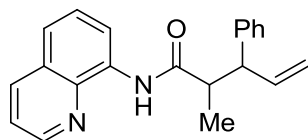

2-methyl-3-phenylpent-4-enoic acid was prepared by literature procedure.<sup>5</sup> Crude 2-methyl-3-phenylpent-4-enoic acid was taken forward to the next step without further purification according to general procedure A to afford **1g** as a yellow solid. <sup>1</sup>H NMR (400 MHz, CDCl<sub>3</sub>)  $\delta$  9.59 (s, 1H), 8.67 (dd,  $J = 1.6, 4.2$  Hz, 1H), 8.62 (dd,  $J = 1.2, 7.5$  Hz, 1H), 7.92 (dd,  $J = 1.3, 8.2$  Hz, 1H), 7.37 – 7.22 (m, 5H), 7.19 – 7.11 (m, 2H), 7.02 – 6.94 (m, 1H), 6.06 – 5.94 (m, 1H), 5.22 – 5.14 (m, 1H), 5.12 (dd,  $J = 1.5, 10.1$  Hz, 1H), 3.69 (t,  $J =$

9.6 Hz, 1H), 2.97 – 2.88 (m, 1H), 1.39 (d,  $J = 6.8$  Hz, 3H).

**(E)-N-(quinolin-8-yl)hex-4-enamide (1h)**

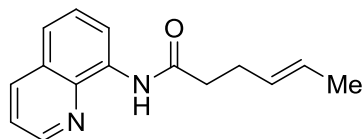

(E)-hex-4-enoic acid was prepared by literature procedure.<sup>6</sup> Crude (E)-hex-4-enoic acid was taken forward to the next step without further purification according to general procedure A to afford **1h** as a brown oil. <sup>1</sup>H NMR (600 MHz, CDCl<sub>3</sub>)  $\delta$  9.82 (s, 1H), 8.83 – 8.76 (m, 2H), 8.15 (d,  $J = 8.2$  Hz, 1H), 7.56 – 7.47 (m, 2H), 7.46 – 7.42 (m, 1H), 5.64 – 5.50 (m, 2H), 2.62 (t,  $J = 7.4$  Hz, 2H), 2.53 – 2.47 (m, 2H), 1.66 (d,  $J = 5.4$  Hz, 3H).

**(E)-N-(quinolin-8-yl)hept-4-enamide (1i)**

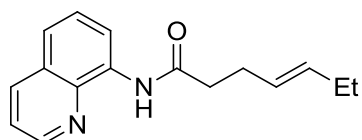

(E)-hept-4-enoic acid was prepared by an adjusted literature procedure.<sup>6</sup> Crude (E)-hept-4-enoic acid was taken forward to the next step without further purification according to general procedure A to afford **1i** as a yellow oil. <sup>1</sup>H NMR (400 MHz, CDCl<sub>3</sub>)  $\delta$  9.81 (s, 1H), 8.82 – 8.75 (m, 2H), 8.15 (dd,  $J = 1.6, 8.3$  Hz, 1H), 7.56 – 7.47 (m, 2H), 7.45 (dd,  $J = 4.2, 8.3$  Hz, 1H), 5.66 – 5.57 (m, 1H), 5.56 – 5.47 (m, 1H), 2.67 – 2.60 (m, 2H), 2.55 – 2.47 (m, 2H), 2.06 – 1.95 (m, 2H), 0.95 (t,  $J = 7.5$  Hz, 3H).

**(Z)-5-cyclohexyl-N-(quinolin-8-yl)pent-4-enamide (1j)**

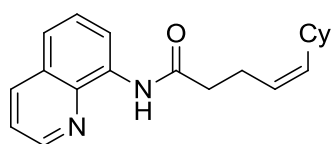

(Z)-5-cyclohexylpent-4-enoic acid was prepared by literature procedure.<sup>7</sup> Crude (Z)-5-cyclohexylpent-4-enoic acid was taken forward to the next step without further purification according to general procedure A to afford **1j** as a yellow oil. <sup>1</sup>H NMR (600 MHz, CDCl<sub>3</sub>)  $\delta$  9.81 (s, 1H), 8.83 – 8.78 (m, 2H), 8.16 (dd,  $J = 1.1, 8.2$  Hz, 1H), 7.56 – 7.48 (m, 2H), 7.45 (dd,  $J = 4.2, 8.2$  Hz, 1H), 5.38 – 5.32 (m, 1H), 5.31 – 5.27 (m, 1H), 2.64 – 2.54 (m, 4H), 2.38 – 2.30 (m, 1H), 1.70 – 1.57 (m, 5H), 1.31 – 1.21 (m, 2H), 1.19 – 1.10 (m, 1H), 1.09 – 1.00 (m, 2H).

### (*E*)-5-phenyl-*N*-(quinolin-8-yl)pent-4-enamide (**1k**)

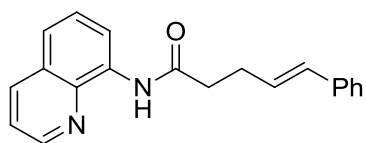

The title compound was prepared by an adjusted literature procedure as a yellow solid.<sup>8</sup> <sup>1</sup>H NMR (400 MHz, CDCl<sub>3</sub>) δ 9.85 (s, 1H), 8.79 (dd, *J* = 1.4, 7.4 Hz, 1H), 8.73 (dd, *J* = 1.6, 4.2 Hz, 1H), 8.13 (dd, *J* = 1.6, 8.3 Hz, 1H), 7.56 – 7.45 (m, 2H), 7.41 (dd, *J* = 4.2, 8.3 Hz, 1H), 7.37 – 7.32 (m, 2H), 7.30 – 7.24 (m, 2H), 7.21 – 7.15 (m, 1H), 6.52 (d, *J* = 15.8 Hz, 1H), 6.38 – 6.26 (m, 1H), 2.77 – 2.69 (m, 4H).

### 2.3 Pd-catalyzed Intermolecular Reductive Heck Reaction

*Typical procedure for reductive Heck reaction of unactivated alkenes with aryl iodides:* To a 35 mL pressure tube, alkene substrate (0.2 mmol), aryl iodide (0.3 mmol), Pd(OAc)<sub>2</sub> (5 mol%), K<sub>3</sub>PO<sub>4</sub> (0.3 mmol) and EtOH (1.0 mL) were added sequentially. The reaction was stirred in a *pre*-warmed 100 °C oil bath for 8 hours under air. Then the reaction was quenched with ethyl acetate, filtered through a pad of celite, concentrated and purified by preparative TLC on silica gel plates (petroleum ether/ethyl acetate = 5/1-25/1 or dichloromethane/ethyl acetate = 120/1) to give the desired product.

*Typical procedure for reductive Heck reaction of unactivated alkenes with aryl bromides:* To a 35 mL pressure tube, alkene substrate (0.2 mmol), aryl bromide (0.6 mmol), Pd(OAc)<sub>2</sub> (10 mol%), K<sub>3</sub>PO<sub>4</sub> (0.3 mmol) and EtOH (1.0 mL) were added sequentially. The reaction was stirred in a *pre*-warmed 100 °C oil bath for 8 hours under air. Then the reaction was quenched with ethyl acetate, filtered through a pad of celite, concentrated and purified by preparative TLC on silica gel plates (petroleum ether/ethyl acetate = 13/1 or dichloromethane/ethyl acetate = 120/1) to give the desired product.

### 5-(4-methoxyphenyl)-*N*-(quinolin-8-yl)pentanamide (**3aa**)

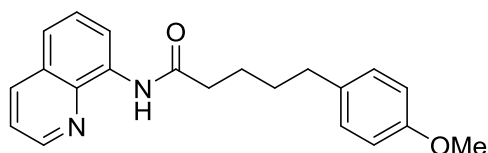

Purified by preparative TLC on silica gel (petroleum ether/ethyl acetate = 15/1) to provide **3aa** as a yellow solid (48.8 mg, 73%), mp = 62-64 °C. <sup>1</sup>H NMR (400 MHz, CDCl<sub>3</sub>) δ 9.80 (s, 1H), 8.83 – 8.75 (m, 2H), 8.14 (d, *J* = 8.2 Hz, 1H), 7.57 – 7.46 (m, 2H), 7.44 (dd, *J* = 4.2, 8.2 Hz, 1H), 7.15 – 7.08 (m, 2H), 6.86 – 6.78 (m, 2H), 3.77 (s, 3H), 2.64 (t, *J* = 7.6 Hz, 2H), 2.58 (t, *J* = 7.4 Hz, 2H), 1.92 – 1.81 (m, 2H), 1.79 – 1.69 (m, 2H). <sup>13</sup>C NMR (100

MHz, CDCl<sub>3</sub>)  $\delta$  171.7, 157.8, 148.1, 138.4, 136.4, 134.6, 134.3, 129.3, 128.0, 127.4, 121.6, 121.4, 116.4, 113.8, 55.3, 38.1, 34.8, 31.3, 25.3. HRMS (positive ESI): [M+H]<sup>+</sup> calcd for C<sub>21</sub>H<sub>23</sub>N<sub>2</sub>O<sub>2</sub> 335.1754, found 335.1764.

### 5-phenyl-*N*-(quinolin-8-yl)pentanamide (3ab)

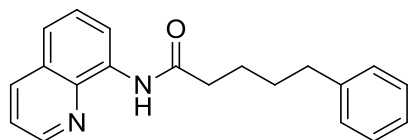

Purified by preparative TLC on silica gel (petroleum ether/ethyl acetate = 15/1) to provide **3ab** as a yellow oil (49.9 mg, 82%). <sup>1</sup>H NMR (400 MHz, CDCl<sub>3</sub>)  $\delta$  9.80 (s, 1H), 8.83 – 8.74 (m, 2H), 8.15 (dd, *J* = 1.6, 8.3 Hz, 1H), 7.57 – 7.47 (m, 2H), 7.44 (dd, *J* = 4.2, 8.3 Hz, 1H), 7.30 – 7.24 (m, 2H), 7.22 – 7.13 (m, 3H), 2.69 (t, *J* = 7.6 Hz, 2H), 2.58 (t, *J* = 7.4 Hz, 2H), 1.94 – 1.83 (m, 2H), 1.82 – 1.72 (m, 2H).

### 5-(4-fluorophenyl)-*N*-(quinolin-8-yl)pentanamide (3ac)

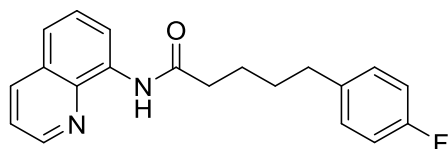

Purified by preparative TLC on silica gel (petroleum ether/ethyl acetate = 12/1) to provide **3ac** as a brown oil (43.2 mg, 67%). <sup>1</sup>H NMR (400 MHz, CDCl<sub>3</sub>)  $\delta$  9.80 (s, 1H), 8.82 – 8.74 (m, 2H), 8.15 (dd, *J* = 1.5, 8.2 Hz, 1H), 7.57 – 7.47 (m, 2H), 7.44 (dd, *J* = 4.2, 8.3 Hz, 1H), 7.17 – 7.10 (m, 2H), 6.98 – 6.91 (m, 2H), 2.66 (t, *J* = 7.6 Hz, 2H), 2.58 (t, *J* = 7.4 Hz, 2H), 1.92 – 1.81 (m, 2H), 1.80 – 1.69 (m, 2H). <sup>13</sup>C NMR (100 MHz, CDCl<sub>3</sub>)  $\delta$  171.5, 161.2 (d, <sup>1</sup>*J*<sub>CF</sub> = 241.6 Hz), 148.1, 138.3, 137.8 (d, <sup>4</sup>*J*<sub>CF</sub> = 3.2 Hz), 136.4, 134.5, 129.7 (d, <sup>3</sup>*J*<sub>CF</sub> = 7.7 Hz), 128.0, 127.4, 121.6, 121.4, 116.5, 115.0 (d, <sup>2</sup>*J*<sub>CF</sub> = 21.0 Hz), 38.0, 34.9, 31.2, 25.2. <sup>19</sup>F NMR (376 MHz, CDCl<sub>3</sub>)  $\delta$  -117.89. HRMS (positive ESI): [M+H]<sup>+</sup> calcd for C<sub>20</sub>H<sub>20</sub>FN<sub>2</sub>O 323.1554, found 323.1560.

### 5-(4-chlorophenyl)-*N*-(quinolin-8-yl)pentanamide (3ad)

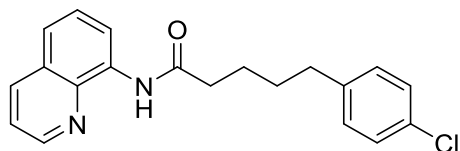

Purified by preparative TLC on silica gel (petroleum ether/ethyl acetate = 15/1) to provide **3ad** as a pale brown solid (46.7 mg, 69%), mp = 67-69 °C. <sup>1</sup>H NMR (400 MHz, CDCl<sub>3</sub>)  $\delta$  9.79 (s, 1H), 8.83 – 8.74 (m, 2H), 8.16 (dd, *J* = 1.6, 8.3 Hz, 1H), 7.57 – 7.47 (m, 2H), 7.45 (dd, *J* = 4.2, 8.3 Hz, 1H), 7.25 – 7.19 (m, 2H), 7.15 – 7.08 (m, 2H), 2.66 (t, *J* = 7.5 Hz, 2H),

2.58 (t,  $J = 7.3$  Hz, 2H), 1.92 – 1.81 (m, 2H), 1.79 – 1.70 (m, 2H).  $^{13}\text{C}$  NMR (100 MHz,  $\text{CDCl}_3$ )  $\delta$  171.5, 148.1, 140.6, 138.3, 136.4, 134.5, 131.5, 129.8, 128.4, 128.0, 127.5, 121.6, 121.5, 116.4, 38.0, 35.1, 30.9, 25.2. HRMS (positive ESI):  $[\text{M}+\text{H}]^+$  calcd for  $\text{C}_{20}\text{H}_{20}\text{ClN}_2\text{O}$  339.1259, found 339.1264.

### 5-(4-bromophenyl)-*N*-(quinolin-8-yl)pentanamide (3ae)

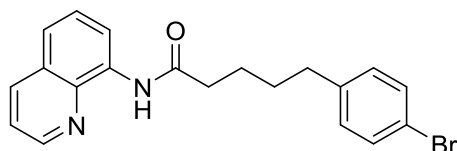

Purified by preparative TLC on silica gel (petroleum ether/ethyl acetate = 15/1) to provide **3ae** as a yellow solid (40.6 mg, 53%), mp = 90-91 °C.  $^1\text{H}$  NMR (400 MHz,  $\text{CDCl}_3$ )  $\delta$  9.79 (s, 1H), 8.83 – 8.72 (m, 2H), 8.14 (dd,  $J = 1.4, 8.2$  Hz, 1H), 7.55 – 7.46 (m, 2H), 7.44 (dd,  $J = 4.2, 8.2$  Hz, 1H), 7.40 – 7.33 (m, 2H), 7.08 – 7.02 (m, 2H), 2.63 (t,  $J = 7.6$  Hz, 2H), 2.57 (t,  $J = 7.3$  Hz, 2H), 1.91 – 1.79 (m, 2H), 1.78 – 1.67 (m, 2H).  $^{13}\text{C}$  NMR (150 MHz,  $\text{CDCl}_3$ )  $\delta$  171.5, 148.1, 141.3, 138.3, 136.4, 134.5, 131.4, 130.2, 128.0, 127.4, 121.6, 121.4, 119.5, 116.4, 37.9, 35.1, 30.9, 25.2. HRMS (positive ESI):  $[\text{M}+\text{H}]^+$  calcd for  $\text{C}_{20}\text{H}_{20}\text{BrN}_2\text{O}$  383.0754, found 383.0759.

### 5-(*p*-tolyl)-*N*-(quinolin-8-yl)pentanamide (3af)

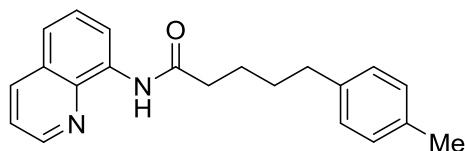

Purified by preparative TLC on silica gel (petroleum ether/ethyl acetate = 15/1) to provide **3af** as a pale yellow solid (43.3 mg, 68%), mp = 42-43 °C.  $^1\text{H}$  NMR (400 MHz,  $\text{CDCl}_3$ )  $\delta$  9.81 (s, 1H), 8.83 – 8.76 (m, 2H), 8.15 (dd,  $J = 1.6, 8.3$  Hz, 1H), 7.57 – 7.48 (m, 2H), 7.45 (dd,  $J = 4.2, 8.3$  Hz, 1H), 7.13 – 7.06 (m, 4H), 2.67 (t,  $J = 7.6$  Hz, 2H), 2.59 (t,  $J = 7.5$  Hz, 2H), 2.32 (s, 3H), 1.94 – 1.83 (m, 2H), 1.80 – 1.71 (m, 2H).  $^{13}\text{C}$  NMR (100 MHz,  $\text{CDCl}_3$ )  $\delta$  171.7, 148.1, 139.1, 138.3, 136.4, 135.2, 134.5, 129.0, 128.3, 128.0, 127.5, 121.6, 121.4, 116.4, 38.1, 35.3, 31.3, 25.4, 21.0. HRMS (positive ESI):  $[\text{M}+\text{H}]^+$  calcd for  $\text{C}_{21}\text{H}_{23}\text{N}_2\text{O}$  319.1805, found 319.1812.

### 5-(4-(trifluoromethyl)phenyl)-*N*-(quinolin-8-yl)pentanamide (3ag)

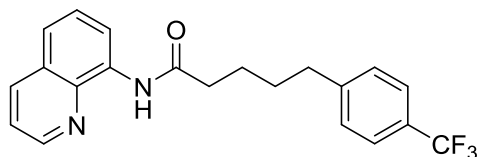

Purified by preparative TLC on silica gel (petroleum ether/ethyl acetate = 15/1) to provide

**3ag** as a brown oil (49.9 mg, 67%). <sup>1</sup>H NMR (400 MHz, CDCl<sub>3</sub>) δ 9.80 (s, 1H), 8.82 – 8.72 (m, 2H), 8.14 (dd, *J* = 1.6, 8.3 Hz, 1H), 7.56 – 7.46 (m, 4H), 7.44 (dd, *J* = 4.2, 8.3 Hz, 1H), 7.29 (d, *J* = 8.0 Hz, 2H), 2.74 (t, *J* = 7.5 Hz, 2H), 2.59 (t, *J* = 7.3 Hz, 2H), 1.93 – 1.82 (m, 2H), 1.82 – 1.73 (m, 2H). <sup>13</sup>C NMR (100 MHz, CDCl<sub>3</sub>) δ 171.4, 148.1, 146.3, 138.3, 136.4, 134.5, 128.7, 128.2 (q, <sup>2</sup>*J*<sub>CF</sub> = 32.1 Hz), 128.0, 127.4, 125.3 (q, <sup>3</sup>*J*<sub>CF</sub> = 3.8 Hz), 124.4 (q, <sup>1</sup>*J*<sub>CF</sub> = 270.1 Hz), 121.6, 121.5, 116.4, 37.9, 35.6, 30.7, 25.2. <sup>19</sup>F NMR (565 MHz, CDCl<sub>3</sub>) δ -62.27. HRMS (positive ESI): [M+H]<sup>+</sup> calcd for C<sub>21</sub>H<sub>20</sub>F<sub>3</sub>N<sub>2</sub>O 373.1522, found 373.1531.

### 5-(4-acetylphenyl)-*N*-(quinolin-8-yl)pentanamide (**3ah**)

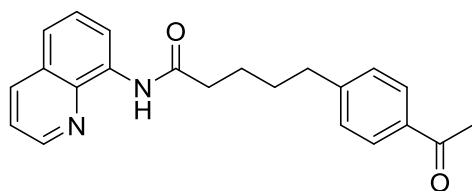

Purified by preparative TLC on silica gel (petroleum ether/ethyl acetate = 6/1) to provide **3ah** as a brown oil (31.9 mg, 46%). <sup>1</sup>H NMR (400 MHz, CDCl<sub>3</sub>) δ 9.79 (s, 1H), 8.82 – 8.74 (m, 2H), 8.18 – 8.12 (m, 1H), 7.86 (d, *J* = 8.2 Hz, 2H), 7.56 – 7.47 (m, 2H), 7.44 (dd, *J* = 4.2, 8.3 Hz, 1H), 7.28 (d, *J* = 8.1 Hz, 2H), 2.75 (t, *J* = 7.4 Hz, 2H), 2.59 (t, *J* = 7.2 Hz, 2H), 2.56 (s, 3H), 1.92 – 1.74 (m, 4H). <sup>13</sup>C NMR (100 MHz, CDCl<sub>3</sub>) δ 197.8, 171.4, 148.1, 148.0, 138.3, 136.4, 135.1, 134.5, 128.6, 128.5, 128.0, 127.4, 121.6, 121.5, 116.4, 37.9, 35.7, 30.6, 26.5, 25.2. HRMS (positive ESI): [M+H]<sup>+</sup> calcd for C<sub>22</sub>H<sub>23</sub>N<sub>2</sub>O<sub>2</sub> 347.1754, found 347.1770.

### 5-([1,1'-biphenyl]-4-yl)-*N*-(quinolin-8-yl)pentanamide (**3ai**)

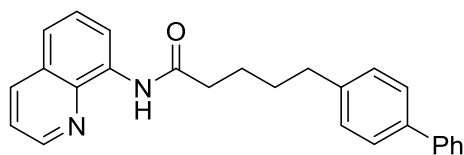

Purified by preparative TLC on silica gel (petroleum ether/ethyl acetate = 15/1) to provide **3ai** as a pale yellow solid (54.8 mg, 72%), mp = 83-85 °C. <sup>1</sup>H NMR (400 MHz, CDCl<sub>3</sub>) δ 9.80 (s, 1H), 8.83 – 8.73 (m, 2H), 8.11 (dd, *J* = 1.5, 8.3 Hz, 1H), 7.59 – 7.44 (m, 6H), 7.43 – 7.37 (m, 3H), 7.33 – 7.21 (m, 3H), 2.72 (t, *J* = 7.5 Hz, 2H), 2.59 (t, *J* = 7.4 Hz, 2H), 1.95 – 1.85 (m, 2H), 1.84 – 1.74 (m, 2H). <sup>13</sup>C NMR (100 MHz, CDCl<sub>3</sub>) δ 171.6, 148.1, 141.4, 141.2, 138.8, 138.4, 136.4, 134.6, 128.9, 128.7, 128.0, 127.5, 127.1, 127.0, 121.6, 121.4, 116.5, 38.1, 35.4, 31.1, 25.4. HRMS (positive ESI): [M+H]<sup>+</sup> calcd for C<sub>26</sub>H<sub>25</sub>N<sub>2</sub>O 381.1961, found 381.1967.

### 5-(4-(*tert*-butyl)phenyl)-*N*-(quinolin-8-yl)pentanamide (**3aj**)

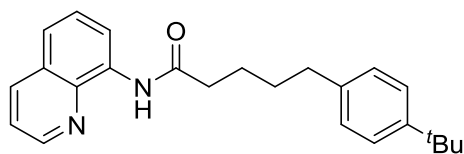

Purified by preparative TLC on silica gel (dichloromethane/ethyl acetate = 120/1) to provide **3aj** as a yellow oil (39.6 mg, 55%).  $^1\text{H}$  NMR (400 MHz,  $\text{CDCl}_3$ )  $\delta$  9.82 (s, 1H), 8.85 – 8.76 (m, 2H), 8.16 (dd,  $J$  = 1.6, 8.3 Hz, 1H), 7.58 – 7.48 (m, 2H), 7.45 (dd,  $J$  = 4.2, 8.3 Hz, 1H), 7.34 – 7.28 (m, 2H), 7.18 – 7.12 (m, 2H), 2.68 (t,  $J$  = 7.6 Hz, 2H), 2.60 (t,  $J$  = 7.4 Hz, 2H), 1.95 – 1.85 (m, 2H), 1.83 – 1.73 (m, 2H), 1.31 (s, 9H).  $^{13}\text{C}$  NMR (100 MHz,  $\text{CDCl}_3$ )  $\delta$  171.7, 148.5, 148.1, 139.1, 138.4, 136.4, 134.6, 128.1, 128.0, 127.5, 125.2, 121.6, 121.4, 116.5, 38.2, 35.2, 34.4, 31.5, 31.1, 25.5. HRMS (positive ESI):  $[\text{M}+\text{H}]^+$  calcd for  $\text{C}_{24}\text{H}_{29}\text{N}_2\text{O}$  361.2274, found 361.2281.

### 5-(*m*-tolyl)-*N*-(quinolin-8-yl)pentanamide (**3ak**)

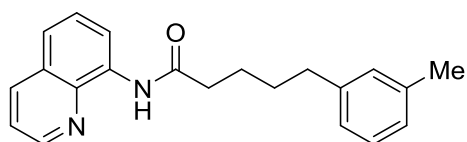

Purified by preparative TLC on silica gel (petroleum ether/ethyl acetate = 15/1) to provide **3ak** as a yellow oil (44.6 mg, 70%).  $^1\text{H}$  NMR (400 MHz,  $\text{CDCl}_3$ )  $\delta$  9.79 (s, 1H), 8.85 – 8.68 (m, 2H), 8.13 (dd,  $J$  = 1.6, 8.3 Hz, 1H), 7.57 – 7.45 (m, 2H), 7.42 (dd,  $J$  = 4.2, 8.3 Hz, 1H), 7.15 (t,  $J$  = 7.4 Hz, 1H), 7.04 – 6.89 (m, 3H), 2.65 (t,  $J$  = 7.6 Hz, 2H), 2.57 (t,  $J$  = 7.4 Hz, 2H), 2.30 (s, 3H), 1.93 – 1.82 (m, 2H), 1.81 – 1.68 (m, 2H).  $^{13}\text{C}$  NMR (100 MHz,  $\text{CDCl}_3$ )  $\delta$  171.7, 148.1, 142.2, 138.3, 137.9, 136.4, 134.6, 129.3, 128.3, 128.0, 127.5, 126.5, 125.5, 121.6, 121.4, 116.4, 38.1, 35.7, 31.2, 25.4, 21.4. HRMS (positive ESI):  $[\text{M}+\text{H}]^+$  calcd for  $\text{C}_{21}\text{H}_{23}\text{N}_2\text{O}$  319.1805, found 319.1810.

### 5-(3-fluorophenyl)-*N*-(quinolin-8-yl)pentanamide (**3al**)

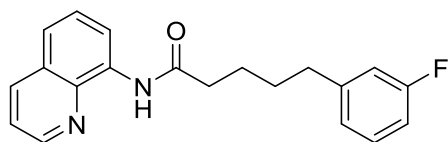

Purified by preparative TLC on silica gel (petroleum ether/ethyl acetate = 15/1) to provide **3al** as a yellow oil (39.3 mg, 61%).  $^1\text{H}$  NMR (400 MHz,  $\text{CDCl}_3$ )  $\delta$  9.80 (s, 1H), 8.81 – 8.74 (m, 2H), 8.14 (dd,  $J$  = 1.6, 8.3 Hz, 1H), 7.56 – 7.46 (m, 2H), 7.43 (dd,  $J$  = 4.2, 8.3 Hz, 1H), 7.27 – 7.17 (m, 1H), 6.96 (d,  $J$  = 7.7 Hz, 1H), 6.92 – 6.82 (m, 2H), 2.68 (t,  $J$  = 7.5 Hz, 2H), 2.58 (t,  $J$  = 7.3 Hz, 2H), 1.91 – 1.80 (m, 2H), 1.80 – 1.70 (m, 2H).  $^{13}\text{C}$  NMR (100 MHz,  $\text{CDCl}_3$ )  $\delta$  171.5, 162.9 (d,  $^1J_{\text{CF}}$  = 244.0 Hz), 148.1, 144.8 (d,  $^3J_{\text{CF}}$  = 7.0 Hz), 138.3, 136.3,



134.5, 129.7 (d,  $^3J_{\text{CF}} = 8.0$  Hz), 128.0, 127.4, 124.1 (d,  $^4J_{\text{CF}} = 2.0$  Hz), 121.6, 121.4, 116.4, 115.2 (d,  $^2J_{\text{CF}} = 20.0$  Hz), 112.6 (d,  $^2J_{\text{CF}} = 21.0$  Hz), 38.0, 35.5 (d,  $^4J_{\text{CF}} = 1.0$  Hz), 30.7, 25.2.  $^{19}\text{F}$  NMR (565 MHz,  $\text{CDCl}_3$ )  $\delta$  -113.89. HRMS (positive ESI):  $[\text{M}+\text{H}]^+$  calcd for  $\text{C}_{20}\text{H}_{20}\text{FN}_2\text{O}$  323.1554, found 323.1560.

### 5-(3-chlorophenyl)-*N*-(quinolin-8-yl)pentanamide (3am)

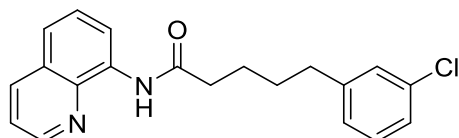

Purified by preparative TLC on silica gel (petroleum ether/ethyl acetate = 15/1) to provide **3am** as a brown solid (37.9 mg, 56%), mp = 42–44 °C.  $^1\text{H}$  NMR (400 MHz,  $\text{CDCl}_3$ )  $\delta$  9.80 (s, 1H), 8.82 – 8.75 (m, 2H), 8.14 (dd,  $J = 1.6, 8.3$  Hz, 1H), 7.57 – 7.47 (m, 2H), 7.44 (dd,  $J = 4.2, 8.3$  Hz, 1H), 7.21 – 7.12 (m, 3H), 7.09 – 7.04 (m, 1H), 2.66 (t,  $J = 7.6$  Hz, 2H), 2.58 (t,  $J = 7.3$  Hz, 2H), 1.93 – 1.80 (m, 2H), 1.79 – 1.69 (m, 2H).  $^{13}\text{C}$  NMR (100 MHz,  $\text{CDCl}_3$ )  $\delta$  171.5, 148.1, 144.2, 138.3, 136.4, 134.5, 134.1, 129.6, 128.5, 128.0, 127.4, 126.7, 126.0, 121.6, 121.4, 116.4, 37.9, 35.4, 30.8, 25.2. HRMS (positive ESI):  $[\text{M}+\text{H}]^+$  calcd for  $\text{C}_{20}\text{H}_{20}\text{ClN}_2\text{O}$  339.1259, found 339.1274.

### 5-(3-methoxyphenyl)-*N*-(quinolin-8-yl)pentanamide (3an)

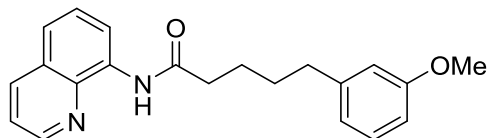

Purified by preparative TLC on silica gel (petroleum ether/ethyl acetate = 15/1) to provide **3an** as a yellow oil (46.1 mg, 69%).  $^1\text{H}$  NMR (400 MHz,  $\text{CDCl}_3$ )  $\delta$  9.81 (s, 1H), 8.83 – 8.76 (m, 2H), 8.14 (dd,  $J = 1.5, 8.3$  Hz, 1H), 7.56 – 7.46 (m, 2H), 7.43 (dd,  $J = 4.2, 8.3$  Hz, 1H), 7.19 (t,  $J = 7.8$  Hz, 1H), 6.80 (d,  $J = 7.6$  Hz, 1H), 6.78 – 6.69 (m, 2H), 3.78 (s, 3H), 2.68 (t,  $J = 7.6$  Hz, 2H), 2.59 (t,  $J = 7.4$  Hz, 2H), 1.94 – 1.84 (m, 2H), 1.82 – 1.72 (m, 2H).  $^{13}\text{C}$  NMR (100 MHz,  $\text{CDCl}_3$ )  $\delta$  171.6, 159.7, 148.1, 143.9, 138.3, 136.4, 134.5, 129.3, 128.0, 127.4, 121.6, 121.4, 120.9, 116.4, 114.2, 111.1, 55.1, 38.1, 35.8, 31.0, 25.4. HRMS (positive ESI):  $[\text{M}+\text{H}]^+$  calcd for  $\text{C}_{21}\text{H}_{23}\text{N}_2\text{O}_2$  335.1754, found 335.1764.

### 5-(*o*-tolyl)-*N*-(quinolin-8-yl)pentanamide (3ao)

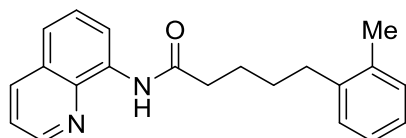

Purified by preparative TLC on silica gel (petroleum ether/ethyl acetate = 15/1) to provide **3ao** as a brown oil (39.5 mg, 62%).  $^1\text{H}$  NMR (400 MHz,  $\text{CDCl}_3$ )  $\delta$  9.82 (s, 1H), 8.84 – 8.77 (m, 2H), 8.15 (dd,  $J = 1.6, 8.3$  Hz, 1H), 7.57 – 7.48 (m, 2H), 7.45 (dd,  $J = 4.2, 8.3$  Hz, 1H), 7.19 – 7.07 (m, 4H), 2.69 (t,  $J = 7.8$  Hz, 2H), 2.61 (t,  $J = 7.5$  Hz, 2H), 2.32 (s, 3H), 1.99 – 1.88 (m, 2H), 1.78 – 1.68 (m, 2H).  $^{13}\text{C}$  NMR (100 MHz,  $\text{CDCl}_3$ )  $\delta$  171.6, 148.1, 140.4, 138.4, 136.4, 135.8, 134.6, 130.2, 128.9, 128.0, 127.5, 125.93, 125.92, 121.6, 121.4, 116.5, 38.1, 33.1, 29.9, 25.7, 19.3. HRMS (positive ESI):  $[\text{M}+\text{H}]^+$  calcd for  $\text{C}_{21}\text{H}_{23}\text{N}_2\text{O}$  319.1805, found 319.1811.

### 5-(2,6-dimethylphenyl)-*N*-(quinolin-8-yl)pentanamide (**3ap**)

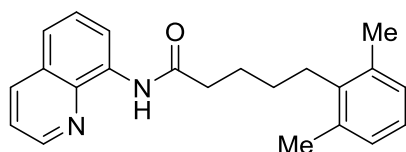

Purified by preparative TLC on silica gel (petroleum ether/ethyl acetate = 15/1) to provide **3ap** as a brown solid (49.2 mg, 74%), mp = 82-84 °C.  $^1\text{H}$  NMR (400 MHz,  $\text{CDCl}_3$ )  $\delta$  9.84 (s, 1H), 8.84 – 8.78 (m, 2H), 8.16 (dd,  $J = 1.7, 8.3$  Hz, 1H), 7.58 – 7.48 (m, 2H), 7.45 (dd,  $J = 4.2, 8.3$  Hz, 1H), 7.02 – 6.97 (m, 3H), 2.75 – 2.68 (m, 2H), 2.64 (t,  $J = 7.6$  Hz, 2H), 2.34 (s, 6H), 2.03 – 1.94 (m, 2H), 1.68 – 1.58 (m, 2H).  $^{13}\text{C}$  NMR (100 MHz,  $\text{CDCl}_3$ )  $\delta$  171.6, 148.1, 139.1, 138.4, 136.4, 136.0, 134.5, 128.1, 128.0, 127.5, 125.6, 121.6, 121.4, 116.5, 38.1, 29.6, 28.8, 26.2, 19.9. HRMS (positive ESI):  $[\text{M}+\text{H}]^+$  calcd for  $\text{C}_{22}\text{H}_{25}\text{N}_2\text{O}$  333.1961, found 333.1971.

### 5-(3,5-dimethylphenyl)-*N*-(quinolin-8-yl)pentanamide (**3aq**)

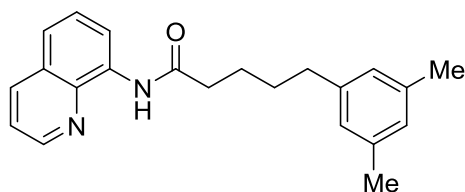

Purified by preparative TLC on silica gel (petroleum ether/ethyl acetate = 15/1) to provide **3aq** as a yellow oil (42.6 mg, 64%).  $^1\text{H}$  NMR (400 MHz,  $\text{CDCl}_3$ )  $\delta$  9.79 (s, 1H), 8.86 – 8.69 (m, 2H), 8.13 (dd,  $J = 1.6, 8.3$  Hz, 1H), 7.55 – 7.45 (m, 2H), 7.42 (dd,  $J = 4.2, 8.3$  Hz, 1H), 6.86 – 6.73 (m, 3H), 2.67 – 2.50 (m, 4H), 2.26 (s, 6H), 1.92 – 1.80 (m, 2H), 1.80 – 1.66 (m, 2H).  $^{13}\text{C}$  NMR (100 MHz,  $\text{CDCl}_3$ )  $\delta$  171.7, 148.1, 142.2, 138.3, 137.8, 136.4, 134.6, 128.0, 127.5, 127.4, 126.3, 121.6, 121.4, 116.4, 38.2, 35.6, 31.2, 25.5, 21.3. HRMS (positive ESI):  $[\text{M}+\text{H}]^+$  calcd for  $\text{C}_{22}\text{H}_{25}\text{N}_2\text{O}$  333.1961, found 333.1973.

### 5-(naphthalen-1-yl)-*N*-(quinolin-8-yl)pentanamide (3ar)

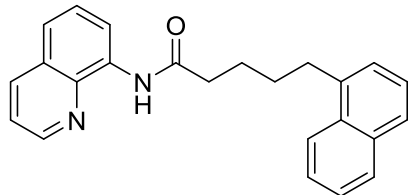

Purified by preparative TLC on silica gel (petroleum ether/ethyl acetate = 20/1) to provide **3ar** as a pale yellow solid (41.1 mg, 58%), mp = 69-72 °C. <sup>1</sup>H NMR (400 MHz, CDCl<sub>3</sub>) δ 9.80 (s, 1H), 8.83 – 8.72 (m, 2H), 8.12 (dd, *J* = 1.6, 8.3 Hz, 1H), 8.06 – 7.99 (m, 1H), 7.85 – 7.78 (m, 1H), 7.69 (d, *J* = 7.9 Hz, 1H), 7.52 (t, *J* = 7.9 Hz, 1H), 7.48 – 7.31 (m, 6H), 3.14 (t, *J* = 7.3 Hz, 2H), 2.60 (t, *J* = 7.3 Hz, 2H), 2.03 – 1.83 (m, 4H). <sup>13</sup>C NMR (100 MHz, CDCl<sub>3</sub>) δ 171.6, 148.1, 138.34, 138.28, 136.4, 134.5, 133.9, 131.8, 128.8, 128.0, 127.5, 126.6, 126.0, 125.8, 125.6, 125.4, 123.8, 121.6, 121.4, 116.5, 38.1, 32.9, 30.4, 25.8. HRMS (positive ESI): [M+H]<sup>+</sup> calcd for C<sub>24</sub>H<sub>23</sub>N<sub>2</sub>O 355.1805, found 355.1810.

### 5-(2-methoxynaphthalen-1-yl)-*N*-(quinolin-8-yl)pentanamide (3as)

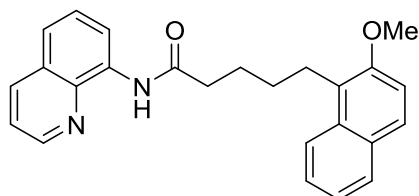

Purified by preparative TLC on silica gel (petroleum ether/ethyl acetate = 20/1) to provide **3as** as a brown solid (48.4 mg, 63%), mp = 85-87 °C. <sup>1</sup>H NMR (400 MHz, CDCl<sub>3</sub>) δ 9.80 (s, 1H), 8.79 (dd, *J* = 1.2, 7.5 Hz, 1H), 8.75 (dd, *J* = 1.6, 4.2 Hz, 1H), 8.09 (dd, *J* = 1.6, 8.3 Hz, 1H), 7.95 (d, *J* = 8.6 Hz, 1H), 7.75 (d, *J* = 8.1 Hz, 1H), 7.69 (d, *J* = 9.0 Hz, 1H), 7.50 (t, *J* = 7.9 Hz, 1H), 7.47 – 7.36 (m, 3H), 7.33 – 7.26 (m, 1H), 7.23 (d, *J* = 9.0 Hz, 1H), 3.91 (s, 3H), 3.16 (t, *J* = 7.7 Hz, 2H), 2.61 (t, *J* = 7.7 Hz, 2H), 2.03 – 1.91 (m, 2H), 1.82 – 1.72 (m, 2H). <sup>13</sup>C NMR (100 MHz, CDCl<sub>3</sub>) δ 171.9, 154.4, 148.1, 138.4, 136.4, 134.6, 133.0, 129.3, 128.6, 128.0, 127.6, 127.5, 126.2, 123.6, 123.3, 123.2, 121.6, 121.4, 116.5, 113.4, 56.5, 38.3, 29.7, 25.9, 24.5. HRMS (positive ESI): [M+H]<sup>+</sup> calcd for C<sub>25</sub>H<sub>25</sub>N<sub>2</sub>O<sub>2</sub> 385.1911, found 385.1900.

### 5-(2-ethoxynaphthalen-1-yl)-*N*-(quinolin-8-yl)pentanamide (3at)

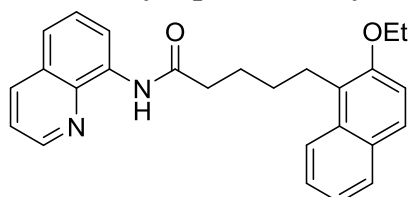

Purified by preparative TLC on silica gel (petroleum ether/ethyl acetate = 20/1) to provide **3at** as a yellow oil (44.6 mg, 56%). <sup>1</sup>H NMR (400 MHz, CDCl<sub>3</sub>) δ 9.81 (s, 1H), 8.79 (dd, *J* = 1.3, 7.5 Hz, 1H), 8.75 (dd, *J* = 1.6, 4.2 Hz, 1H), 8.09 (dd, *J* = 1.6, 8.3 Hz, 1H), 7.96 (d, *J* = 8.5 Hz, 1H), 7.75 (d, *J* = 8.0 Hz, 1H), 7.66 (d, *J* = 9.0 Hz, 1H), 7.50 (t, *J* = 7.9 Hz, 1H), 7.46 – 7.37 (m, 3H), 7.32 – 7.26 (m, 1H), 7.21 (d, *J* = 9.0 Hz, 1H), 4.14 (q, *J* = 7.0 Hz, 2H), 3.17 (t, *J* = 7.7 Hz, 2H), 2.62 (t, *J* = 7.7 Hz, 2H), 2.04 – 1.91 (m, 2H), 1.84 – 1.74 (m, 2H), 1.42 (t, *J* = 7.0 Hz, 3H). <sup>13</sup>C NMR (100 MHz, CDCl<sub>3</sub>) δ 171.9, 153.8, 148.1, 138.4, 136.4, 134.6, 133.1, 129.3, 128.5, 128.0, 127.5, 126.2, 124.0, 123.3, 123.1, 121.6, 121.3, 116.5, 114.6, 64.9, 38.3, 29.7, 25.9, 24.6, 15.3. HRMS (positive ESI): [M+H]<sup>+</sup> calcd for C<sub>26</sub>H<sub>27</sub>N<sub>2</sub>O<sub>2</sub> 399.2067, found 399.2062.

### 2-methyl-5-phenyl-*N*-(quinolin-8-yl)pentanamide (**3bb**)

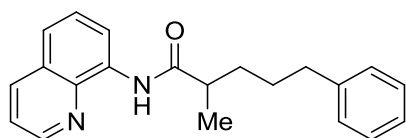

Purified by preparative TLC on silica gel (petroleum ether/ethyl acetate = 15/1) to provide **3bb** as a yellow oil (35.7 mg, 56%). <sup>1</sup>H NMR (400 MHz, CDCl<sub>3</sub>) δ 9.86 (s, 1H), 8.85 – 8.75 (m, 2H), 8.14 (dd, *J* = 1.6, 8.3 Hz, 1H), 7.56 – 7.46 (m, 2H), 7.43 (dd, *J* = 4.2, 8.3 Hz, 1H), 7.27 – 7.20 (m, 2H), 7.19 – 7.10 (m, 3H), 2.72 – 2.55 (m, 3H), 1.97 – 1.84 (m, 1H), 1.80 – 1.69 (m, 2H), 1.66 – 1.55 (m, 1H), 1.32 (d, *J* = 6.9 Hz, 3H).

### 2-benzyl-5-phenyl-*N*-(quinolin-8-yl)pentanamide (**3cb**)

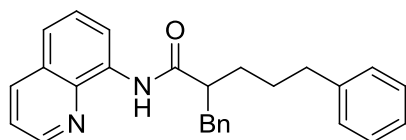

Purified by preparative TLC on silica gel (petroleum ether/ethyl acetate = 15/1) to provide **3cb** as a yellow oil (54.5 mg, 69%). <sup>1</sup>H NMR (400 MHz, CDCl<sub>3</sub>) δ 9.67 (s, 1H), 8.81 – 8.75 (m, 1H), 8.70 (dd, *J* = 1.6, 4.2 Hz, 1H), 8.07 (dd, *J* = 1.6, 8.3 Hz, 1H), 7.52 – 7.42 (m, 2H), 7.37 (dd, *J* = 4.2, 8.3 Hz, 1H), 7.25 – 7.16 (m, 6H), 7.14 – 7.08 (m, 4H), 3.19 – 3.08 (m, 1H), 2.89 – 2.81 (m, 1H), 2.79 – 2.70 (m, 1H), 2.62 (t, *J* = 7.5 Hz, 2H), 1.98 – 1.85 (m, 1H), 1.83 – 1.59 (m, 3H).

### 2-benzyl-5-(4-chlorophenyl)-*N*-(quinolin-8-yl)pentanamide (**3cd**)

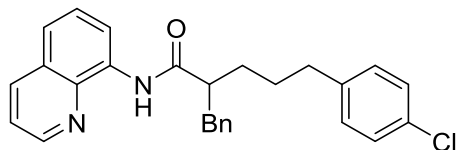

Purified by preparative TLC on silica gel (petroleum ether/ethyl acetate = 15/1) to provide **3cd** as a light yellow oil (34.3 mg, 40%). <sup>1</sup>H NMR (400 MHz, CDCl<sub>3</sub>) δ 9.67 (s, 1H), 8.77 (d, *J* = 7.3 Hz, 1H), 8.72 (dd, *J* = 1.6, 4.2 Hz, 1H), 8.11 (dd, *J* = 1.3, 8.2 Hz, 1H), 7.54 – 7.45 (m, 2H), 7.41 (dd, *J* = 4.2, 8.3 Hz, 1H), 7.24 – 7.18 (m, 4H), 7.17 – 7.08 (m, 3H), 7.06 – 6.99 (m, 2H), 3.13 (dd, *J* = 8.0, 13.5 Hz, 1H), 2.84 (dd, *J* = 6.6, 13.5 Hz, 1H), 2.78 – 2.69 (m, 1H), 2.58 (t, *J* = 7.4 Hz, 2H), 1.95 – 1.82 (m, 1H), 1.79 – 1.58 (m, 3H). <sup>13</sup>C NMR (100 MHz, CDCl<sub>3</sub>) δ 173.6, 148.1, 140.5, 139.5, 138.4, 136.3, 134.3, 131.4, 129.8, 129.0, 128.5, 128.4, 127.9, 127.4, 126.3, 121.6, 121.5, 116.5, 51.1, 39.3, 35.2, 32.1, 29.2. HRMS (positive ESI): [M+H]<sup>+</sup> calcd for C<sub>27</sub>H<sub>26</sub>ClN<sub>2</sub>O 429.1728, found 429.1729.

### 2-benzyl-*N*-(quinolin-8-yl)-5-(4-(trifluoromethyl)phenyl)pentanamide (**3cg**)

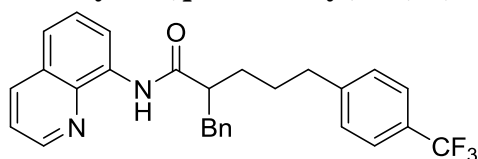

Purified by preparative TLC on silica gel (petroleum ether/ethyl acetate = 15/1) to provide **3cg** as a colorless oil (41.6 mg, 45%). <sup>1</sup>H NMR (400 MHz, CDCl<sub>3</sub>) δ 9.68 (s, 1H), 8.78 (d, *J* = 7.3 Hz, 1H), 8.72 (dd, *J* = 1.6, 4.2 Hz, 1H), 8.11 (dd, *J* = 1.5, 8.2 Hz, 1H), 7.54 – 7.43 (m, 4H), 7.41 (dd, *J* = 4.2, 8.2 Hz, 1H), 7.27 – 7.16 (m, 6H), 7.15 – 7.09 (m, 1H), 3.14 (dd, *J* = 7.9, 13.5 Hz, 1H), 2.85 (dd, *J* = 6.7, 13.5 Hz, 1H), 2.80 – 2.71 (m, 1H), 2.67 (t, *J* = 7.5 Hz, 2H), 1.99 – 1.86 (m, 1H), 1.85 – 1.59 (m, 3H). <sup>13</sup>C NMR (100 MHz, CDCl<sub>3</sub>) δ 173.6, 148.1, 146.2, 139.5, 138.4, 136.3, 134.3, 129.0, 128.7, 128.5, 128.1 (q, <sup>2</sup>*J*<sub>CF</sub> = 32.1 Hz), 127.9, 127.4, 126.3, 125.2 (q, <sup>3</sup>*J*<sub>CF</sub> = 3.8 Hz), 124.4 (q, <sup>1</sup>*J*<sub>CF</sub> = 272.9 Hz), 121.58, 121.56, 116.5, 51.0, 39.3, 35.7, 32.1, 29.0. <sup>19</sup>F NMR (376 MHz, CDCl<sub>3</sub>) δ -62.26. HRMS (positive ESI): [M+H]<sup>+</sup> calcd for C<sub>28</sub>H<sub>26</sub>F<sub>3</sub>N<sub>2</sub>O 463.1992, found 463.1993.

### 5-([1,1'-biphenyl]-4-yl)-2-benzyl-*N*-(quinolin-8-yl)pentanamide (**3ci**)

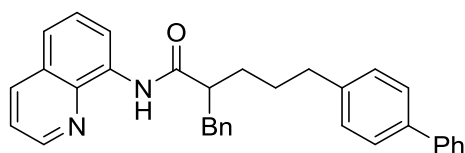

Purified by preparative TLC on silica gel (petroleum ether/ethyl acetate = 15/1) to provide **3ci** as a colorless oil (43.3 mg, 46%). <sup>1</sup>H NMR (400 MHz, CDCl<sub>3</sub>) δ 9.69 (s, 1H), 8.85 – 8.76 (m, 1H), 8.70 (d, *J* = 4.1 Hz, 1H), 8.09 (dd, *J* = 1.4, 8.2 Hz, 1H), 7.57 – 7.35 (m, 9H), 7.32 – 7.27 (m, 1H), 7.26 – 7.16 (m, 6H), 7.15 – 7.08 (m, 1H), 3.21 – 3.09 (m, 1H), 2.92 – 2.83 (m, 1H), 2.82 – 2.72 (m, 1H), 2.67 (t, *J* = 7.3 Hz, 2H), 2.02 – 1.89 (m, 1H), 1.88 – 1.65 (m, 3H). <sup>13</sup>C NMR (100 MHz, CDCl<sub>3</sub>) δ 173.8, 148.1, 141.3, 141.1, 139.7, 138.7, 138.4, 136.3, 134.4, 129.0, 128.9, 128.7, 128.5, 127.9, 127.4, 127.1, 127.0, 126.3, 121.6,

121.5, 116.5, 51.2, 39.3, 35.6, 32.4, 29.3. HRMS (positive ESI):  $[M+H]^+$  calcd for  $C_{33}H_{31}N_2O$  471.2431, found 471.2432.

### 2,5-diphenyl-*N*-(quinolin-8-yl)pentanamide (3db)

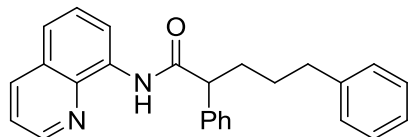

Purified by preparative TLC on silica gel (petroleum ether/ethyl acetate = 15/1) to provide **3db** as a yellow oil (41.1 mg, 54%).  $^1H$  NMR (400 MHz,  $CDCl_3$ )  $\delta$  9.89 (s, 1H), 8.76 (dd,  $J$  = 1.4, 7.5 Hz, 1H), 8.70 (dd,  $J$  = 1.6, 4.2 Hz, 1H), 8.06 (dd,  $J$  = 1.6, 8.3 Hz, 1H), 7.51 – 7.40 (m, 4H), 7.38 – 7.32 (m, 3H), 7.29 – 7.20 (m, 3H), 7.17 – 7.11 (m, 3H), 3.70 (t,  $J$  = 7.6 Hz, 1H), 2.76 – 2.57 (m, 2H), 2.42 – 2.29 (m, 1H), 2.05 – 1.93 (m, 1H), 1.81 – 1.57 (m, 2H).

### 5-(4-chlorophenyl)-2-phenyl-*N*-(quinolin-8-yl)pentanamide (3dd)

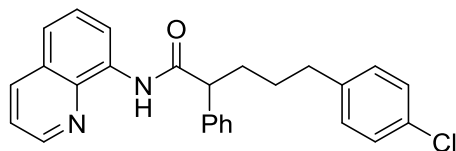

Purified by preparative TLC on silica gel (petroleum ether/ethyl acetate = 15/1) to provide **3dd** as a yellow oil (44.0 mg, 53%).  $^1H$  NMR (400 MHz,  $CDCl_3$ )  $\delta$  9.88 (s, 1H), 8.75 (d,  $J$  = 7.4 Hz, 1H), 8.71 (dd,  $J$  = 1.6, 4.2 Hz, 1H), 8.09 (d,  $J$  = 8.2 Hz, 1H), 7.53 – 7.42 (m, 4H), 7.41 – 7.32 (m, 3H), 7.30 – 7.23 (m, 1H), 7.19 (d,  $J$  = 8.3 Hz, 2H), 7.06 (d,  $J$  = 8.3 Hz, 2H), 3.70 (t,  $J$  = 7.5 Hz, 1H), 2.75 – 2.52 (m, 2H), 2.40 – 2.27 (m, 1H), 2.02 – 1.89 (m, 1H), 1.78 – 1.54 (m, 2H).  $^{13}C$  NMR (100 MHz,  $CDCl_3$ )  $\delta$  171.9, 148.2, 140.5, 139.7, 138.4, 136.3, 134.5, 131.5, 129.8, 128.9, 128.4, 128.0, 127.9, 127.4, 127.3, 121.6, 121.5, 116.3, 54.9, 35.2, 32.9, 29.5. HRMS (positive ESI):  $[M+H]^+$  calcd for  $C_{26}H_{24}ClN_2O$  415.1572, found 415.1574.

### 2-phenyl-*N*-(quinolin-8-yl)-5-(4-(trifluoromethyl)phenyl)pentanamide (3dg)

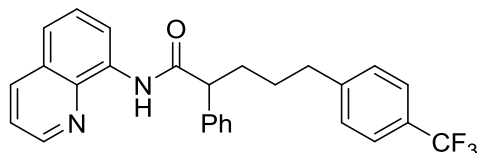

Purified by preparative TLC on silica gel (petroleum ether/ethyl acetate = 15/1) to provide **3dg** as a yellow oil (51.9 mg, 58%).  $^1H$  NMR (400 MHz,  $CDCl_3$ )  $\delta$  9.89 (s, 1H), 8.75 (dd,  $J$  = 1.5, 7.4 Hz, 1H), 8.71 (dd,  $J$  = 1.6, 4.2 Hz, 1H), 8.08 (dd,  $J$  = 1.6, 8.2 Hz, 1H), 7.51 – 7.42 (m, 6H), 7.40 – 7.33 (m, 3H), 7.30 – 7.21 (m, 3H), 3.71 (t,  $J$  = 7.6 Hz, 1H), 2.80 –

2.62 (m, 2H), 2.42 – 2.83 (m, 1H), 2.03 – 1.91 (m, 1H), 1.82 – 1.56 (m, 2H).  $^{13}\text{C}$  NMR (100 MHz,  $\text{CDCl}_3$ )  $\delta$  171.8, 148.2, 146.2, 139.6, 138.4, 136.3, 134.4, 129.0, 128.7, 128.2 (q,  $^2J_{\text{CF}} = 32.4$  Hz), 128.0, 127.9, 127.5, 127.3, 125.2 (q,  $^3J_{\text{CF}} = 3.8$  Hz), 124.4 (q,  $^1J_{\text{CF}} = 272.8$  Hz), 121.6, 116.4, 54.8, 35.7, 32.9, 29.3.  $^{19}\text{F}$  NMR (376 MHz,  $\text{CDCl}_3$ )  $\delta$  -62.24. HRMS (positive ESI):  $[\text{M}+\text{H}]^+$  calcd for  $\text{C}_{27}\text{H}_{24}\text{F}_3\text{N}_2\text{O}$  449.1835, found 449.1837.

### 5-([1,1'-biphenyl]-4-yl)-2-phenyl-*N*-(quinolin-8-yl)pentanamide (3di)

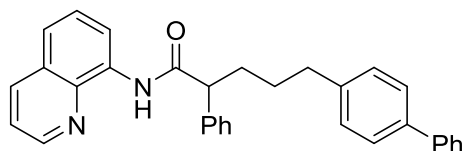

Purified by preparative TLC on silica gel (petroleum ether/ethyl acetate = 15/1) to provide **3di** as a pale yellow oil (42.9 mg, 47%).  $^1\text{H}$  NMR (400 MHz,  $\text{CDCl}_3$ )  $\delta$  9.90 (s, 1H), 8.77 (d,  $J = 7.5$  Hz, 1H), 8.70 (dd,  $J = 1.6, 4.2$  Hz, 1H), 8.07 (dd,  $J = 1.4, 8.3$  Hz, 1H), 7.57 – 7.52 (m, 2H), 7.52 – 7.42 (m, 6H), 7.42 – 7.33 (m, 5H), 7.32 – 7.24 (m, 2H), 7.22 (d,  $J = 8.0$  Hz, 2H), 3.72 (t,  $J = 7.5$  Hz, 1H), 2.80 – 2.62 (m, 2H), 2.46 – 2.32 (m, 1H), 2.09 – 1.95 (m, 1H), 1.85 – 1.60 (m, 2H).  $^{13}\text{C}$  NMR (100 MHz,  $\text{CDCl}_3$ )  $\delta$  172.0, 148.2, 141.3, 141.2, 139.8, 138.8, 138.4, 136.3, 134.5, 128.93, 128.89, 128.7, 128.1, 127.9, 127.38, 127.36, 127.1, 127.03, 127.00, 121.6, 121.5, 116.4, 55.0, 35.5, 33.1, 29.6. HRMS (positive ESI):  $[\text{M}+\text{H}]^+$  calcd for  $\text{C}_{32}\text{H}_{29}\text{N}_2\text{O}$  457.2274, found 457.2272.

### 3-methyl-5-phenyl-*N*-(quinolin-8-yl)pentanamide (3eb)

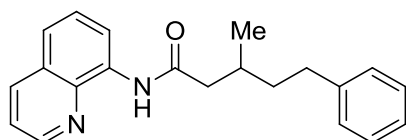

Purified by preparative TLC on silica gel (dichloromethane/ethyl acetate = 120/1) to provide **3eb** as a yellow oil (36.3 mg, 57%).  $^1\text{H}$  NMR (400 MHz,  $\text{CDCl}_3$ )  $\delta$  9.80 (s, 1H), 8.85 – 8.75 (m, 2H), 8.13 (dd,  $J = 1.6, 8.3$  Hz, 1H), 7.57 – 7.46 (m, 2H), 7.43 (dd,  $J = 4.2, 8.3$  Hz, 1H), 7.29 – 7.22 (m, 2H), 7.22 – 7.12 (m, 3H), 2.81 – 2.57 (m, 3H), 2.45 – 2.34 (m, 1H), 2.32 – 2.18 (m, 1H), 1.87 – 1.73 (m, 1H), 1.68 – 1.53 (m, 1H), 1.12 (d,  $J = 6.6$  Hz, 3H).

### 5-(4-methoxyphenyl)-3,3-dimethyl-*N*-(quinolin-8-yl)pentanamide (3fa)

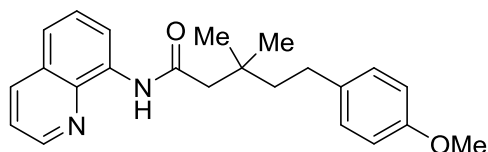

Purified by preparative TLC on silica gel (petroleum ether/ethyl acetate = 15/1) to provide **3fa** as a yellow oil (27.5 mg, 38%).  $^1\text{H}$  NMR (400 MHz,  $\text{CDCl}_3$ )  $\delta$  9.79 (s, 1H), 8.82 – 8.75 (m, 2H), 8.15 (dd,  $J = 1.6, 8.3$  Hz, 1H), 7.56 – 7.47 (m, 2H), 7.44 (dd,  $J = 4.2, 8.3$  Hz, 1H), 7.16 – 7.09 (m, 2H), 6.83 – 6.77 (m, 2H), 3.76 (s, 3H), 2.70 – 2.61 (m, 2H), 2.50 (s, 2H), 1.77 – 1.71 (m, 2H), 1.20 (s, 6H).  $^{13}\text{C}$  NMR (100 MHz,  $\text{CDCl}_3$ )  $\delta$  170.4, 157.7, 148.2, 138.4, 136.4, 135.0, 134.6, 129.3, 128.0, 127.4, 121.6, 121.4, 116.4, 113.8, 55.3, 50.1, 44.9, 34.0, 30.0, 27.6. HRMS (positive ESI):  $[\text{M}+\text{H}]^+$  calcd for  $\text{C}_{23}\text{H}_{27}\text{N}_2\text{O}_2$  363.2067, found 363.2072.

### 2-methyl-3,5-diphenyl-*N*-(quinolin-8-yl)pentanamide (**3gb**)

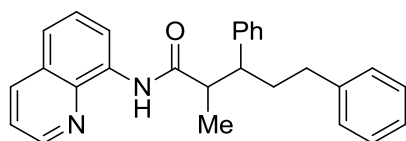

Purified by preparative TLC on silica gel (petroleum ether/ethyl acetate = 15/1) to provide **3gb** as a yellow oil (30.8 mg, 39%).  $^1\text{H}$  NMR (400 MHz,  $\text{CDCl}_3$ )  $\delta$  9.44 (s, 1H), 8.65 (dd,  $J = 1.6, 4.2$  Hz, 1H), 8.54 (dd,  $J = 2.1, 6.9$  Hz, 1H), 8.02 (dd,  $J = 1.6, 8.3$  Hz, 1H), 7.41 – 7.29 (m, 3H), 7.25 – 7.19 (m, 2H), 7.19 – 7.10 (m, 4H), 7.10 – 6.95 (m, 4H), 3.04 – 2.93 (m, 1H), 2.81 – 2.71 (m, 1H), 2.44 – 2.27 (m, 2H), 2.23 – 2.12 (m, 1H), 2.01 – 1.87 (m, 1H), 1.32 (d,  $J = 6.8$  Hz, 3H).

### 5-(4-methoxyphenyl)-*N*-(quinolin-8-yl)hexanamide (**3ha**)

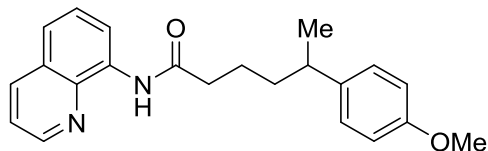

Purified by preparative TLC on silica gel (petroleum ether/ethyl acetate = 12/1) to provide **3ha** as a brown solid (35.5 mg, 51%), mp = 72–74 °C.  $^1\text{H}$  NMR (600 MHz,  $\text{CDCl}_3$ )  $\delta$  9.75 (s, 1H), 8.82 – 8.74 (m, 2H), 8.15 (d,  $J = 8.2$  Hz, 1H), 7.55 – 7.47 (m, 2H), 7.44 (dd,  $J = 4.1, 8.1$  Hz, 1H), 7.12 (d,  $J = 8.1$  Hz, 2H), 6.83 (d,  $J = 8.2$  Hz, 2H), 3.77 (s, 3H), 2.75 – 2.69 (m, 1H), 2.55 – 2.48 (m, 2H), 1.83 – 1.74 (m, 1H), 1.72 – 1.64 (m, 3H), 1.25 (d,  $J = 6.9$  Hz, 3H).  $^{13}\text{C}$  NMR (100 MHz,  $\text{CDCl}_3$ )  $\delta$  171.7, 157.8, 148.1, 139.4, 138.3, 136.4, 134.6, 128.0, 127.8, 127.5, 121.6, 121.3, 116.4, 113.8, 55.2, 39.1, 38.2, 38.1, 23.9, 22.5. HRMS (positive ESI):  $[\text{M}+\text{H}]^+$  calcd for  $\text{C}_{22}\text{H}_{25}\text{N}_2\text{O}_2$  349.1911, found 349.1922.



### 5-phenyl-*N*-(quinolin-8-yl)hexanamide (3hb)

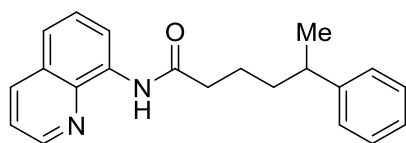

Purified by preparative TLC on silica gel (petroleum ether/ethyl acetate = 12/1) to provide **3hb** as a yellow oil (29.3 mg, 46%).  $^1\text{H}$  NMR (600 MHz,  $\text{CDCl}_3$ )  $\delta$  9.76 (s, 1H), 8.82 – 8.74 (m, 2H), 8.15 (d,  $J$  = 8.2 Hz, 1H), 7.55 – 7.46 (m, 2H), 7.44 (dd,  $J$  = 4.1, 8.0 Hz, 1H), 7.30 – 7.24 (m, 2H), 7.23 – 7.14 (m, 3H), 2.80 – 2.72 (m, 1H), 2.55 – 2.47 (m, 2H), 1.85 – 1.76 (m, 1H), 1.75 – 1.61 (m, 3H), 1.28 (d,  $J$  = 6.9 Hz, 3H).  $^{13}\text{C}$  NMR (100 MHz,  $\text{CDCl}_3$ )  $\delta$  171.7, 148.1, 147.3, 138.3, 136.4, 134.5, 128.4, 128.0, 127.5, 127.0, 126.0, 121.6, 121.3, 116.4, 39.9, 38.2, 37.9, 23.9, 22.3. HRMS (positive ESI):  $[\text{M}+\text{H}]^+$  calcd for  $\text{C}_{21}\text{H}_{23}\text{N}_2\text{O}$  319.1805, found 319.1807.

### 5-([1,1'-biphenyl]-4-yl)-*N*-(quinolin-8-yl)hexanamide (3hi)

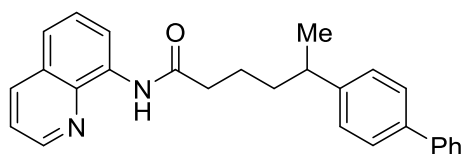

Purified by preparative TLC on silica gel (petroleum ether/ethyl acetate = 12/1) to provide **3hi** as a brown oil (34.7 mg, 44%).  $^1\text{H}$  NMR (600 MHz,  $\text{CDCl}_3$ )  $\delta$  9.77 (s, 1H), 8.80 – 8.73 (m, 2H), 8.14 (d,  $J$  = 8.2 Hz, 1H), 7.57 (d,  $J$  = 7.6 Hz, 2H), 7.55 – 7.47 (m, 4H), 7.45 – 7.39 (m, 3H), 7.33 – 7.24 (m, 3H), 2.86 – 2.77 (m, 1H), 2.58 – 2.51 (m, 2H), 1.90 – 1.80 (m, 1H), 1.80 – 1.68 (m, 3H), 1.31 (d,  $J$  = 6.8 Hz, 3H).  $^{13}\text{C}$  NMR (100 MHz,  $\text{CDCl}_3$ )  $\delta$  171.7, 148.1, 146.4, 141.2, 138.9, 138.3, 136.4, 134.5, 128.7, 128.0, 127.5, 127.4, 127.2, 127.02, 126.96, 121.6, 121.4, 116.4, 39.6, 38.2, 37.9, 23.9, 22.3. HRMS (positive ESI):  $[\text{M}+\text{H}]^+$  calcd for  $\text{C}_{27}\text{H}_{27}\text{N}_2\text{O}$  395.2118, found 395.2131.

### 5-(4-methoxyphenyl)-*N*-(quinolin-8-yl)heptanamide (3ia)

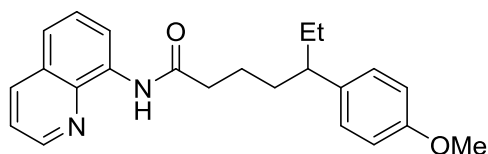

Purified by preparative TLC on silica gel (petroleum ether/ethyl acetate = 25/1) to provide **3ia** as a yellow oil (47.1 mg, 65%).  $^1\text{H}$  NMR (400 MHz,  $\text{CDCl}_3$ )  $\delta$  9.74 (s, 1H), 8.82 – 8.72 (m, 2H), 8.14 (dd,  $J$  = 1.6, 8.3 Hz, 1H), 7.56 – 7.46 (m, 2H), 7.44 (dd,  $J$  = 4.2, 8.3 Hz, 1H), 7.10– 7.02 (m, 2H), 6.87 – 6.78 (m, 2H), 3.77 (s, 3H), 2.52 – 2.38 (m, 3H), 1.83 – 1.57 (m, 5H), 1.57 – 1.46 (m, 1H), 0.76 (t,  $J$  = 7.4 Hz, 3H).  $^{13}\text{C}$  NMR (150 MHz,  $\text{CDCl}_3$ )  $\delta$  171.7,

157.8, 148.1, 138.3, 137.4, 136.4, 134.6, 128.6, 127.9, 127.5, 121.6, 121.3, 116.4, 113.7, 55.2, 46.9, 38.3, 36.2, 29.8, 23.9, 12.2. HRMS (positive ESI):  $[M+H]^+$  calcd for  $C_{23}H_{27}N_2O_2$  363.2067, found 363.2070.

### 5-phenyl-*N*-(quinolin-8-yl)heptanamide (**3ib**)

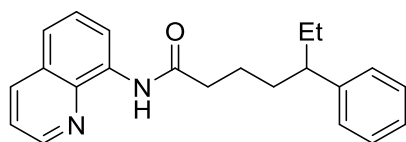

Purified by preparative TLC on silica gel (petroleum ether/ethyl acetate = 15/1) to provide **3ib** as a yellow oil (47.9 mg, 72%).  $^1H$  NMR (400 MHz,  $CDCl_3$ )  $\delta$  9.73 (s, 1H), 8.80 – 8.73 (m, 2H), 8.12 (dd,  $J$  = 1.6, 8.3 Hz, 1H), 7.54 – 7.44 (m, 2H), 7.41 (dd,  $J$  = 4.2, 8.3 Hz, 1H), 7.31 – 7.23 (m, 2H), 7.19 – 7.13 (m, 3H), 2.56 – 2.41 (m, 3H), 1.87 – 1.50 (m, 6H), 0.77 (t,  $J$  = 7.4 Hz, 3H).  $^{13}C$  NMR (100 MHz,  $CDCl_3$ )  $\delta$  171.7, 148.1, 145.4, 138.3, 136.4, 134.5, 128.3, 128.0, 127.4, 127.5, 126.0, 121.6, 121.4, 116.4, 47.8, 38.3, 36.1, 29.7, 23.9, 12.2. HRMS (positive ESI):  $[M+H]^+$  calcd for  $C_{22}H_{25}N_2O$  333.1961, found 333.1964.

### 5-(3-methoxyphenyl)-*N*-(quinolin-8-yl)heptanamide (**3in**)

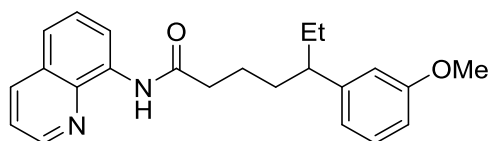

Purified by preparative TLC on silica gel (petroleum ether/ethyl acetate = 15/1) to provide **3in** as a brown oil (47.1 mg, 65%).  $^1H$  NMR (600 MHz,  $CDCl_3$ )  $\delta$  9.74 (s, 1H), 8.81 – 8.73 (m, 2H), 8.15 (dd,  $J$  = 1.3, 8.2 Hz, 1H), 7.54 – 7.47 (m, 2H), 7.44 (dd,  $J$  = 4.2, 8.2 Hz, 1H), 7.22 – 7.17 (m, 2H), 6.77 (d,  $J$  = 7.5 Hz, 1H), 6.73 – 6.70 (m, 2H), 3.78 (s, 3H), 2.50 (t,  $J$  = 7.1 Hz, 2H), 2.47 – 2.42 (m, 1H), 1.82 – 1.52 (m, 6H), 0.78 (t,  $J$  = 7.4 Hz, 3H).  $^{13}C$  NMR (150 MHz,  $CDCl_3$ )  $\delta$  171.7, 159.6, 148.1, 147.2, 138.4, 136.4, 134.6, 129.2, 127.9, 127.4, 121.6, 121.3, 120.3, 116.4, 113.6, 110.9, 55.1, 47.9, 38.3, 36.0, 29.6, 23.9, 12.2. HRMS (positive ESI):  $[M+H]^+$  calcd for  $C_{23}H_{27}N_2O_2$  363.2067, found 363.2073.

### 5-cyclohexyl-5-(4-methoxyphenyl)-*N*-(quinolin-8-yl)pentanamide (**3ja**)

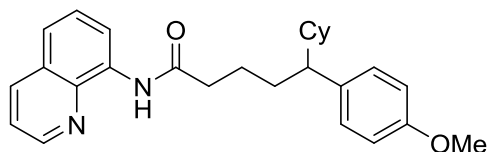

Purified by preparative TLC on silica gel (petroleum ether/ethyl acetate = 15/1) to provide **3ja** as a yellow oil (55.8 mg, 67%).  $^1H$  NMR (600 MHz,  $CDCl_3$ )  $\delta$  9.72 (s, 1H), 8.81 – 8.73 (m, 2H), 8.17 – 8.13 (m, 1H), 7.54 – 7.47 (m, 2H), 7.45 (dd,  $J$  = 4.2, 8.2 Hz, 1H), 7.03 (d,  $J$

= 8.5 Hz, 2H), 6.81 (d,  $J = 8.5$  Hz, 2H), 3.77 (s, 3H), 2.53 – 2.42 (m, 2H), 2.35 – 2.29 (m, 1H), 1.94 – 1.83 (m, 2H), 1.71 – 1.56 (m, 6H), 1.47 – 1.37 (m, 2H), 1.24 – 1.14 (m, 1H), 1.14 – 0.99 (m, 2H), 0.94 – 0.84 (m, 1H), 0.80 – 0.71 (m, 1H).  $^{13}\text{C}$  NMR (150 MHz,  $\text{CDCl}_3$ )  $\delta$  171.8, 157.7, 148.1, 138.4, 136.4, 136.2, 134.6, 129.3, 128.0, 127.5, 121.6, 121.3, 116.4, 113.4, 55.2, 51.2, 43.3, 38.3, 32.3, 31.5, 30.9, 26.61, 26.55, 24.1. HRMS (positive ESI):  $[\text{M}+\text{H}]^+$  calcd for  $\text{C}_{27}\text{H}_{33}\text{N}_2\text{O}_2$  417.2537, found 417.2538.

### 5-cyclohexyl-5-phenyl-*N*-(quinolin-8-yl)pentanamide (3jb)

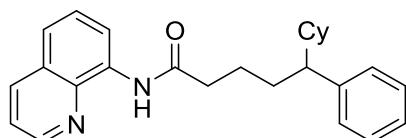

Purified by preparative TLC on silica gel (petroleum ether/ethyl acetate = 20/1) to provide **3jb** as a yellow oil (43.3 mg, 56%).  $^1\text{H}$  NMR (600 MHz,  $\text{CDCl}_3$ )  $\delta$  9.72 (s, 1H), 8.81 – 8.72 (m, 2H), 8.15 (d,  $J = 8.1$  Hz, 1H), 7.54 – 7.47 (m, 2H), 7.46 – 7.43 (m, 1H), 7.29 – 7.23 (m, 2H), 7.19 – 7.10 (m, 3H), 2.53 – 2.42 (m, 2H), 2.39 – 2.33 (m, 1H), 1.97 – 1.87 (m, 2H), 1.74 – 1.65 (m, 2H), 1.62 – 1.55 (m, 4H), 1.50 – 1.39 (m, 2H), 1.24 – 1.15 (m, 1H), 1.14 – 1.00 (m, 2H), 0.96 – 0.86 (m, 1H), 0.82 – 0.73 (m, 1H).  $^{13}\text{C}$  NMR (150 MHz,  $\text{CDCl}_3$ )  $\delta$  171.7, 148.1, 144.2, 138.4, 136.4, 134.6, 128.6, 128.0, 127.9, 127.5, 125.8, 121.54, 121.3, 116.4, 52.1, 43.2, 38.3, 32.2, 31.4, 31.0, 26.6, 26.5, 24.1. HRMS (positive ESI):  $[\text{M}+\text{H}]^+$  calcd for  $\text{C}_{26}\text{H}_{31}\text{N}_2\text{O}$  387.2431, found 387.2438.

### 5-(4-chlorophenyl)-5-cyclohexyl-*N*-(quinolin-8-yl)pentanamide (3jd)

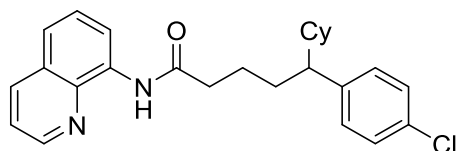

Purified by preparative TLC on silica gel (petroleum ether/ethyl acetate = 15/1) to provide **3jd** as a pale yellow oil (53.1 mg, 63%).  $^1\text{H}$  NMR (400 MHz,  $\text{CDCl}_3$ )  $\delta$  9.72 (s, 1H), 8.77 (dd,  $J = 1.6, 4.2$  Hz, 1H), 8.76 – 8.71 (m, 1H), 8.14 (dd,  $J = 1.2, 8.2$  Hz, 1H), 7.56 – 7.46 (m, 2H), 7.43 (dd,  $J = 4.2, 8.3$  Hz, 1H), 7.24 – 7.18 (m, 2H), 7.08 – 7.02 (m, 2H), 2.55 – 2.39 (m, 2H), 2.39 – 2.29 (m, 1H), 1.97 – 1.82 (m, 2H), 1.78 – 1.51 (m, 6H), 1.47 – 1.35 (m, 2H), 1.28 – 1.12 (m, 1H), 1.12 – 0.98 (m, 2H), 0.94 – 0.81 (m, 1H), 0.80 – 0.66 (m, 1H).  $^{13}\text{C}$  NMR (100 MHz,  $\text{CDCl}_3$ )  $\delta$  171.5, 148.1, 142.7, 138.3, 136.4, 134.5, 131.5, 129.8, 128.2, 127.9, 127.4, 121.6, 121.4, 116.4, 51.6, 43.2, 38.2, 32.1, 31.4, 30.9, 26.52, 26.46, 24.0. HRMS (positive ESI):  $[\text{M}+\text{H}]^+$  calcd for  $\text{C}_{26}\text{H}_{30}\text{ClN}_2\text{O}$  421.2041, found 421.2044.

**5-cyclohexyl-*N*-(quinolin-8-yl)-5-(4-(trifluoromethyl)phenyl)pentanamide (3jg)**

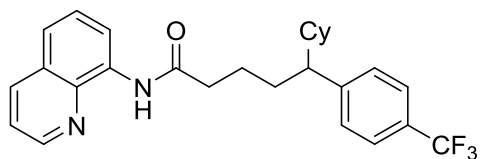

Purified by preparative TLC on silica gel (petroleum ether/ethyl acetate = 15/1) to provide **3jg** as a pale yellow oil (59.9 mg, 66%).  $^1\text{H}$  NMR (400 MHz,  $\text{CDCl}_3$ )  $\delta$  9.73 (s, 1H), 8.80 – 8.70 (m, 2H), 8.13 (dd,  $J = 1.1, 8.2$  Hz, 1H), 7.54 – 7.45 (m, 4H), 7.43 (dd,  $J = 4.2, 8.3$  Hz, 1H), 7.23 (d,  $J = 8.0$  Hz, 2H), 2.56 – 2.39 (m, 3H), 2.00 – 1.85 (m, 2H), 1.76 – 1.65 (m, 2H), 1.64 – 1.42 (m, 5H), 1.41 – 1.34 (m, 1H), 1.28 – 1.14 (m, 1H), 1.13 – 0.98 (m, 2H), 0.97 – 0.84 (m, 1H), 0.81 – 0.68 (m, 1H).  $^{13}\text{C}$  NMR (100 MHz,  $\text{CDCl}_3$ )  $\delta$  171.4, 148.5, 148.1, 138.3, 136.4, 134.5, 128.8, 128.2 (q,  $^2J_{\text{CF}} = 32.3$  Hz), 128.0, 127.4, 125.0 (q,  $^3J_{\text{CF}} = 3.8$  Hz), 124.4 (q,  $^1J_{\text{CF}} = 272.9$  Hz), 121.6, 121.4, 116.4, 52.2, 43.1, 38.2, 32.0, 31.3, 31.0, 26.49, 26.47, 26.42, 24.0.  $^{19}\text{F}$  NMR (376 MHz,  $\text{CDCl}_3$ )  $\delta$  -62.15. HRMS (positive ESI):  $[\text{M}+\text{H}]^+$  calcd for  $\text{C}_{27}\text{H}_{30}\text{F}_3\text{N}_2\text{O}$  455.2305, found 455.2304.

***N*-(quinolin-8-yl)pentanamide (5a)**

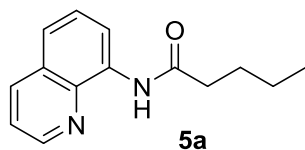

$^1\text{H}$  NMR (400 MHz,  $\text{CDCl}_3$ )  $\delta$  9.81 (s, 1H), 8.84 – 8.75 (m, 2H), 8.16 (dd,  $J = 8.3, 1.6$  Hz, 1H), 7.57 – 7.47 (m, 2H), 7.45 (dd,  $J = 8.3, 4.2$  Hz, 1H), 2.57 (t,  $J = 7.5$  Hz, 2H), 1.87 – 1.76 (m, 2H), 1.53 – 1.40 (m, 2H), 0.98 (t,  $J = 7.4$  Hz, 3H).

## 2.4 Scale-up Reaction and Removal of Directing Group

Scale-up reaction:

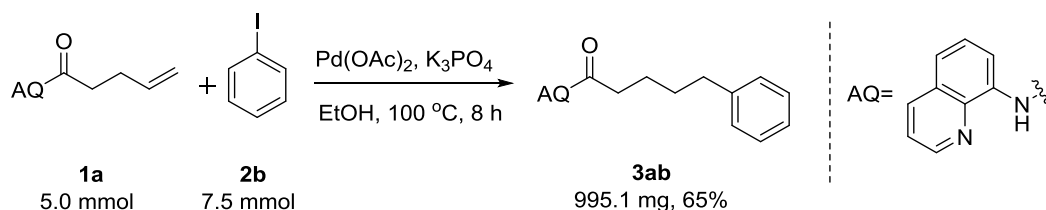

*Procedure for scale-up reaction:* To a 150 mL pressure tube **1a** (5.0 mmol, 1.31 g), **2b** (7.5 mmol, 1.53 g), Pd(OAc)<sub>2</sub> (5 mol%, 56.1 mg), K<sub>3</sub>PO<sub>4</sub> (7.5 mmol, 1.59 g) and EtOH (25 mL) were added sequentially. The reaction was stirred in a *pre-warmed* 100 °C oil bath for 8 hours under air. Then the reaction was quenched with ethyl acetate and filtered through a pad of celite. The filtrate was concentrated and purified by preparative TLC on silica gel plates (petroleum ether/ethyl acetate = 20/1) to give the desired product **3ab** (995.1 mg, 65%).

Removal of directing group:

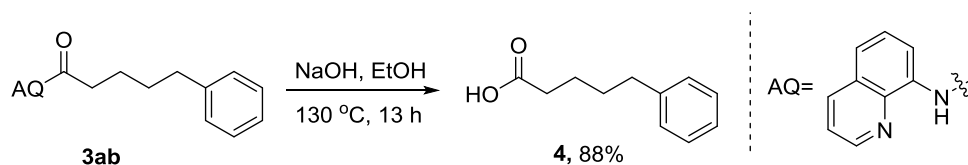

*Procedure for removal of directing group (taking 3ab as an example):* To a 150 mL pressure tube were added a suitable size magnet, **3ab** (1.0 mmol, 304.4 mg), sodium hydroxide (15.0 mmol, 600 mg), ethanol (20 mL) sequentially. The reaction was stirred vigorously in a *pre-warmed* 130 °C oil bath for 13 hours under air. After completion of the reaction, the reaction mixture was cooled to room temperature. Aqueous sodium hydroxide solution (20 mL, 1M) and dichloromethane (20 mL) were added to the mixture, and then transferred to a separating funnel to carry out liquid separation. The aqueous phase was separated and the organic phase was extracted with sodium hydroxide (1M, 15 mL, ×3). All aqueous phases were combined and then washed with 20 mL of dichloromethane. The aqueous phase was then acidified to pH = 1 with hydrochloric acid (1M). The acidified aqueous phase was extracted with ethyl acetate (20 mL, ×3), and the organic phases were combined and washed once with 20 mL of brine. The organic phase was dried over anhydrous sodium sulfate, concentrated under reduced pressure to afford 5-phenylpentanoic acid **4** (157.1 mg, 88%).

## 2.5 Studies on Mechanism

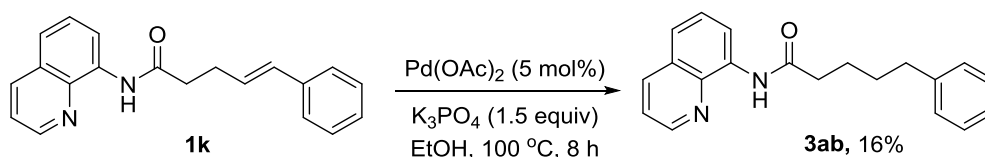

To a 35 mL pressure tube **1k** (0.20 mmol, 60.5 mg), Pd(OAc)<sub>2</sub> (5.0 mol%, 2.2 mg), K<sub>3</sub>PO<sub>4</sub> (0.30 mmol, 63.7 mg) and EtOH (1.0 mL) were added sequentially. The reaction was stirred in a *pre*-warmed 100 °C oil bath for 8 hours. Then the reaction was quenched with ethyl acetate and filtered through a pad of celite. The filtrate was concentrated and purified by preparative TLC on silica gel plates (petroleum ether/ethyl acetate = 15/1), affording **3ab** (9.7 mg, 16%).

Deuteration experiments:

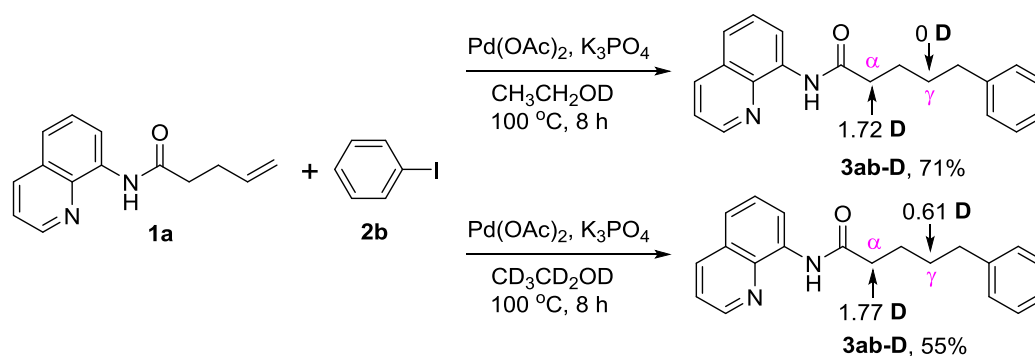

To a 35 mL pressure tube **1a** (0.2 mmol, 45.3 mg), **2b** (0.3 mmol, 61.2 mg), Pd(OAc)<sub>2</sub> (5 mol%, 2.2 mg), K<sub>3</sub>PO<sub>4</sub> (0.3 mmol, 63.7 mg) and D-labeling solvent (1.0 mL) were added sequentially. The reaction was stirred in a *pre*-warmed 100 °C oil bath for 8 hours. Then the reaction was quenched with ethyl acetate and filtered through a pad of celite. The filtrate was concentrated and purified by preparative TLC on silica gel plates (petroleum ether/ethyl acetate = 15/1), affording compound **3ab-D** (CH<sub>3</sub>CH<sub>2</sub>OD) which was partially deuterated at the  $\alpha$ -position in 71% isolated yield or **3ab-D** (CD<sub>3</sub>CD<sub>2</sub>OD) which was partially deuterated at both the  $\alpha$ - and  $\gamma$ -positions in 55% isolated yield. The products from deuteration experiments were confirmed by <sup>1</sup>H NMR.

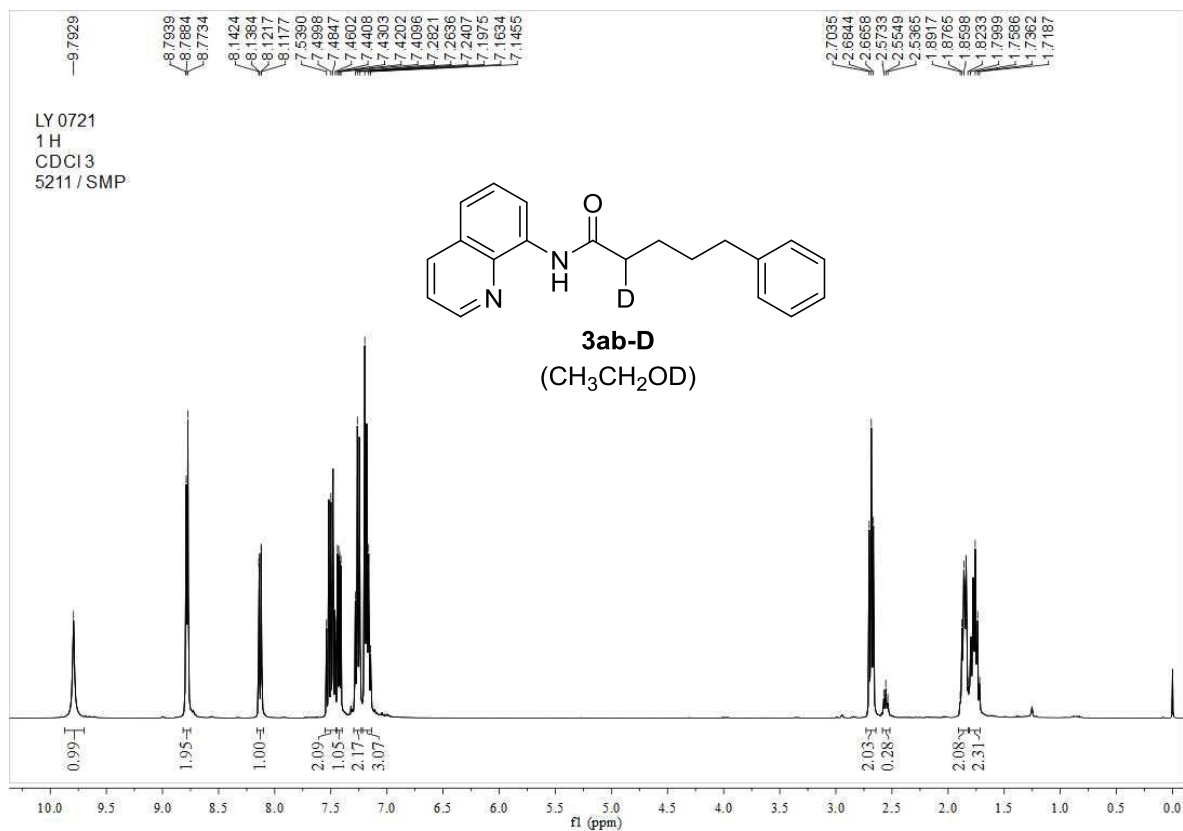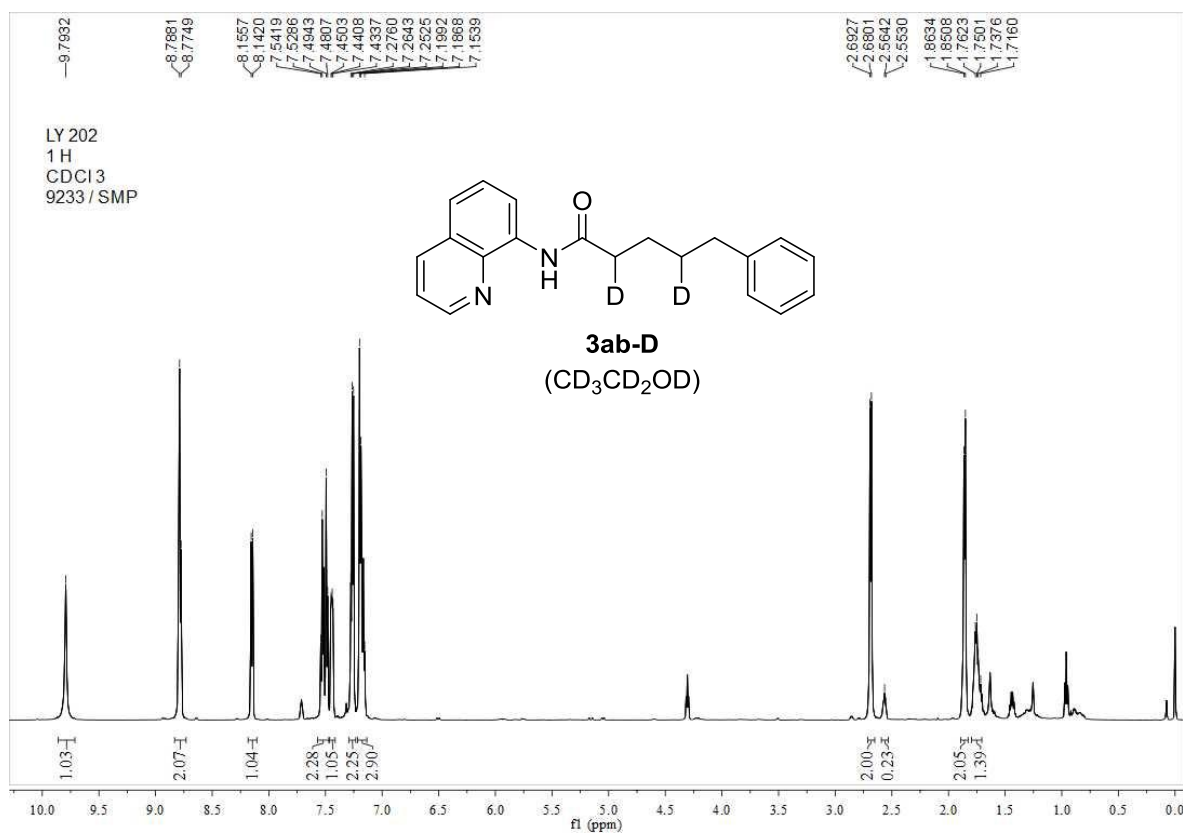

## 2.6 Crystal Reports for 3ai

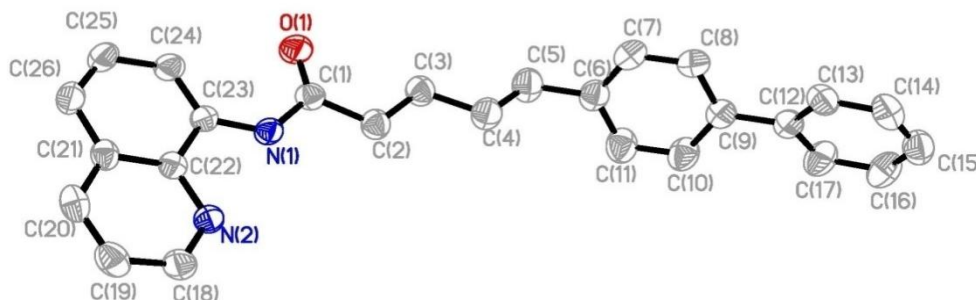

**Figure S1. Molecular structure of 3ai. Hydrogen atoms are omitted for clarity.**

Crystals of **3ai** (CCDC 1914045) were obtained by recrystallization from petroleum ether/ethyl acetate at ambient temperature. The data were collected on a Xcalibur, Eos, Gemini diffractometer with graphite-monochromated Cu K $\alpha$  radiation ( $\lambda = 1.54184 \text{ \AA}$ ). The structure was solved by direct methods using the SHELXS-97 program, and all non-hydrogen atoms were refined anisotropically on  $F^2$  by the full-matrix least-squares technique, which used the SHELXL-97 crystallographic software package. The hydrogen atoms were included but not refined.

**Table S6 Summary of crystal structure determination for 3ai**

|                                    |  | <b>3ai</b>                                       |
|------------------------------------|--|--------------------------------------------------|
| Empirical formula                  |  | C <sub>26</sub> H <sub>24</sub> N <sub>2</sub> O |
| Formula weight                     |  | 380.47                                           |
| Temperature/K                      |  | 293(2)                                           |
| Crystal system                     |  | orthorhombic                                     |
| Space group                        |  | P2 <sub>1</sub> 2 <sub>1</sub> 2 <sub>1</sub>    |
| a/ $\text{\AA}$                    |  | 6.05095(10)                                      |
| b/ $\text{\AA}$                    |  | 8.47658(13)                                      |
| c/ $\text{\AA}$                    |  | 40.4530(7)                                       |
| $\alpha/^\circ$                    |  | 90                                               |
| $\beta/^\circ$                     |  | 90                                               |
| $\gamma/^\circ$                    |  | 90                                               |
| Volume/ $\text{\AA}^3$             |  | 2074.89(6)                                       |
| Z                                  |  | 4                                                |
| $\rho_{\text{calc}}/\text{g/cm}^3$ |  | 1.218                                            |
| $\mu/\text{mm}^{-1}$               |  | 0.579                                            |



|                                             |                                                               |
|---------------------------------------------|---------------------------------------------------------------|
| F(000)                                      | 808.0                                                         |
| Crystal size/mm <sup>3</sup>                | 0.15 × 0.12 × 0.1                                             |
| Radiation                                   | CuK $\alpha$ ( $\lambda$ = 1.54184)                           |
| 2 $\theta$ range for data collection/°      | 8.744 to 141.778                                              |
| Index ranges                                | -7 ≤ h ≤ 4, -10 ≤ k ≤ 10, -49 ≤ l ≤ 47                        |
| Reflections collected                       | 15538                                                         |
| Independent reflections                     | 3974 [R <sub>int</sub> = 0.0287, R <sub>sigma</sub> = 0.0207] |
| Data/restraints/parameters                  | 3974/0/262                                                    |
| Goodness-of-fit on F <sup>2</sup>           | 1.035                                                         |
| Final R indexes [ $I \geq 2\sigma(I)$ ]     | R <sub>1</sub> = 0.0529, wR <sub>2</sub> = 0.1471             |
| Final R indexes [all data]                  | R <sub>1</sub> = 0.0596, wR <sub>2</sub> = 0.1565             |
| Largest diff. peak/hole / e Å <sup>-3</sup> | 0.17/-0.19                                                    |

**Table S7 Bond lengths (Å) for compound 3ai**

|         | Length/Å |         | Length/Å |
|---------|----------|---------|----------|
| C1-C2   | 1.518(5) | C13-C14 | 1.372(6) |
| C1-N1   | 1.358(4) | C14-C15 | 1.347(7) |
| C1-O1   | 1.208(4) | C15-C16 | 1.354(7) |
| C2-C3   | 1.489(5) | C16-C17 | 1.403(6) |
| C3-C4   | 1.531(5) | C18-C19 | 1.392(5) |
| C4-C5   | 1.479(6) | C18-N2  | 1.317(4) |
| C5-C6   | 1.509(6) | C19-C20 | 1.364(5) |
| C6-C7   | 1.373(6) | C20-C21 | 1.404(5) |
| C6-C11  | 1.393(6) | C21-C22 | 1.418(4) |
| C7-C8   | 1.380(6) | C21-C26 | 1.414(5) |
| C8-C9   | 1.383(5) | C22-C23 | 1.436(4) |
| C9-C10  | 1.377(6) | C22-N2  | 1.363(4) |
| C9-C12  | 1.477(5) | C23-C24 | 1.368(4) |
| C10-C11 | 1.391(6) | C23-N1  | 1.393(4) |
| C12-C13 | 1.383(5) | C24-C25 | 1.409(5) |
| C12-C17 | 1.370(6) | C25-C26 | 1.343(6) |

**Table S8 Bond angles for 3ai**

|             | Angle/°  |              | Angle/°  |
|-------------|----------|--------------|----------|
| N1-C1-C2    | 112.5(3) | C15-C14-C13  | 121.2(5) |
| O1-C1-C2    | 123.9(3) | C14-C15-C16  | 118.8(4) |
| O1-C1-N1    | 123.6(3) | C15-C16-C17  | 120.7(5) |
| C3-C2-C1    | 116.2(3) | C12-C17-C16  | 121.0(5) |
| C2-C3-C4    | 113.1(3) | N2-C18-C19   | 124.0(3) |
| C5-C4-C3    | 113.9(3) | C20-C19-C18  | 118.9(3) |
| C4-C5-C6    | 113.9(4) | C19-C20-C21  | 119.9(3) |
| C7-C6-C5    | 120.2(4) | C20-C21-C22  | 117.0(3) |
| C7-C6-C11   | 117.5(4) | C20-C21-C26  | 124.2(3) |
| C11-C6-C5   | 122.1(4) | C26-C21-C22  | 118.8(3) |
| C6-C7-C8    | 121.6(4) | C21-C22-C23  | 119.5(3) |
| C7-C8-C9    | 121.4(4) | N2-C22-C21   | 122.5(3) |
| C8-C9-C12   | 120.6(3) | N2-C22-C23   | 118.0(2) |
| C10-C9-C8   | 117.2(4) | C24-C23-C22  | 119.4(3) |
| C10-C9-C12  | 122.1(3) | C24-C23-N1   | 125.8(3) |
| C9-C10-C11  | 121.7(4) | N1-C23-C22   | 114.8(2) |
| C10-C11-C6  | 120.4(4) | C23-C24-C25  | 119.7(3) |
| C13-C12-C9  | 121.4(3) | C26-C25-C24  | 122.4(3) |
| C17-C12-C9  | 122.1(4) | C25-C26- C21 | 120.1(3) |
| C17-C12-C13 | 116.5(4) | C1-N1-C23    | 129.1(2) |
| C14-C13-C12 | 121.8(4) | C18-N2-C22   | 117.7(3) |

### 3. References

1. M. Liu, P. Yang, M. K. Karunananda, Y. Wang, P. Liu and K. M. Engle, *J. Am. Chem. Soc.*, 2018, **140**, 5805.
2. E. Larionov, M. Nakanishi, D. Katayev, C. Besnard and E. P. Kündig, *Chem. Sci.*, 2013, **4**, 1995.
3. I. I. Strambeanu and M. C. White, *J. Am. Chem. Soc.*, 2013, **135**, 12032.
4. N. Duguet, A. M. Z. Slawin and A. D. Smith, *Org. Lett.*, 2009, **11**, 3858.
5. C. Wang, G. Xiao, T. Guo, Y. Ding, X. Wu and T.-P. Loh, *J. Am. Chem. Soc.*, 2018, **140**, 9332.
6. R. Brimiouille, A. Bauer and T. Bach, *J. Am. Chem. Soc.*, 2015, **137**, 5170.
7. K. Rode, M. Palomba, S. Orgies, R. Rieger and A. Breder, *Synthesis*, 2018, **50**, 3875.
8. F. V. Singh and T. Wirth, *Org. Lett.*, 2011, **13**, 6504.

## 4. NMR Spectra

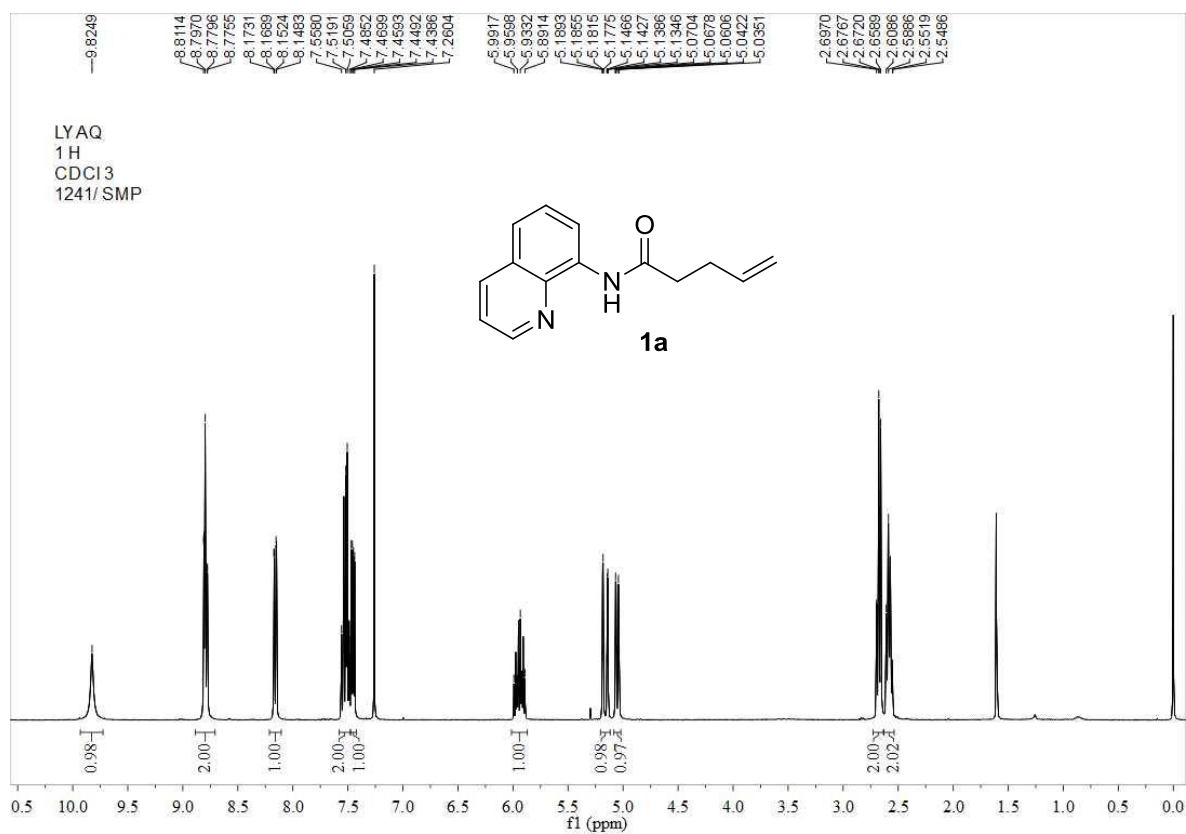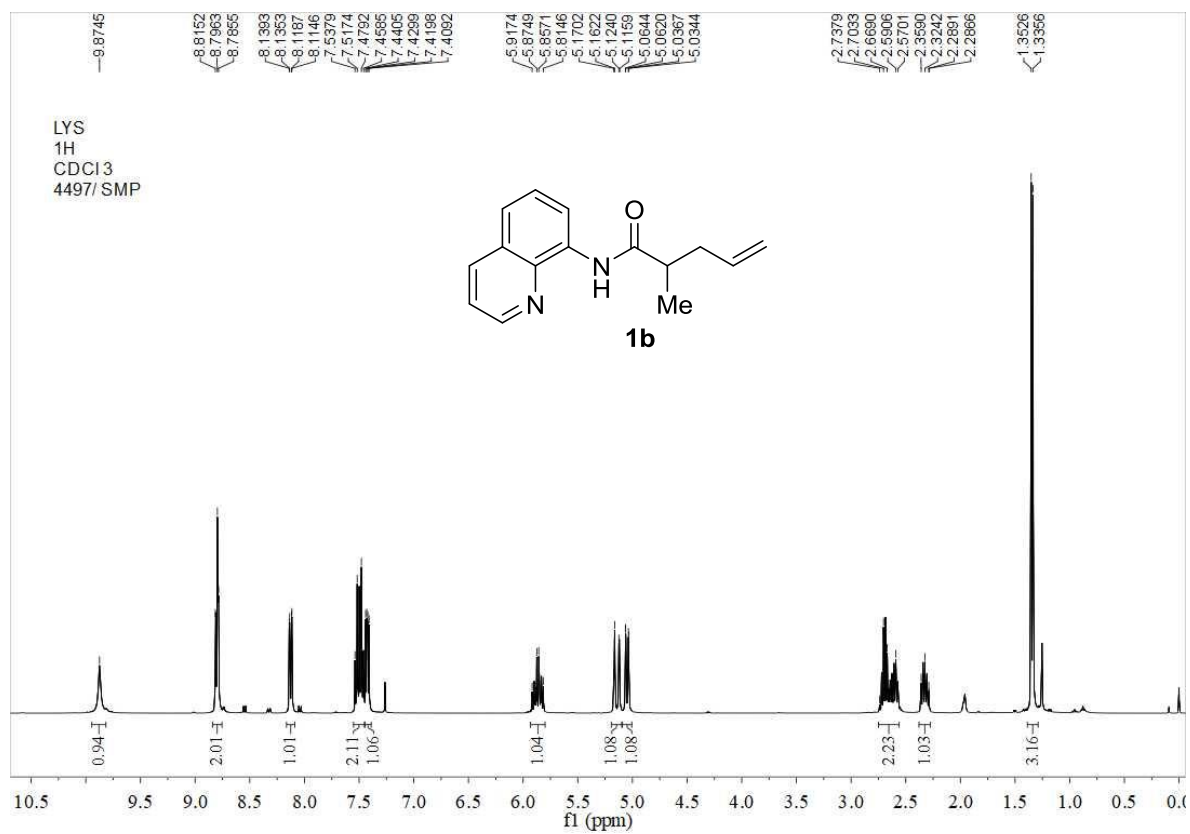

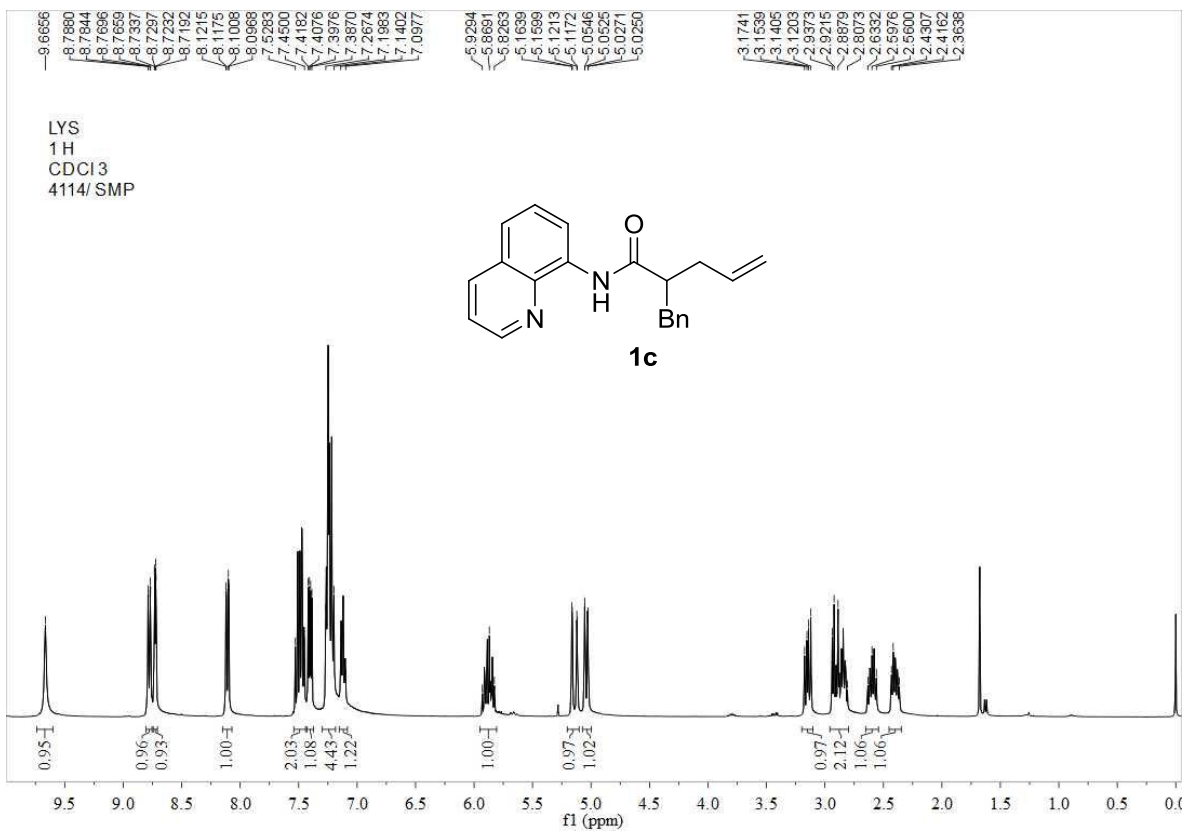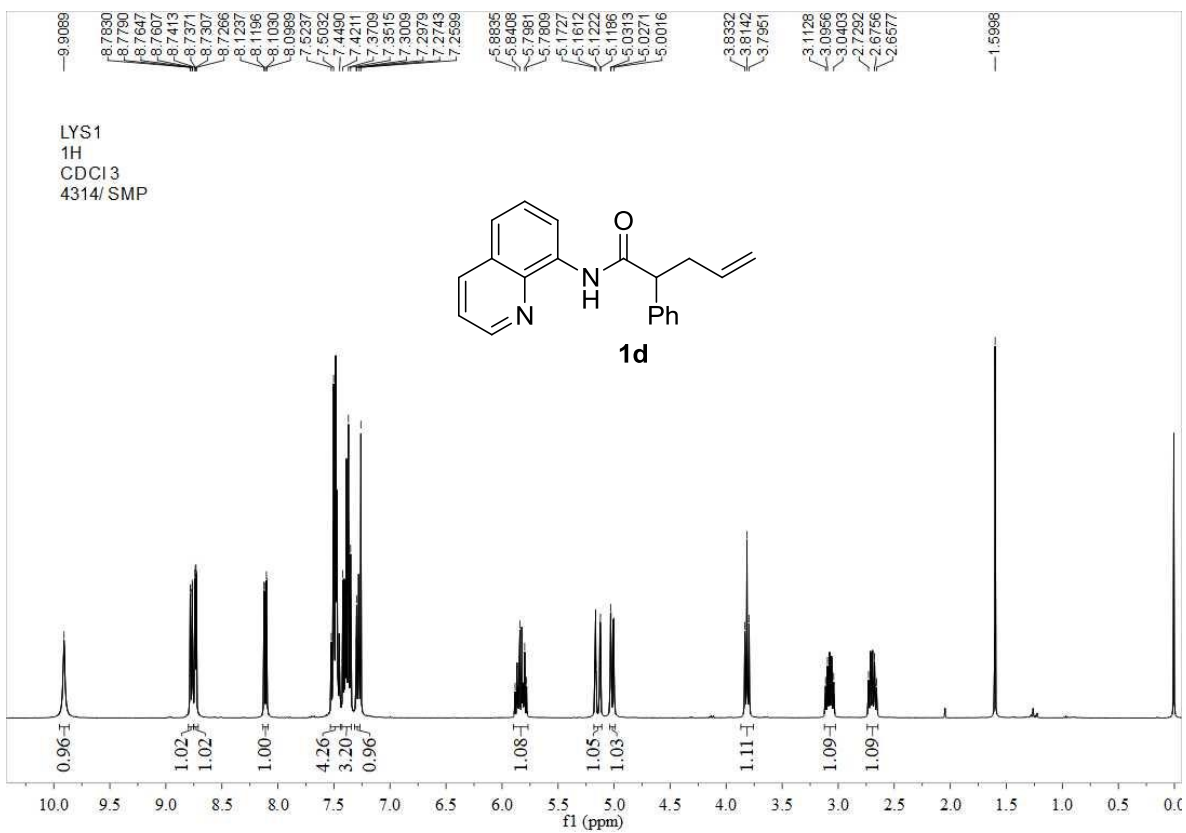

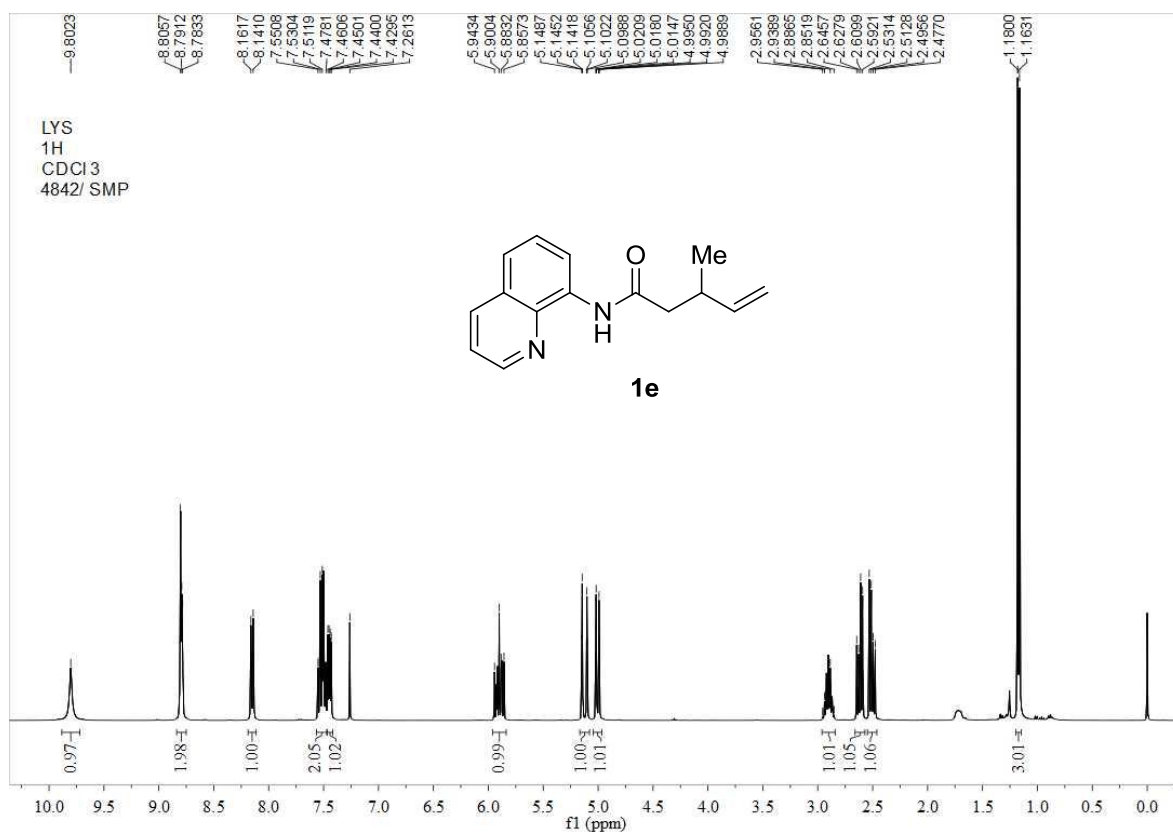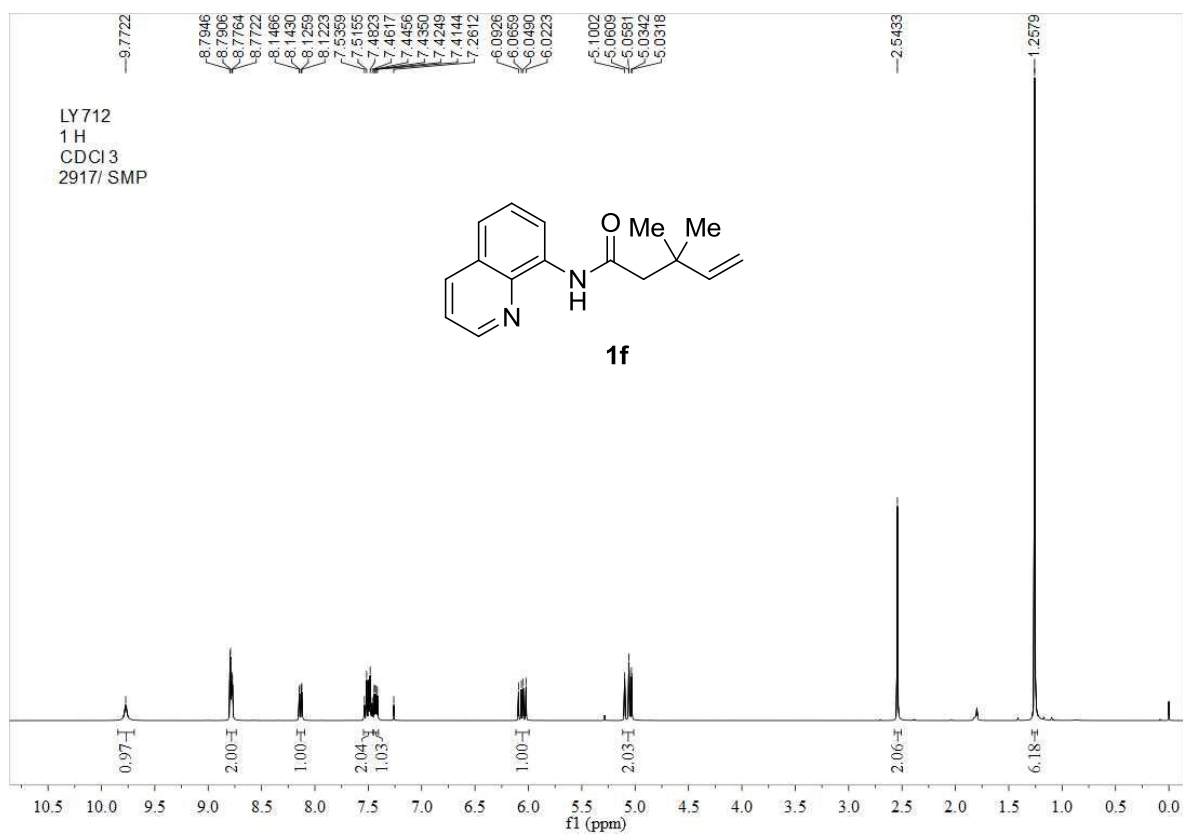

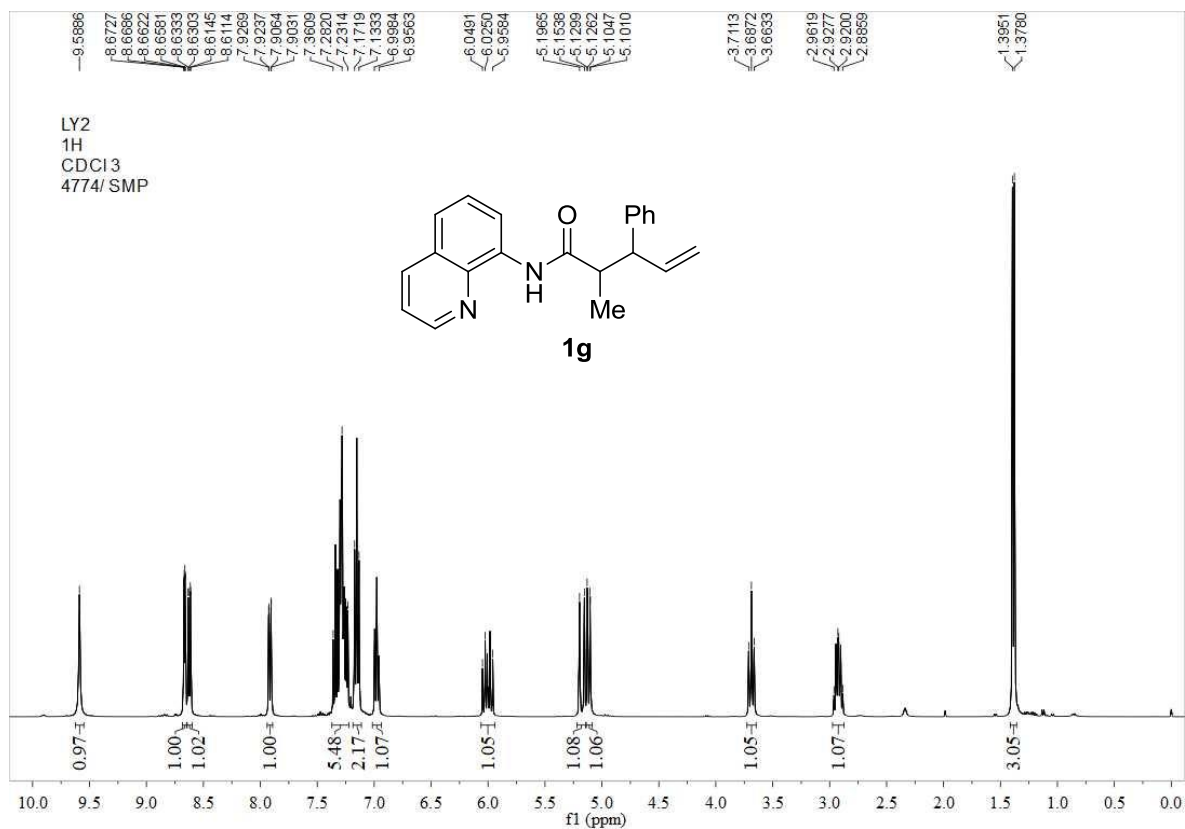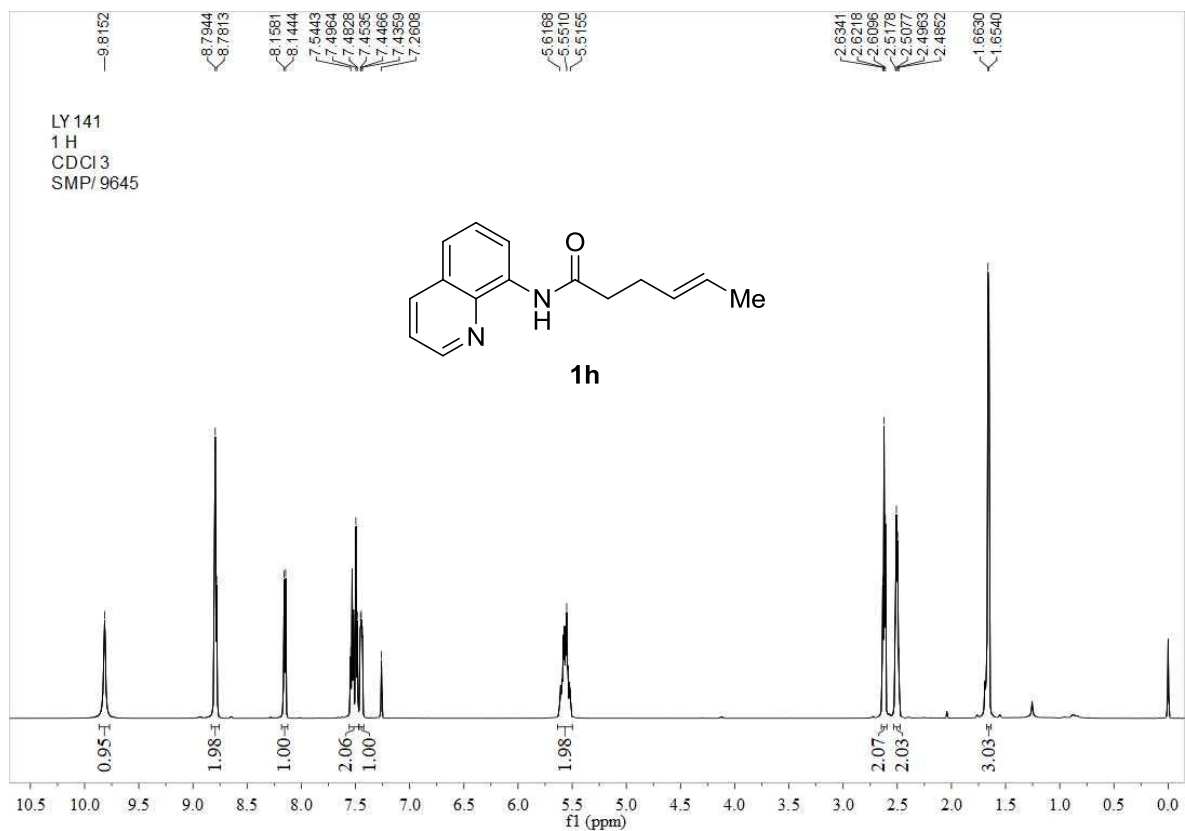

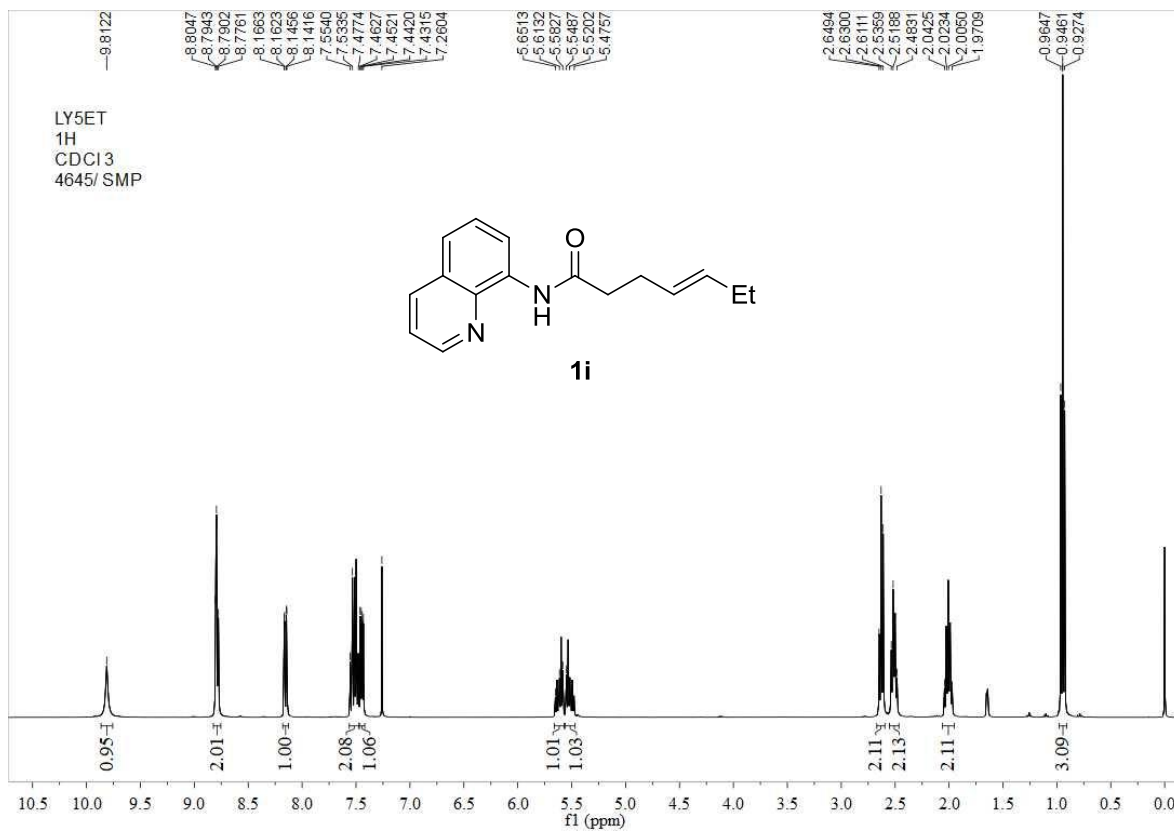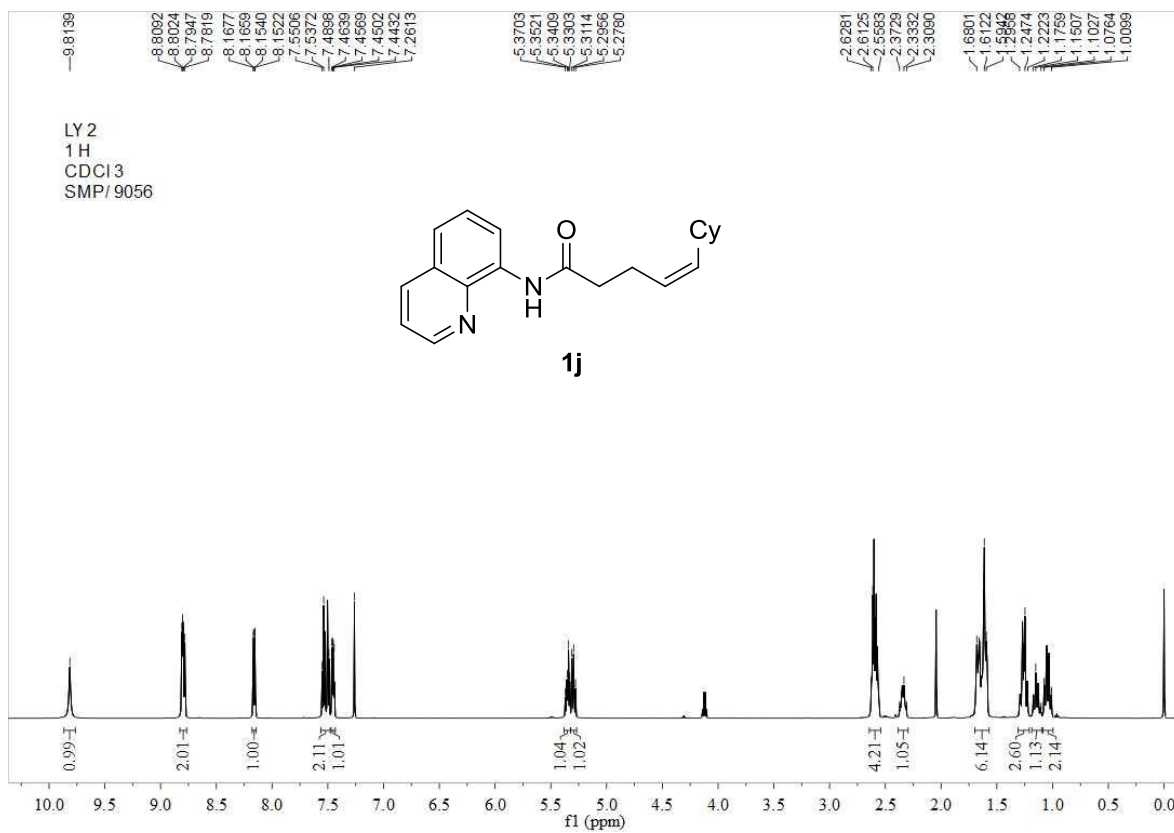



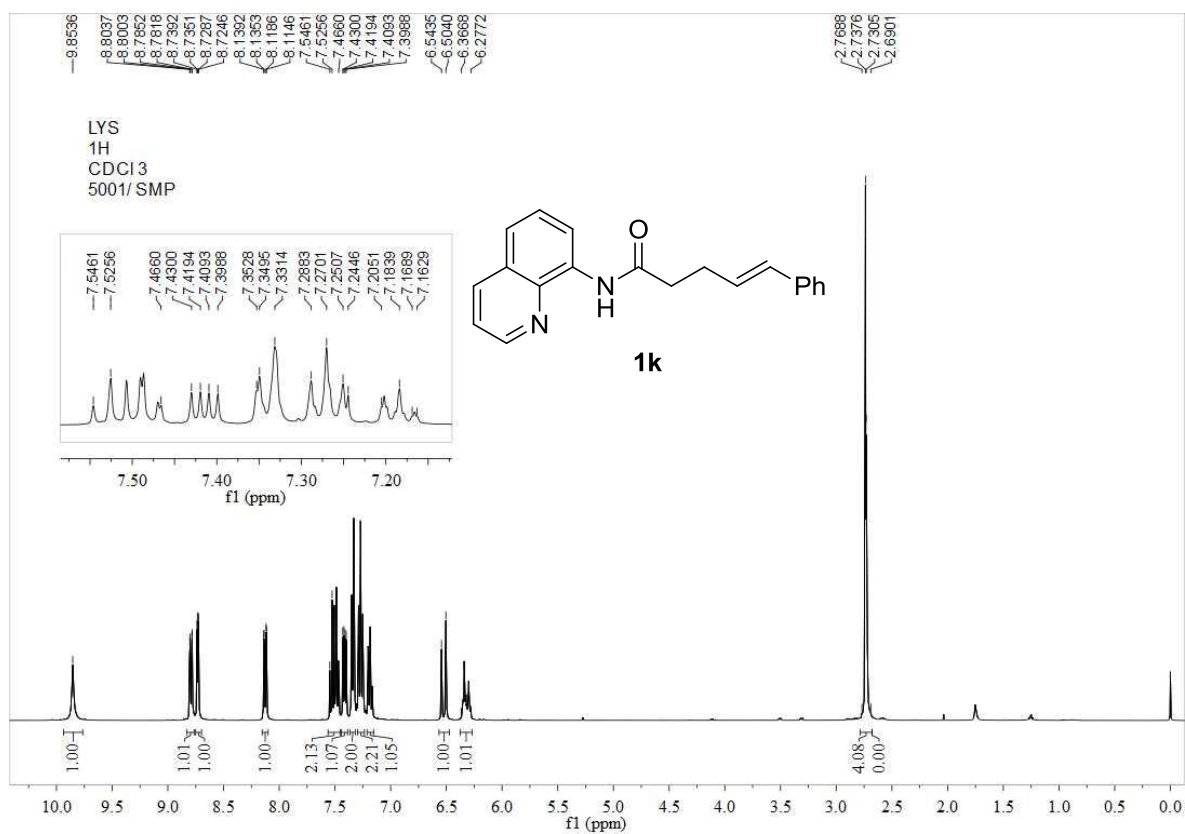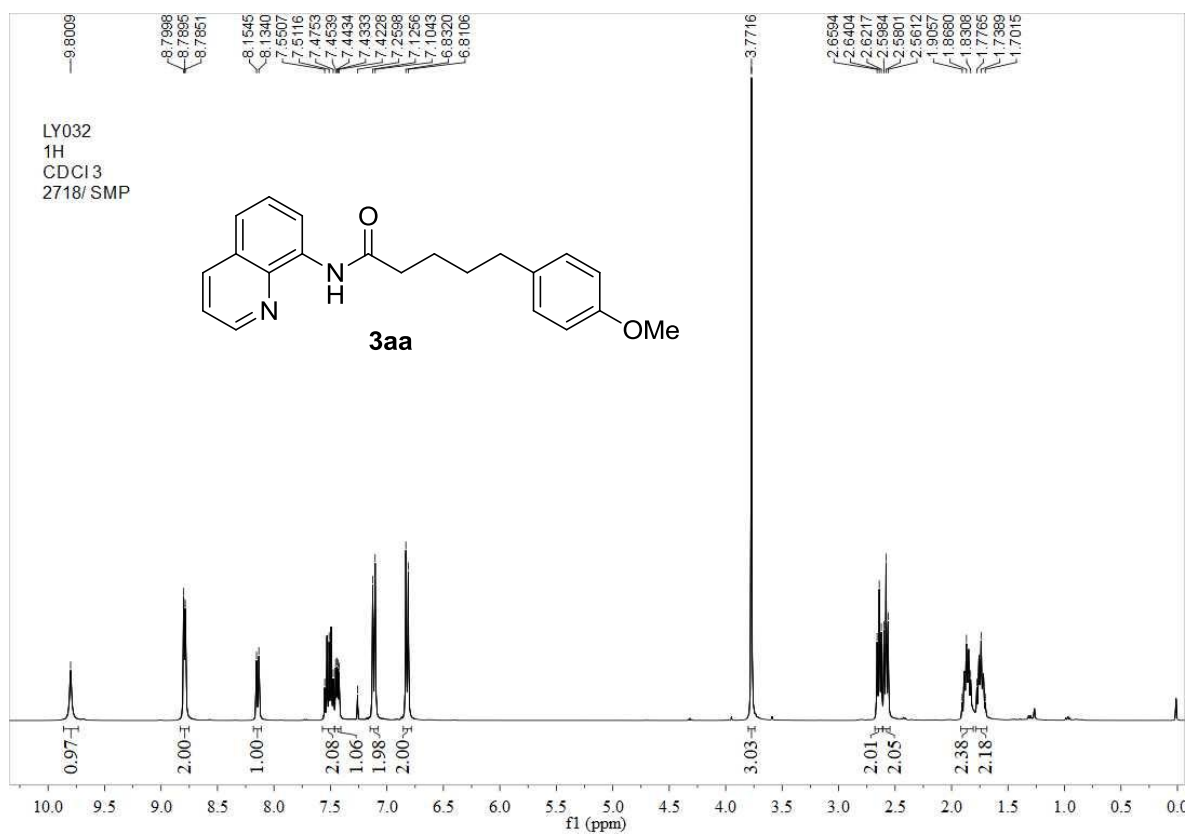

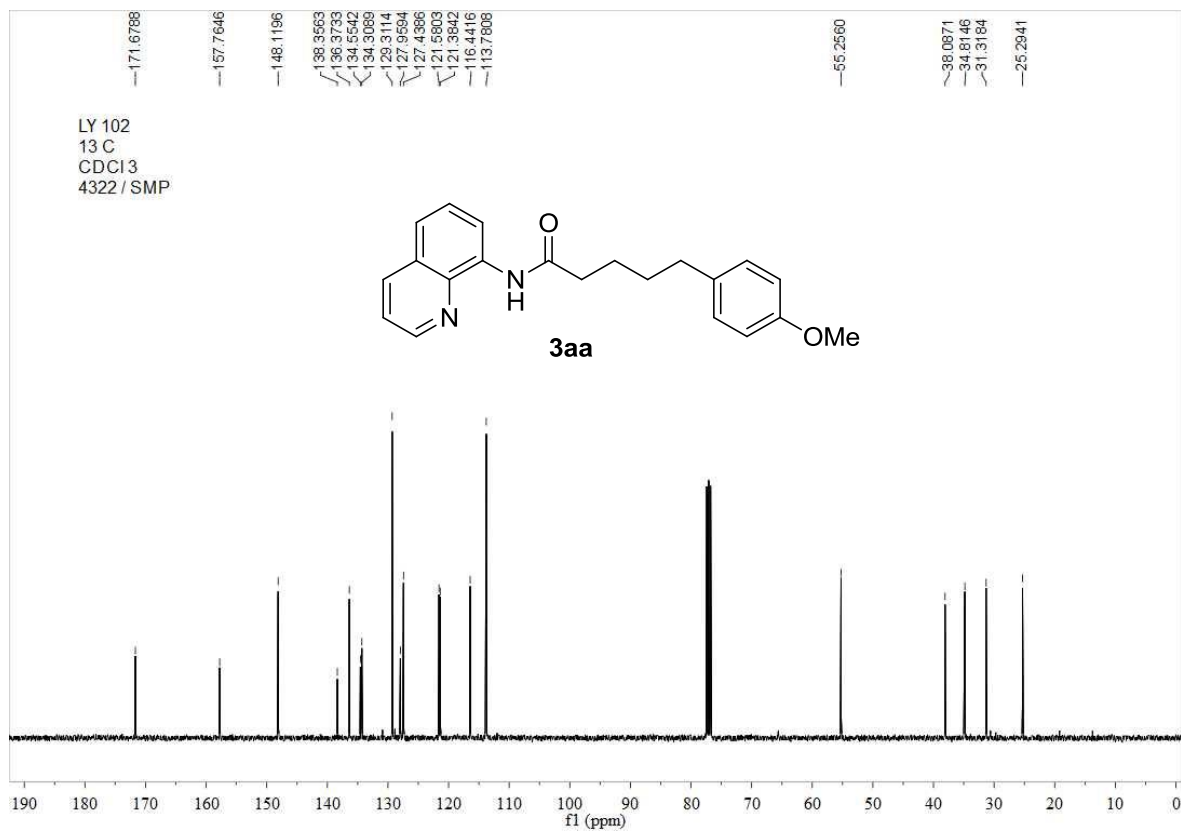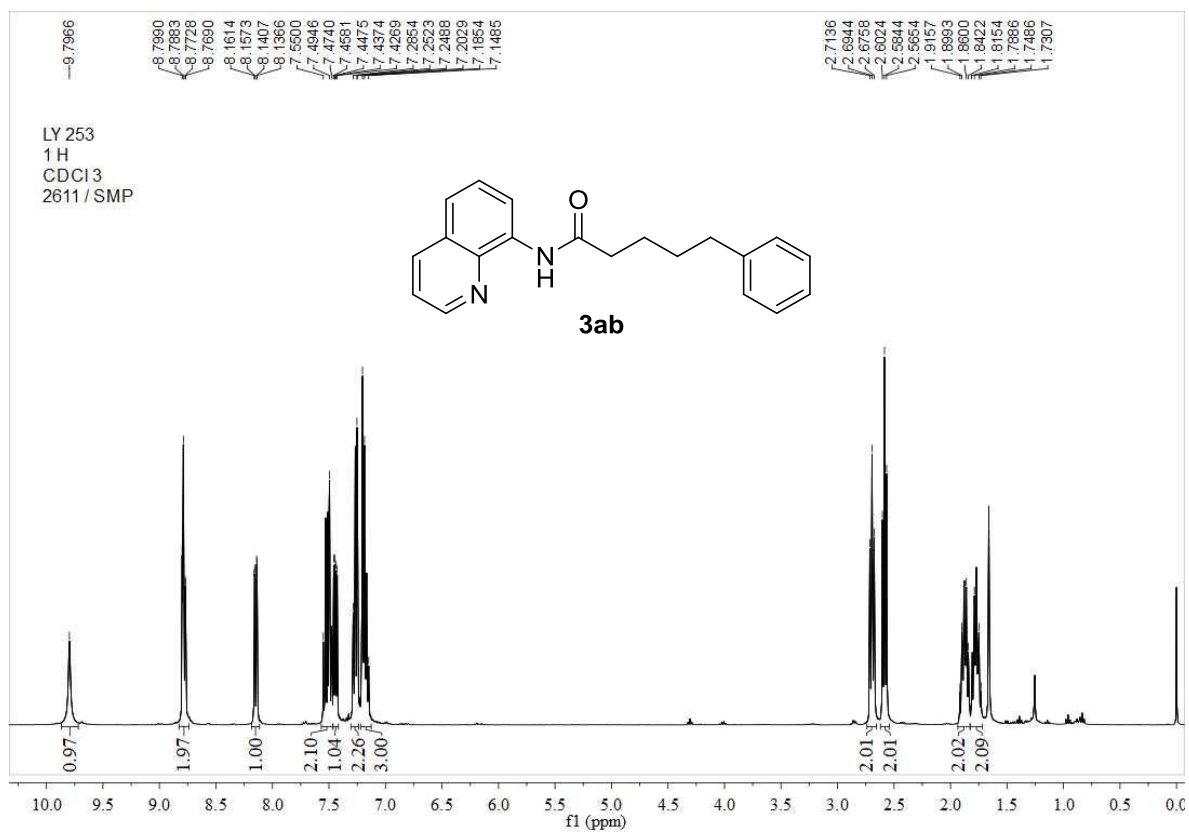

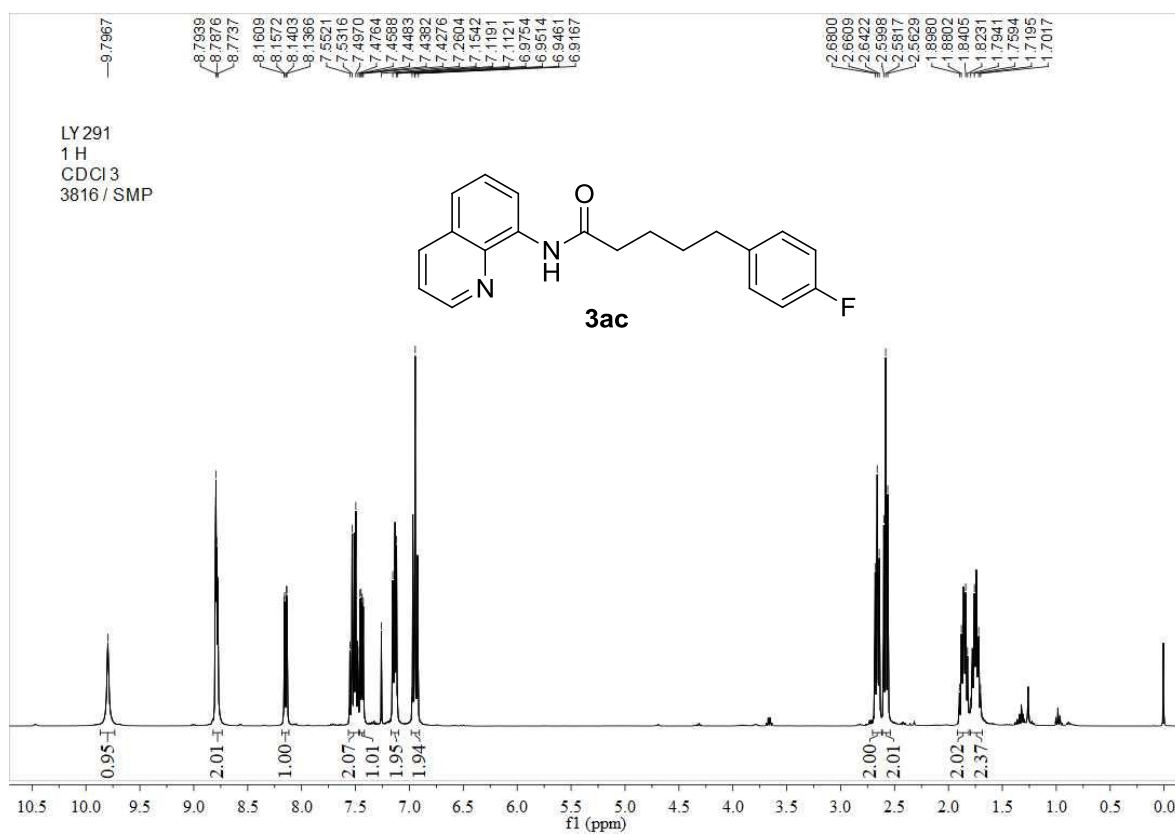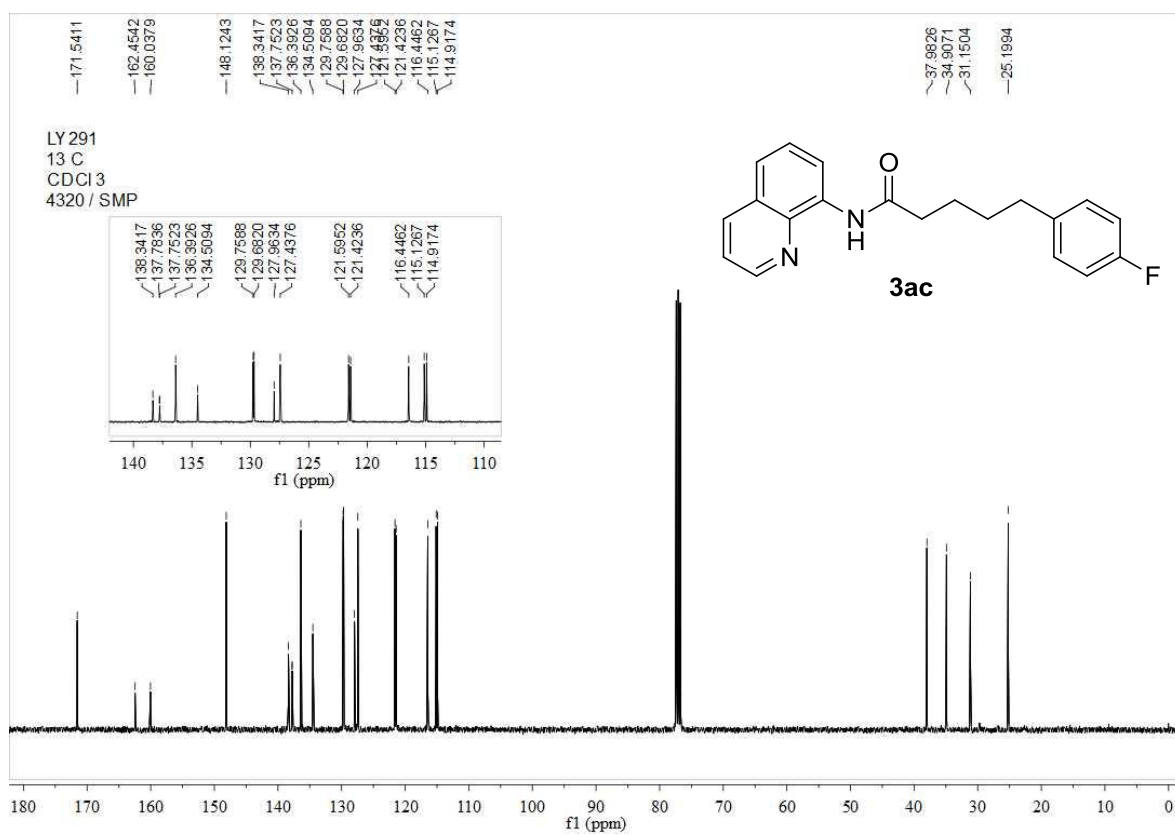

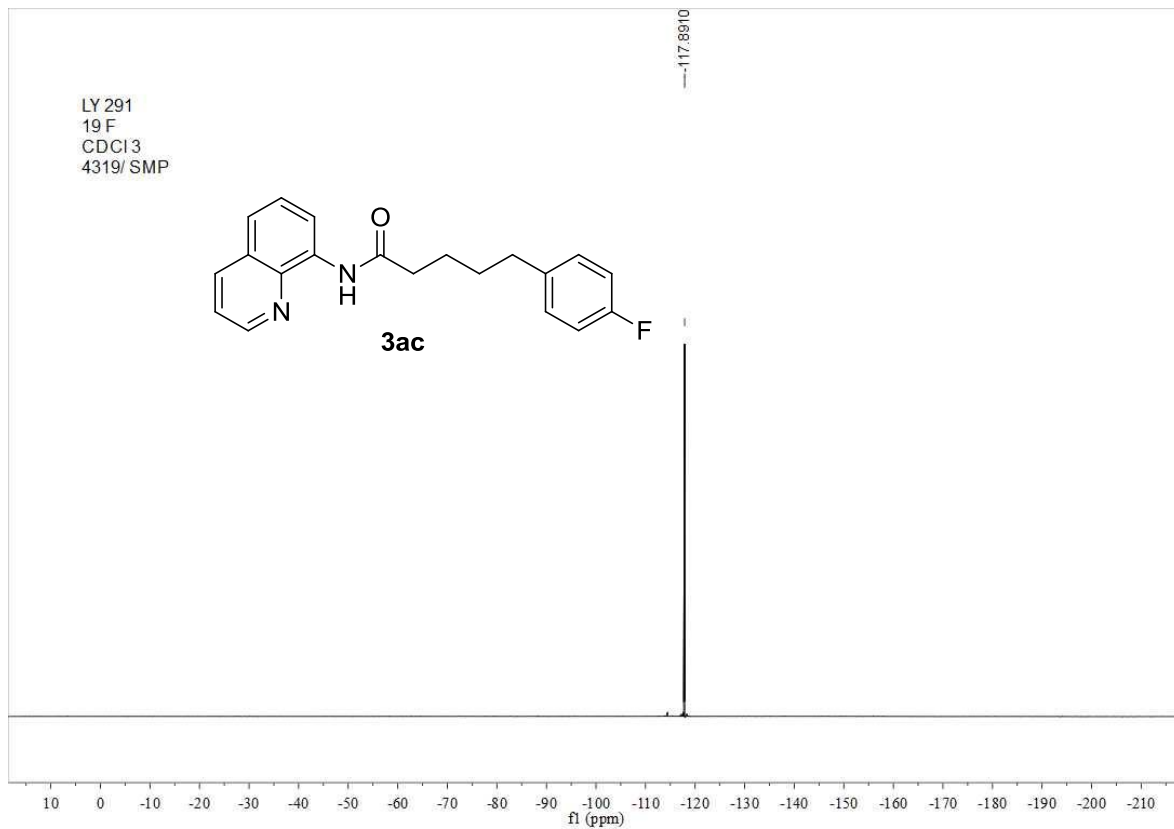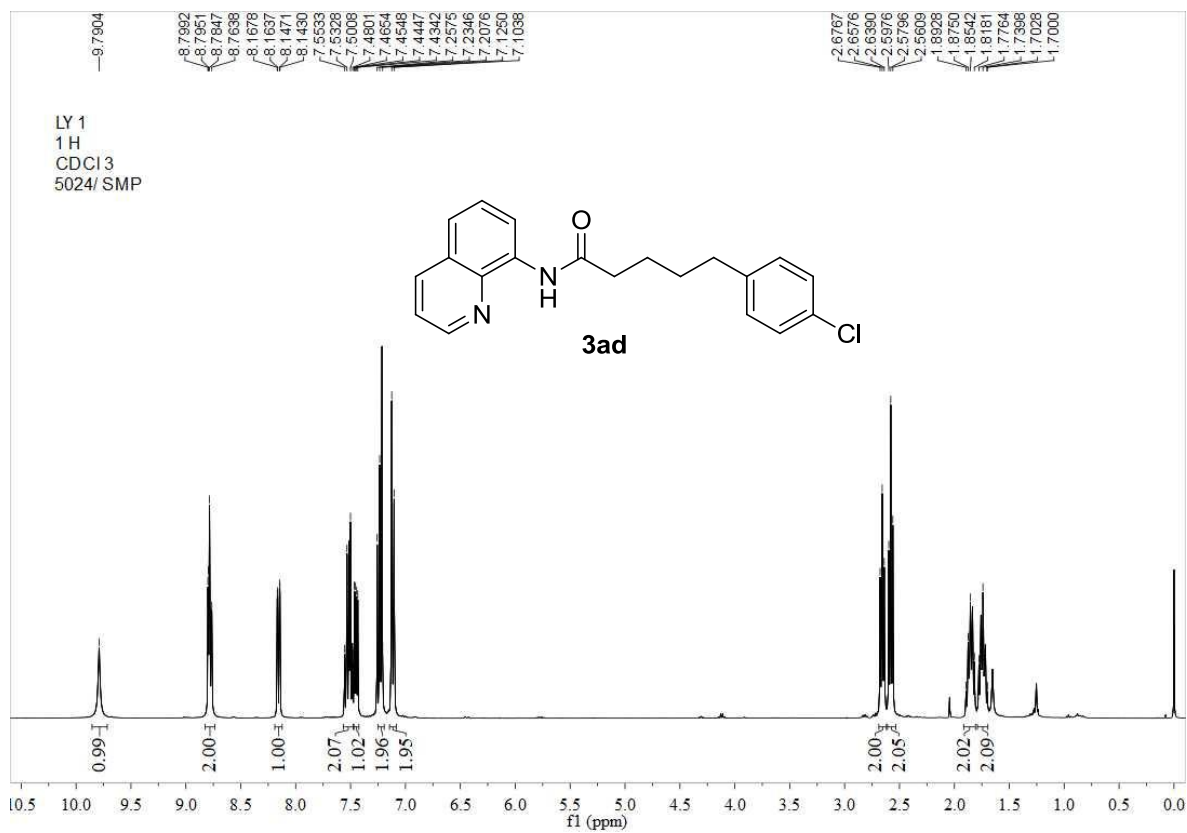

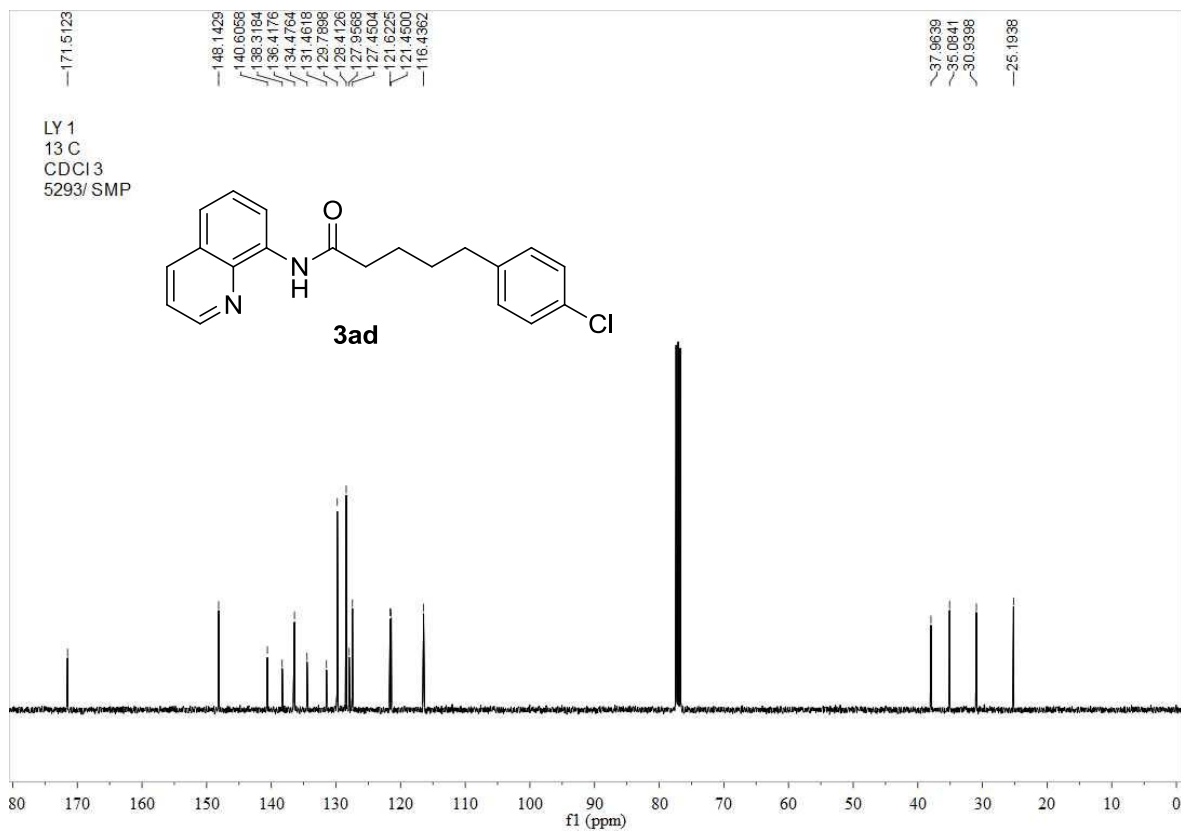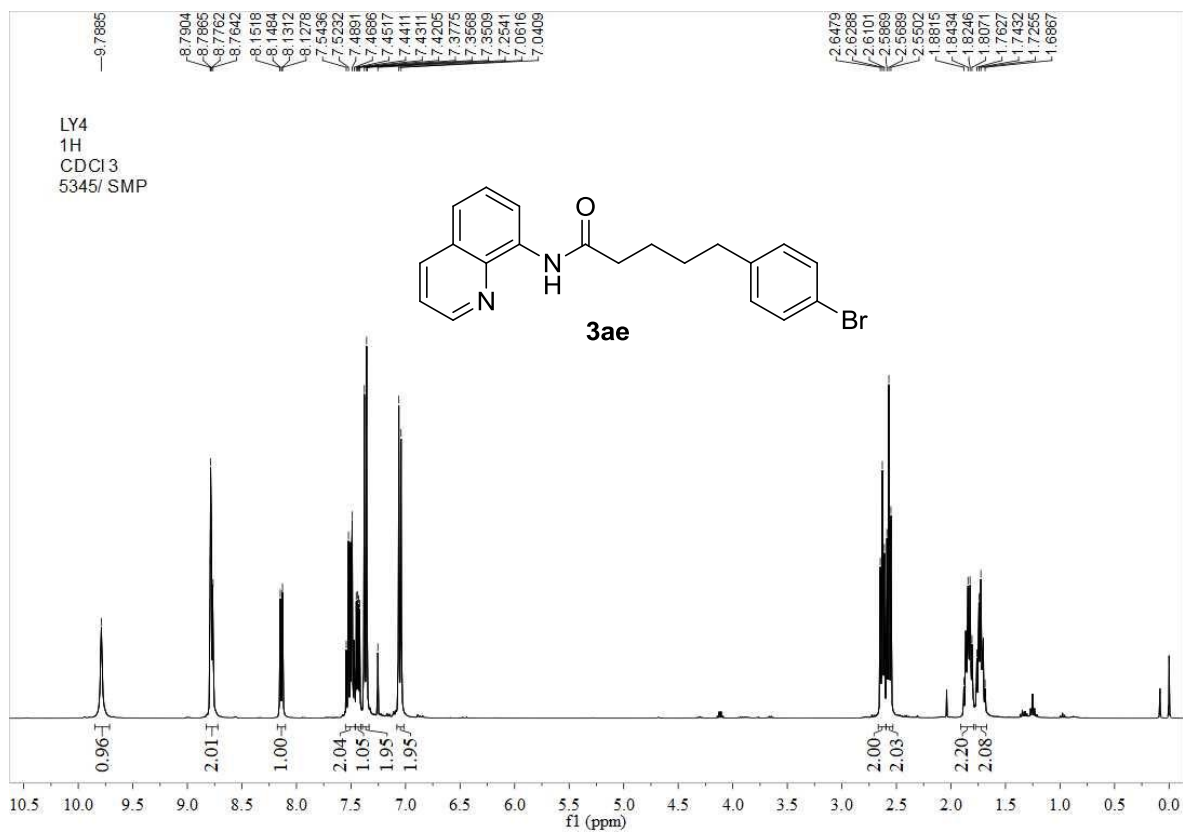

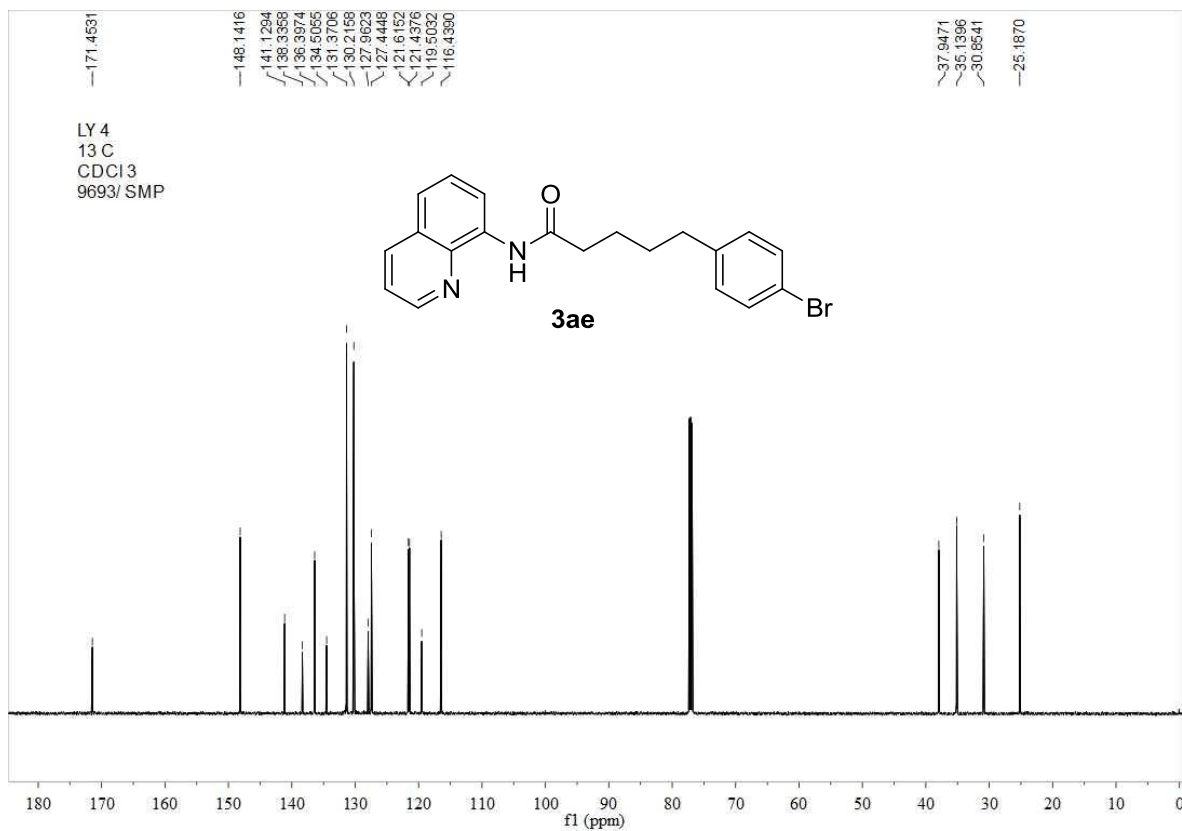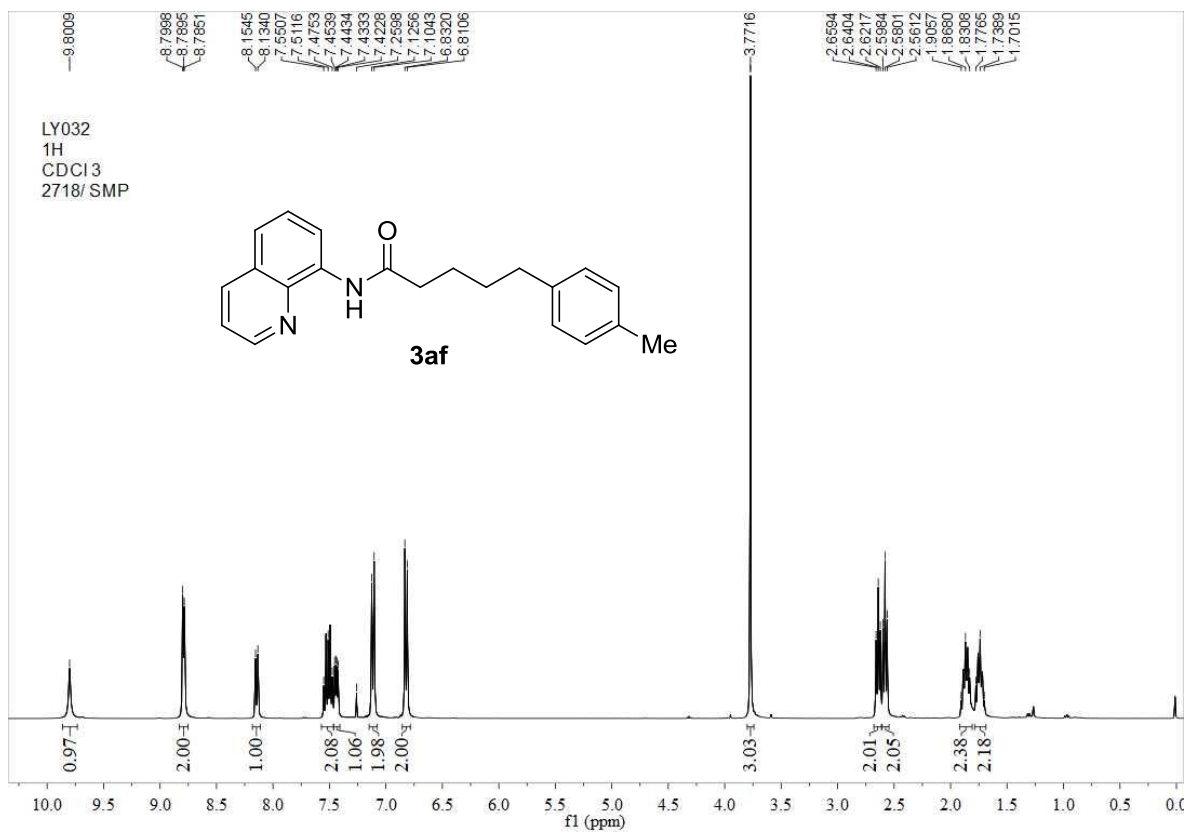

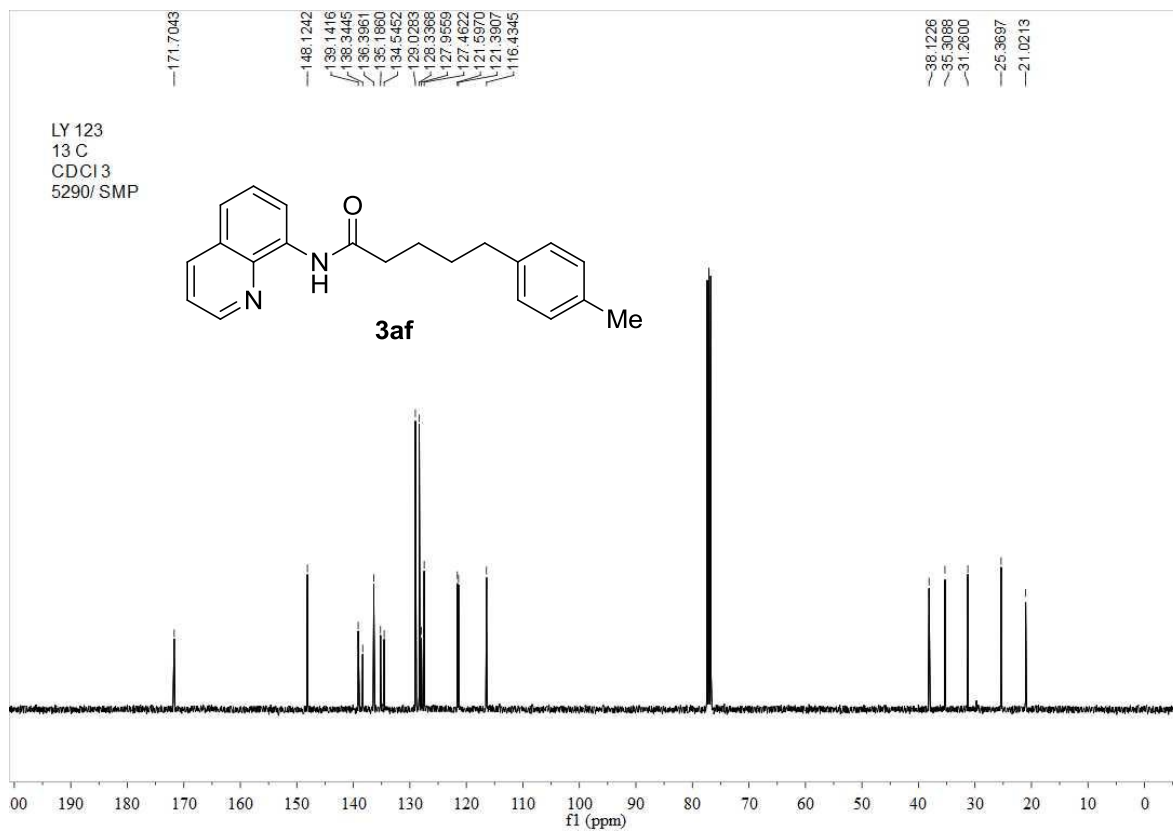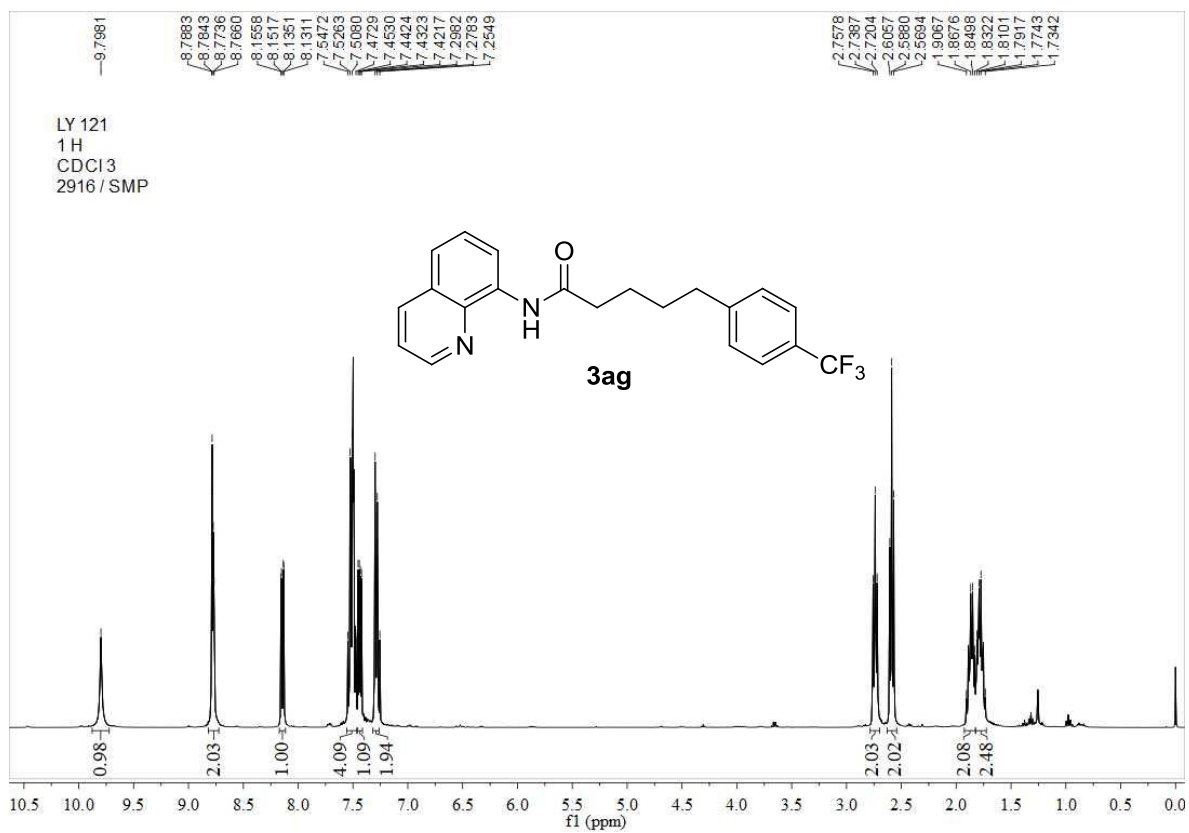

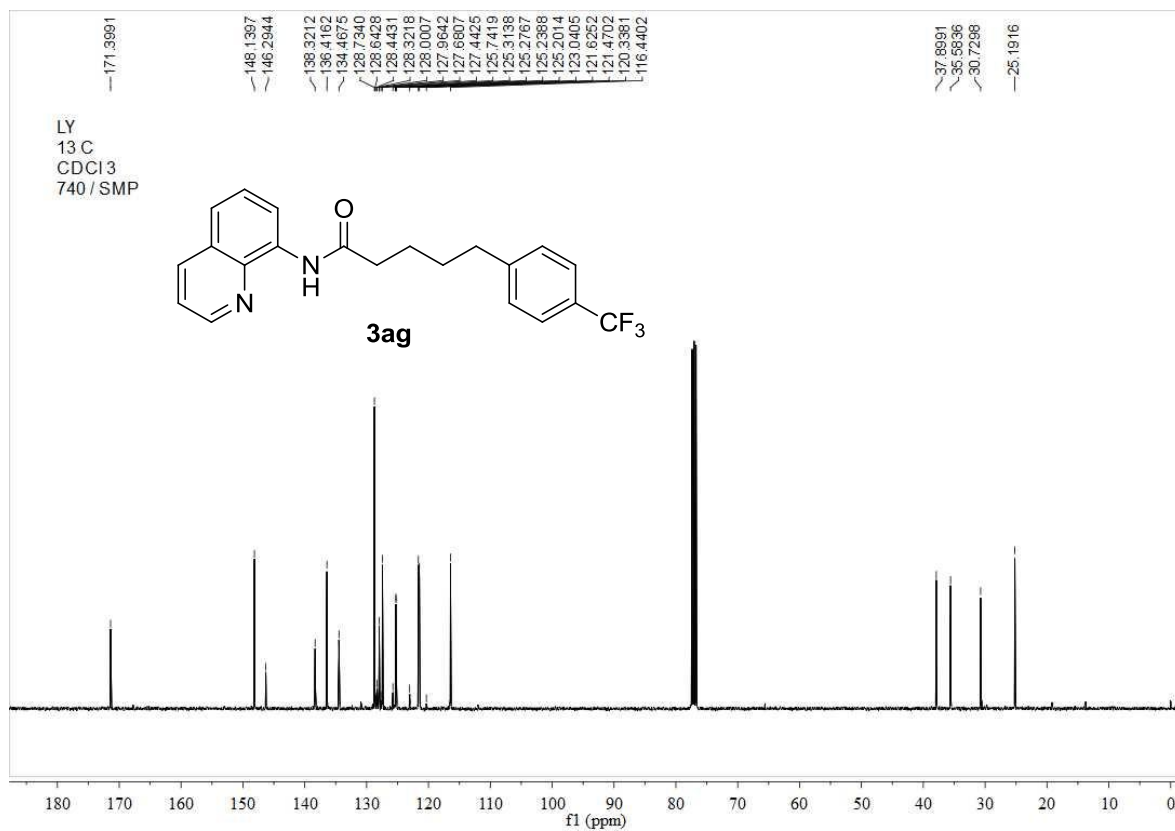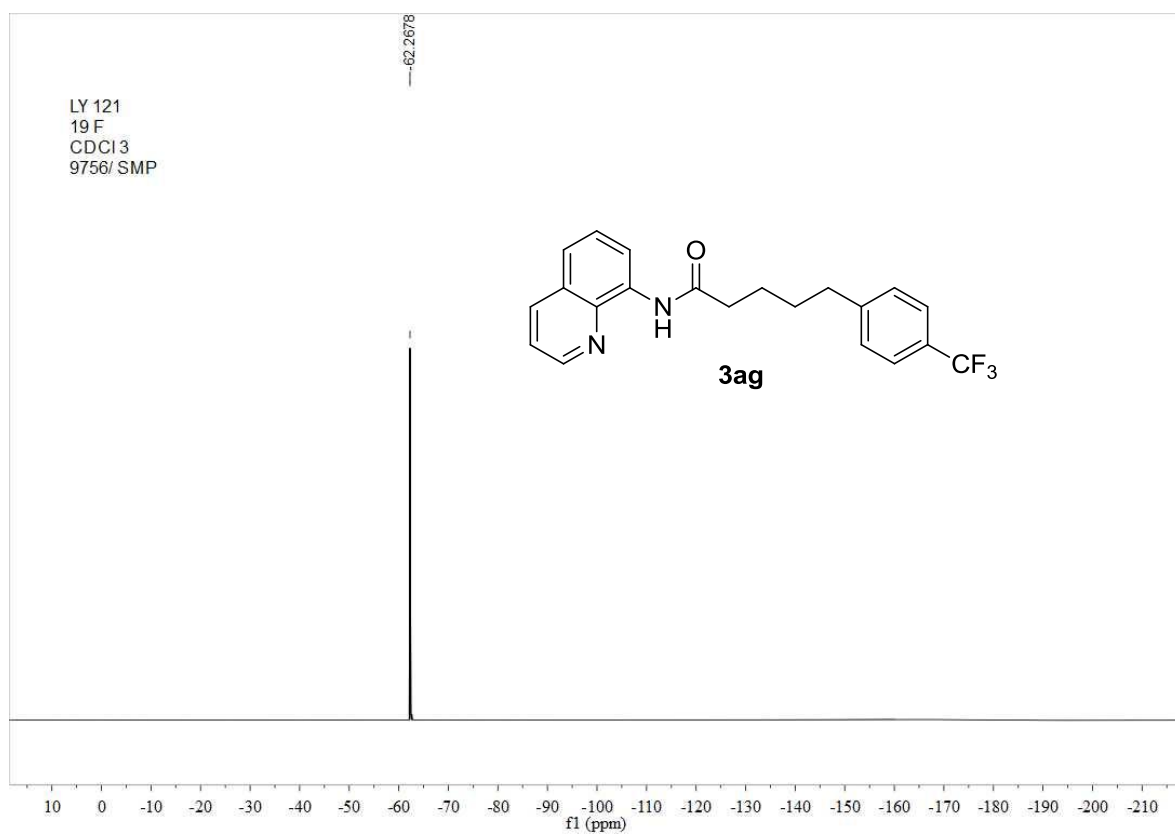



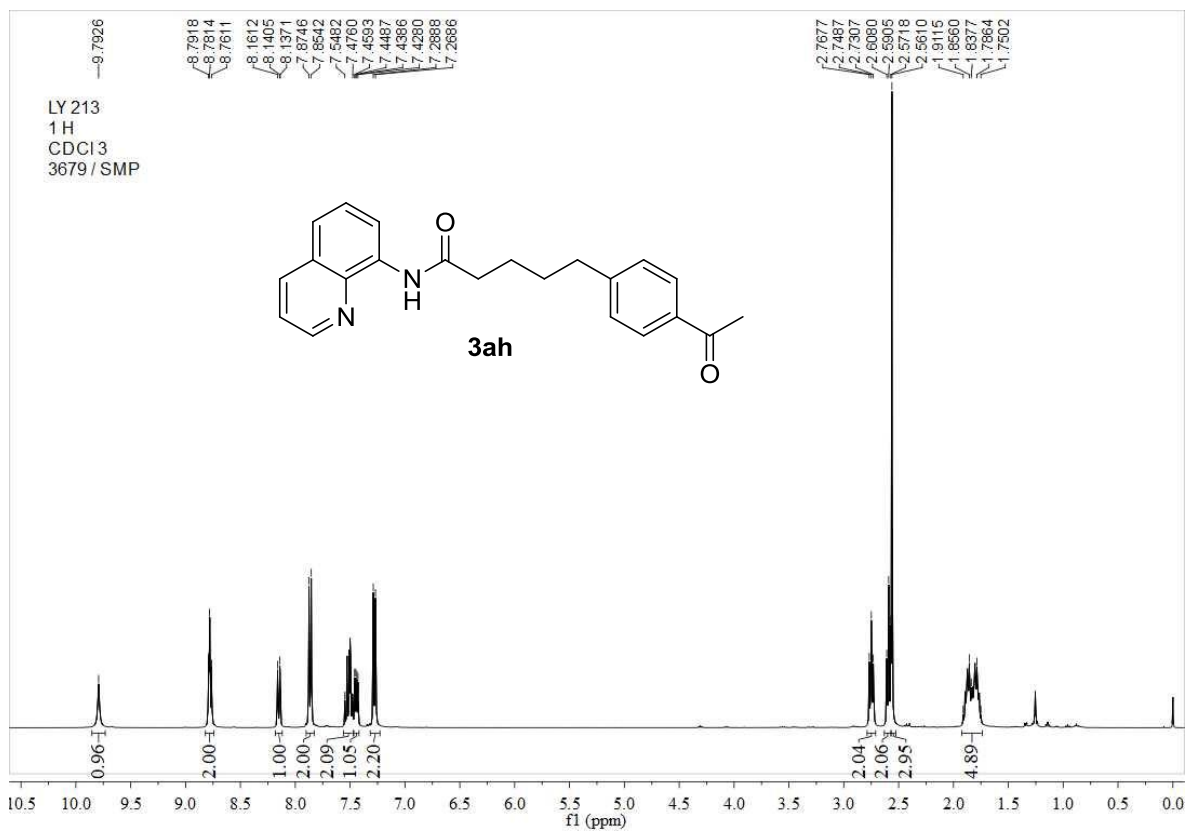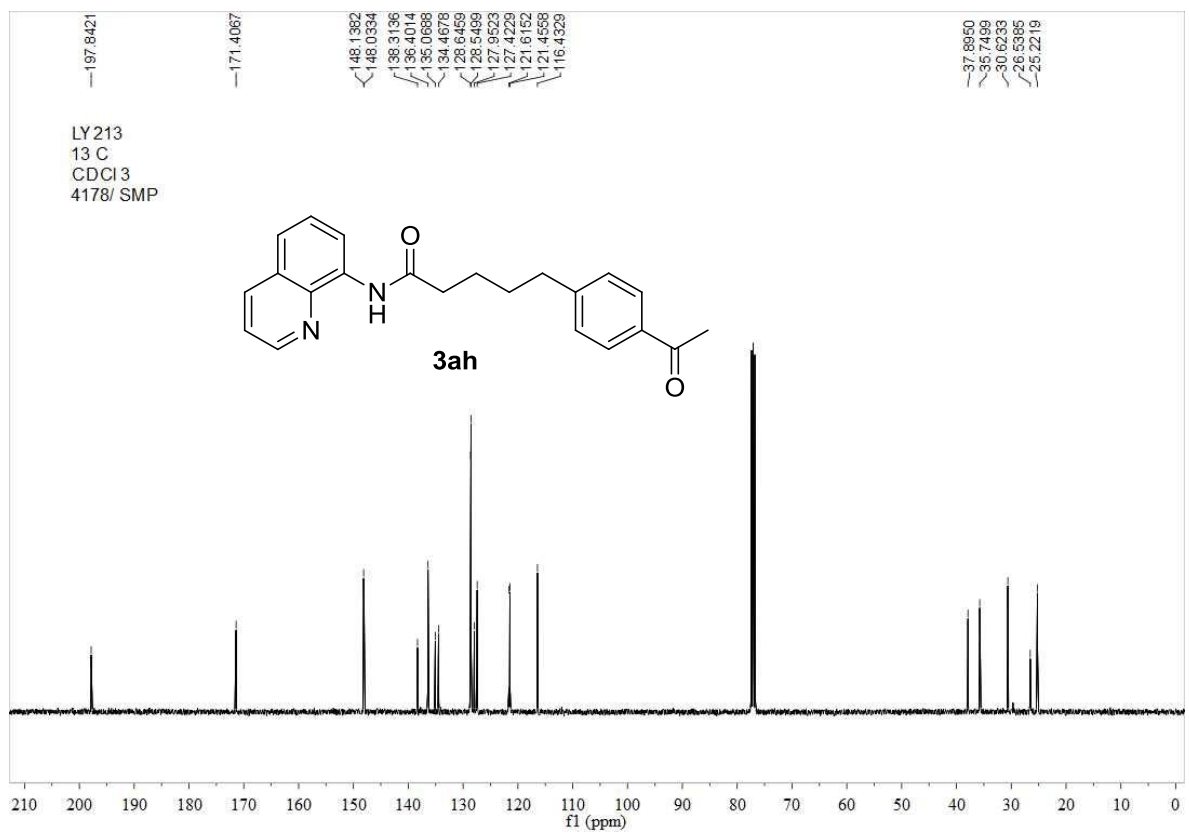

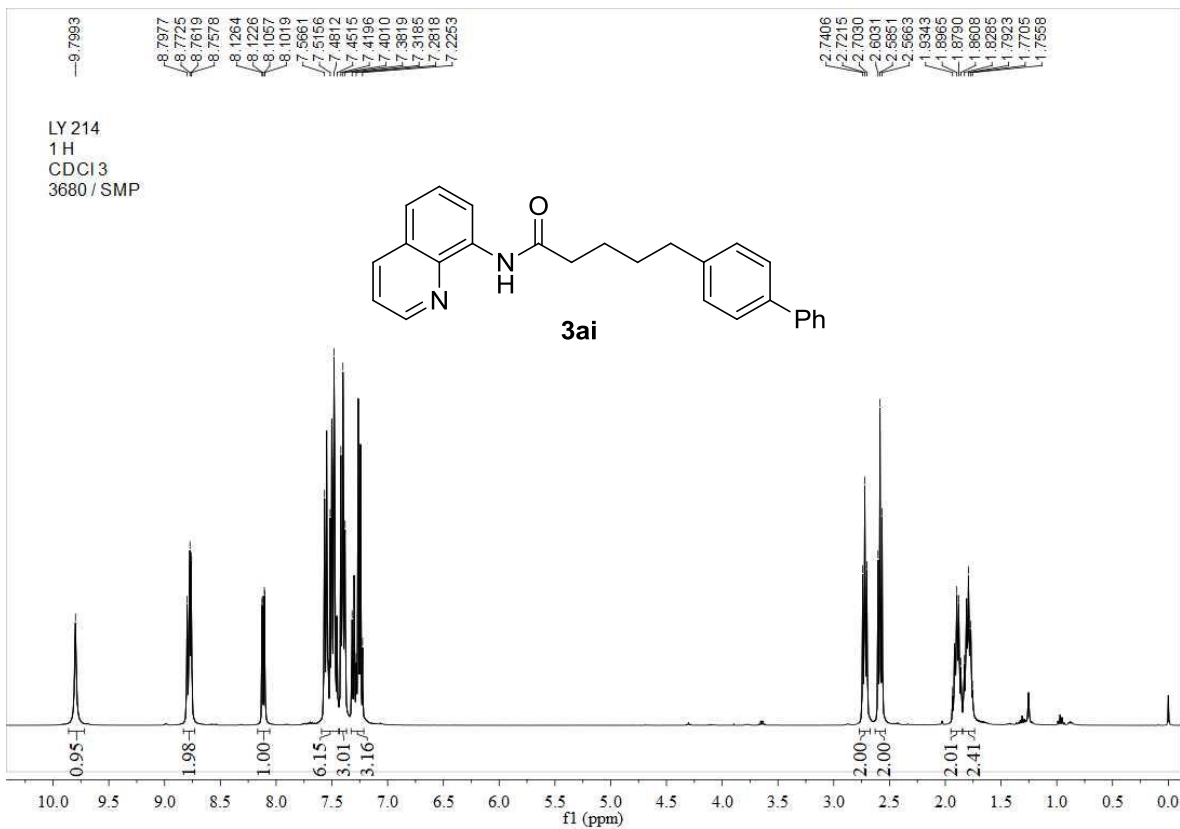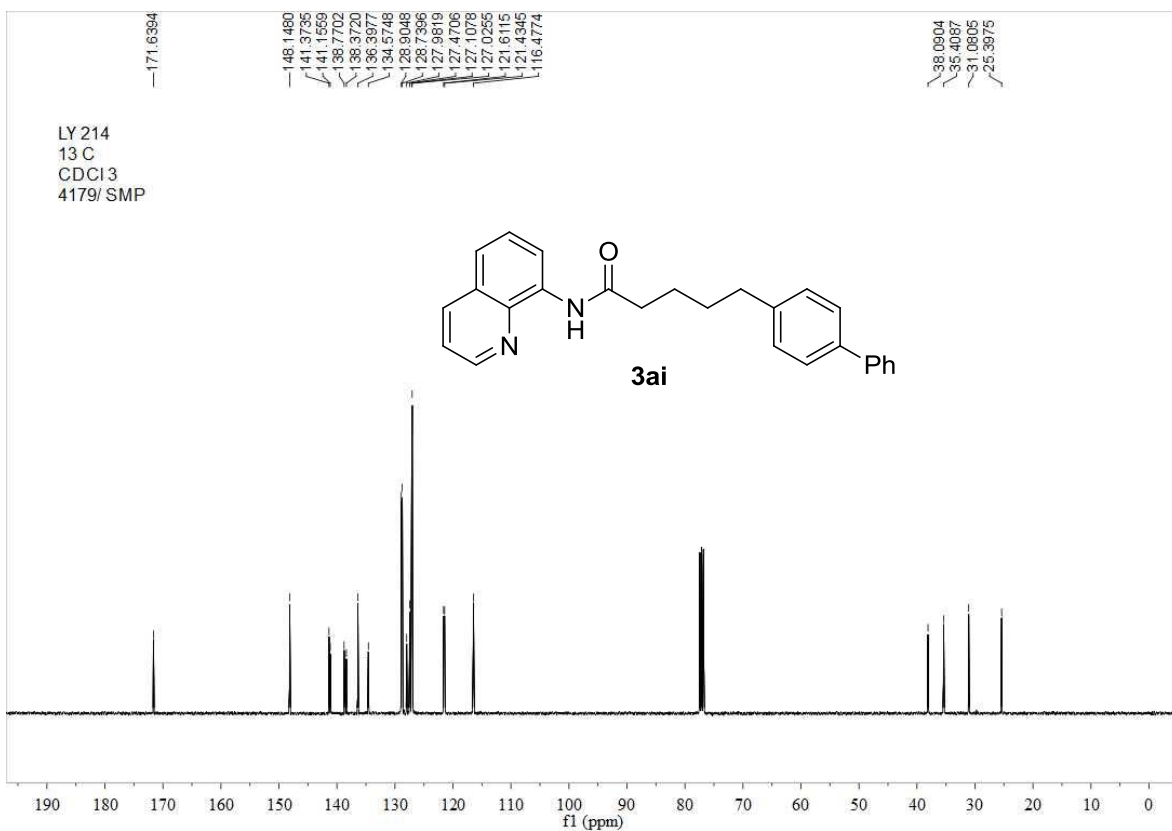

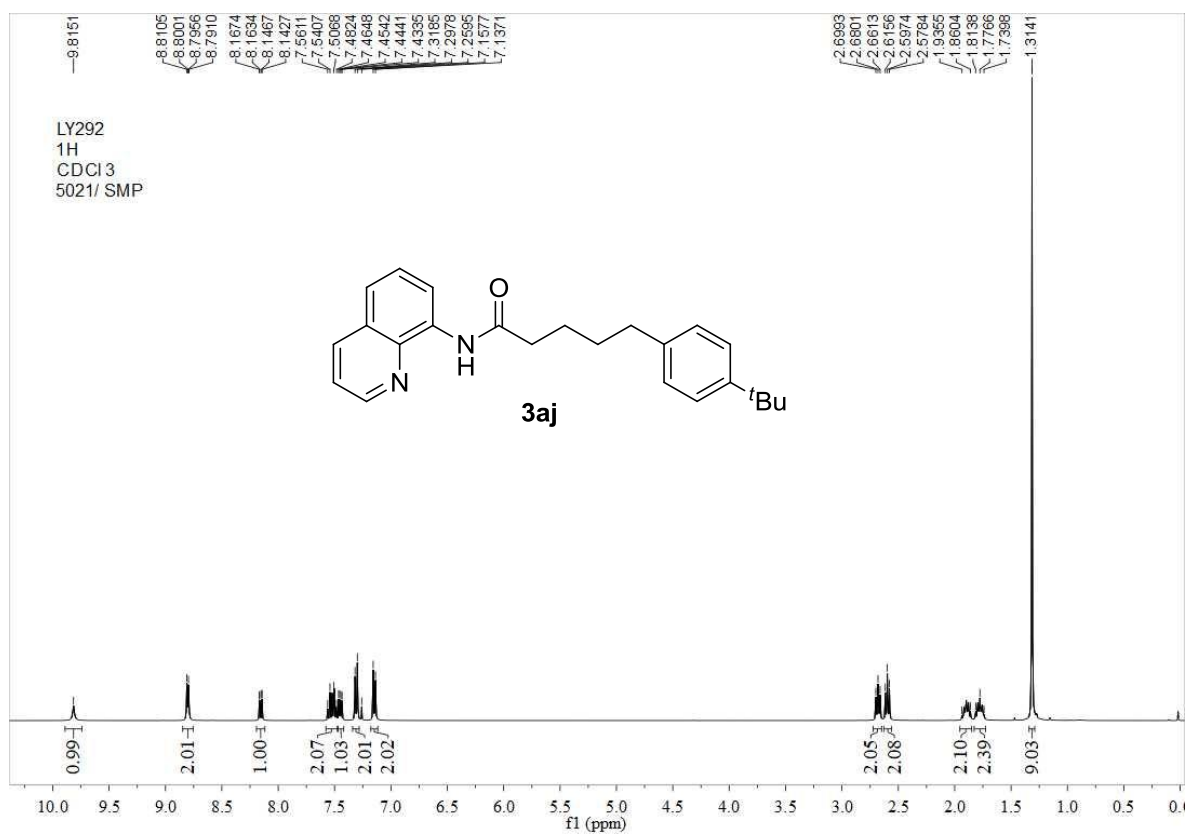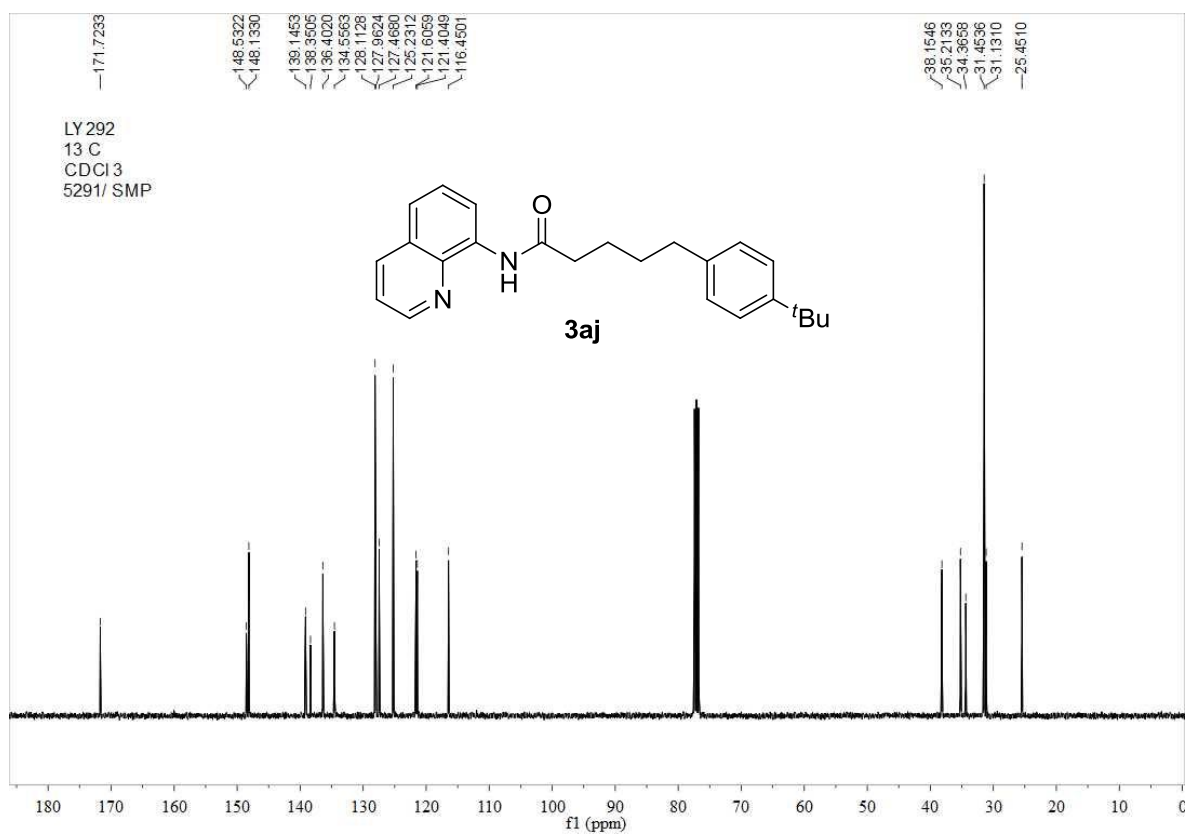

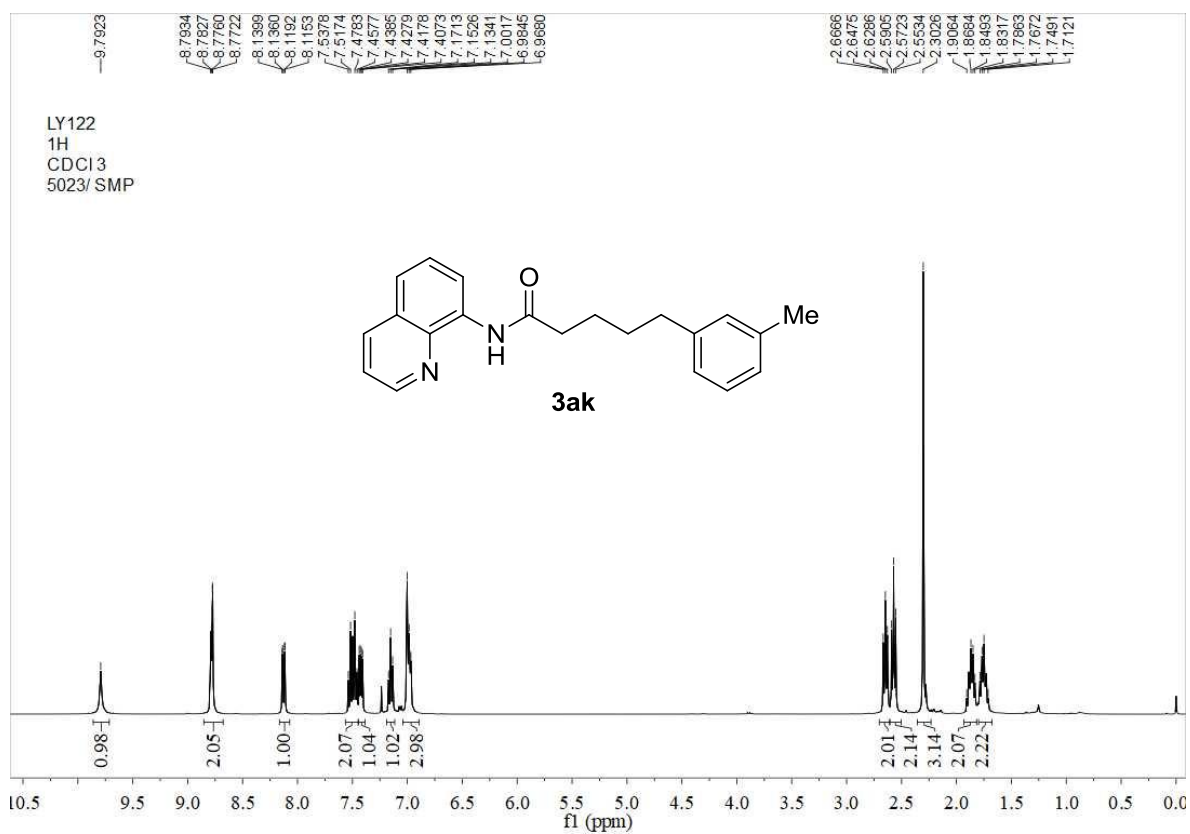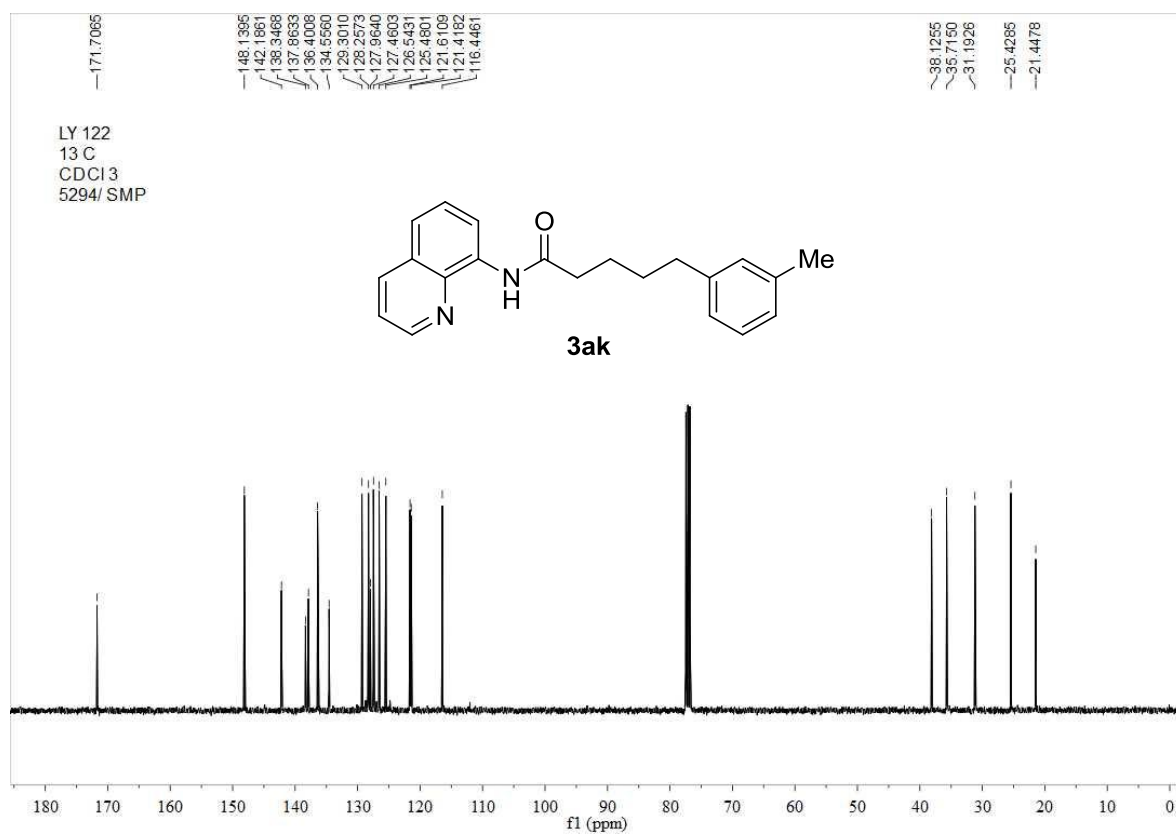

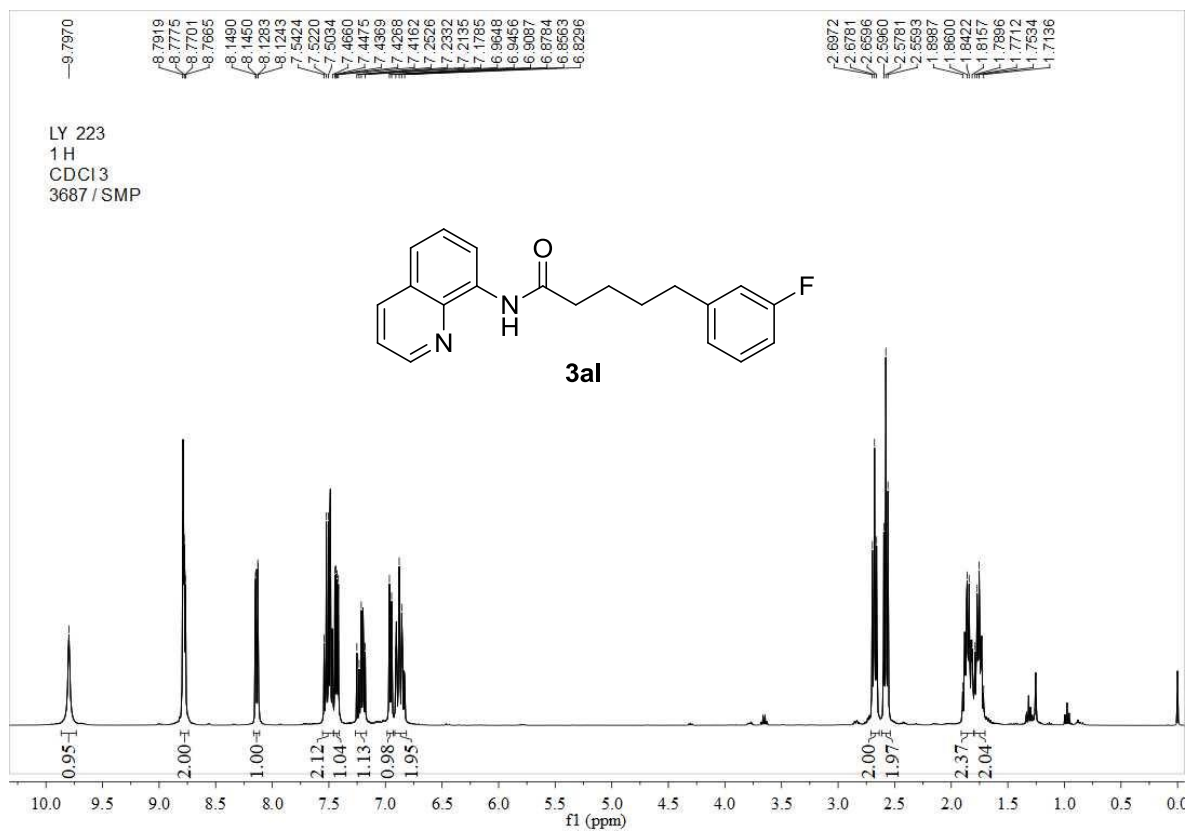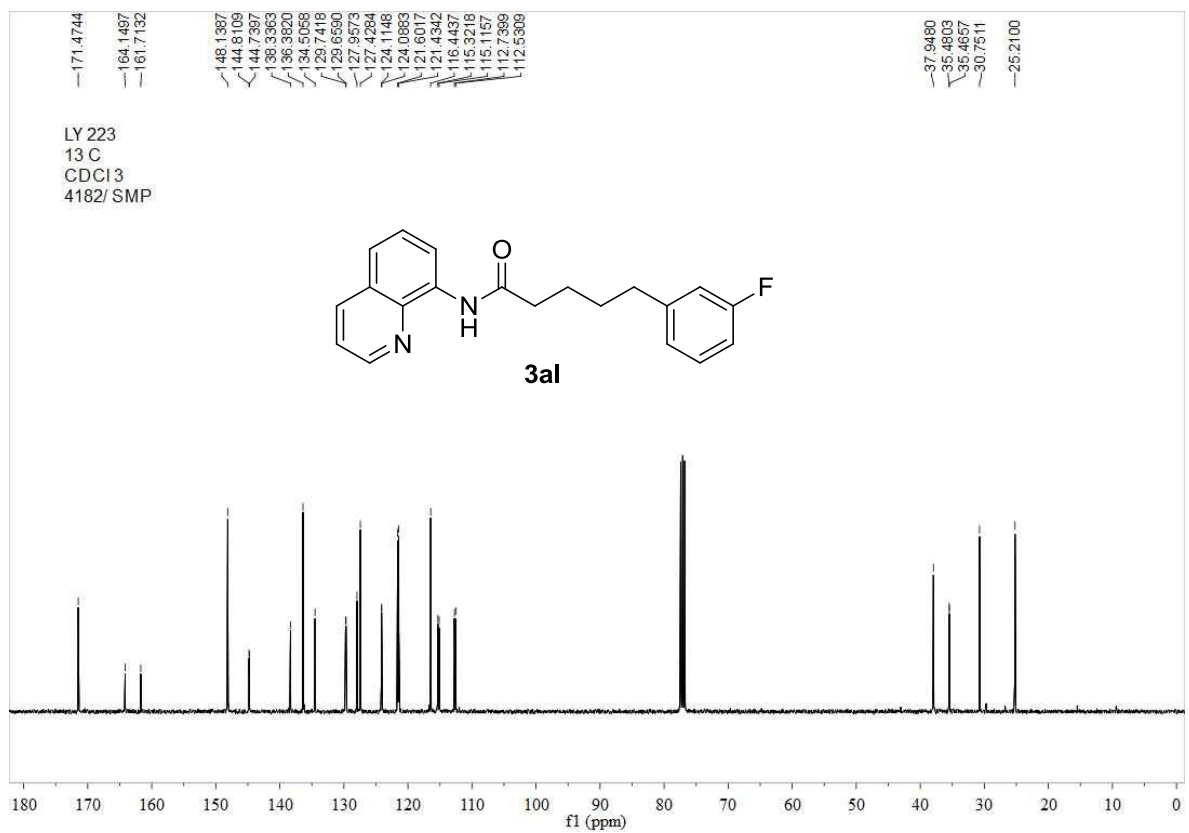

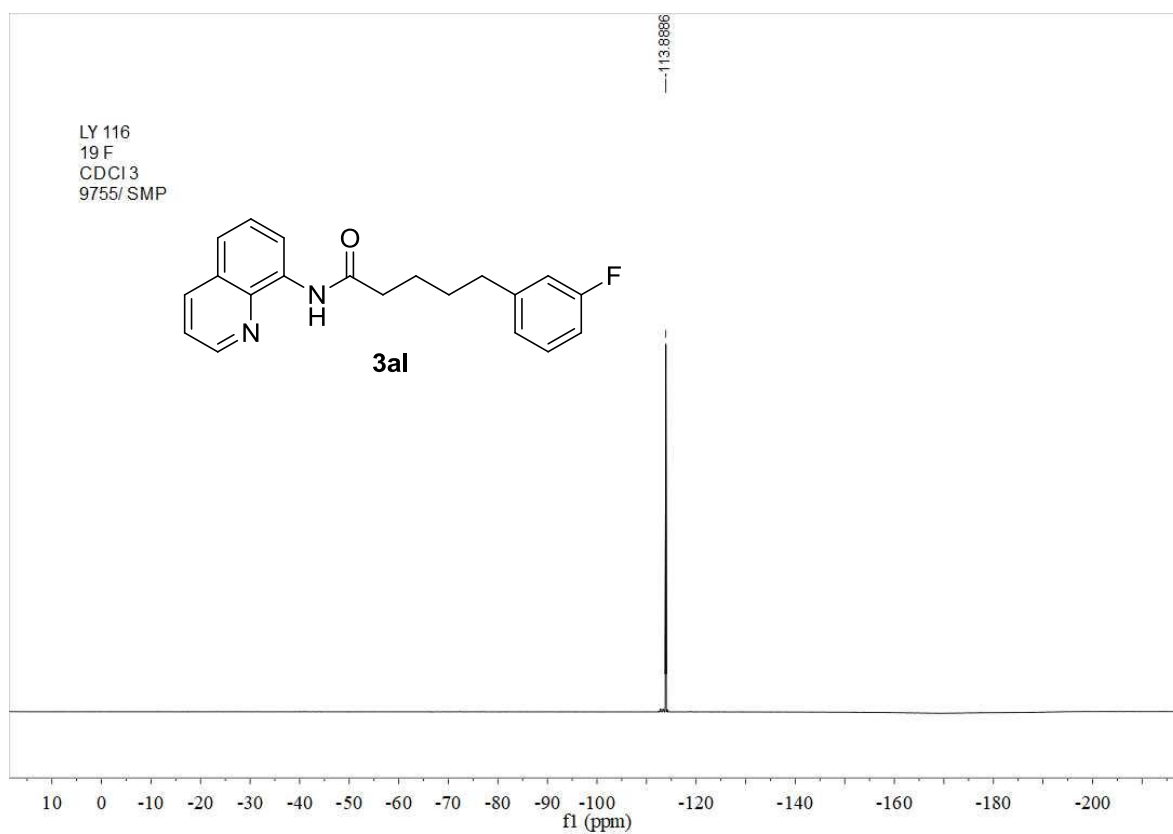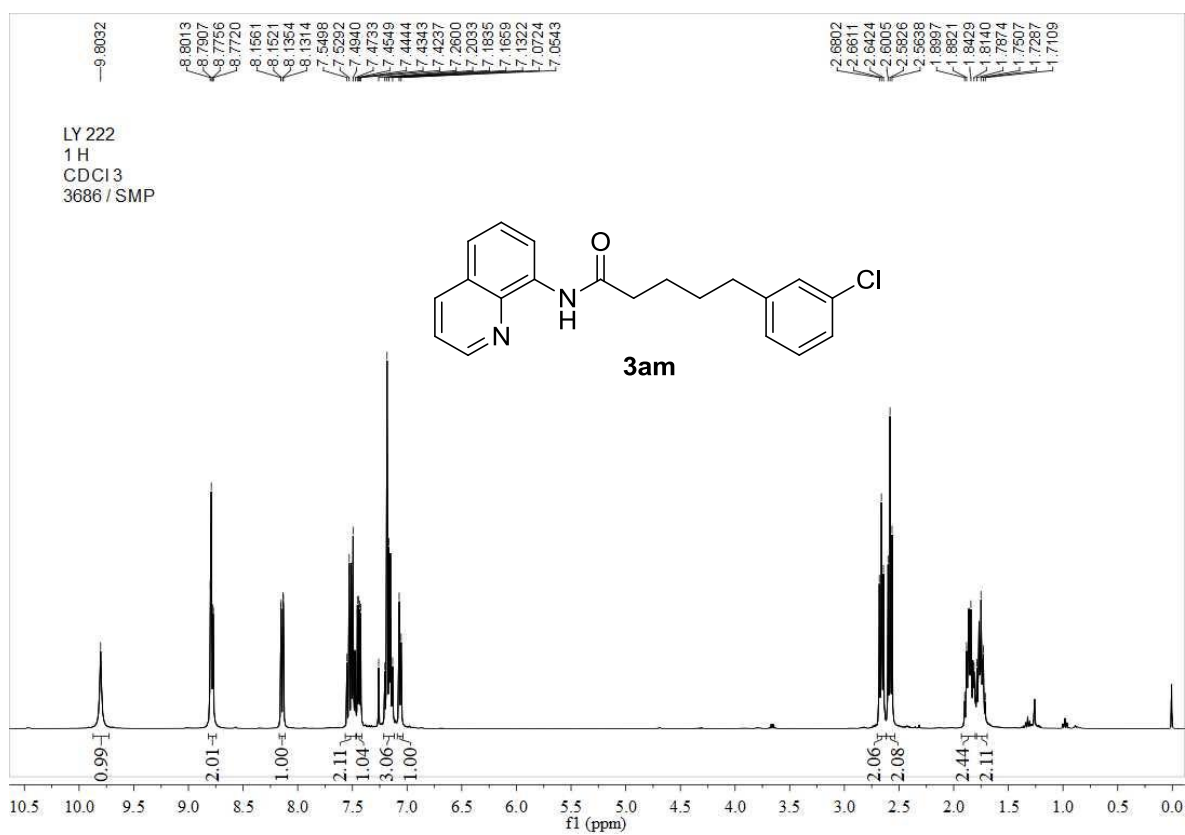

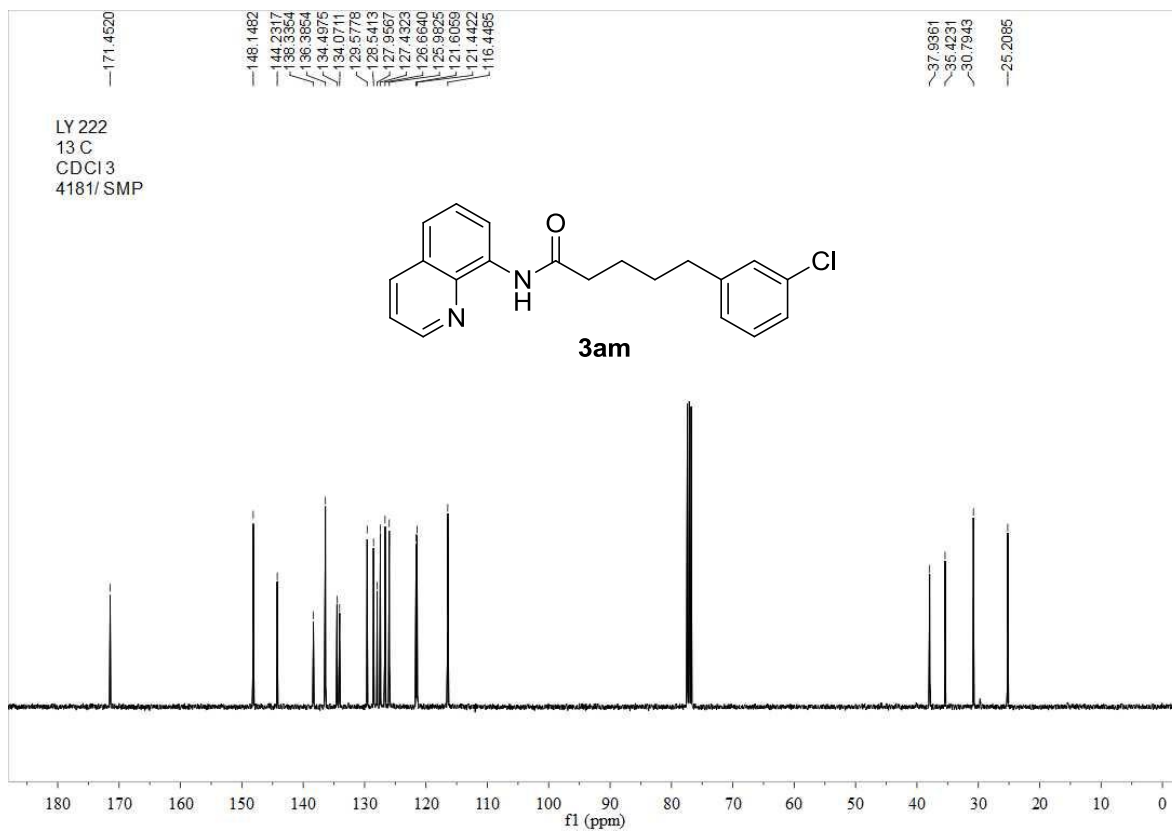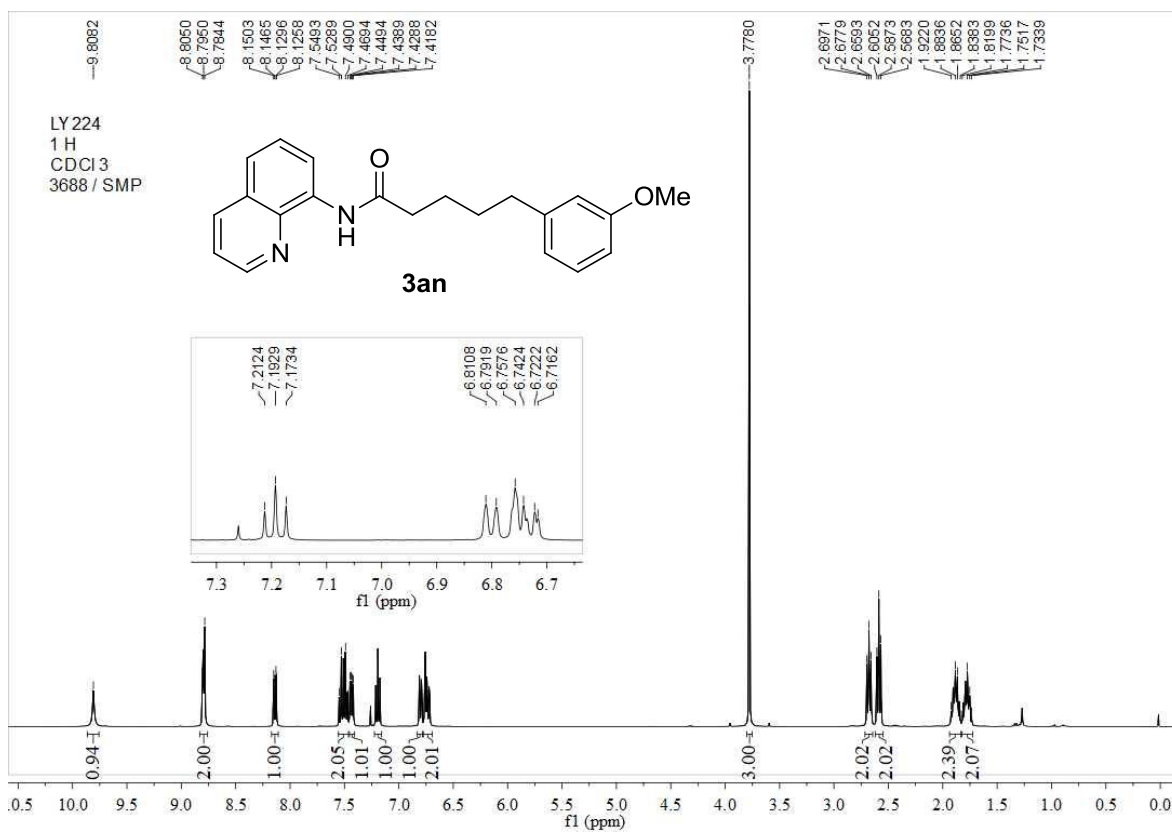

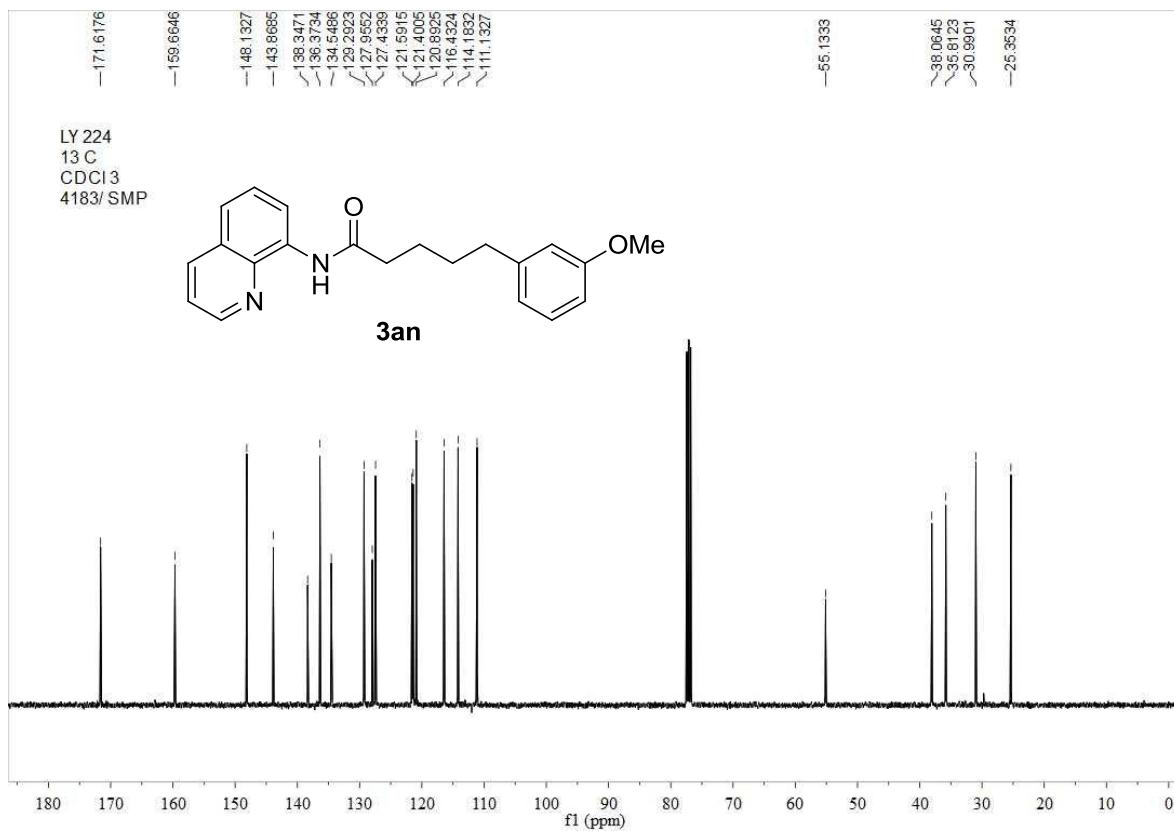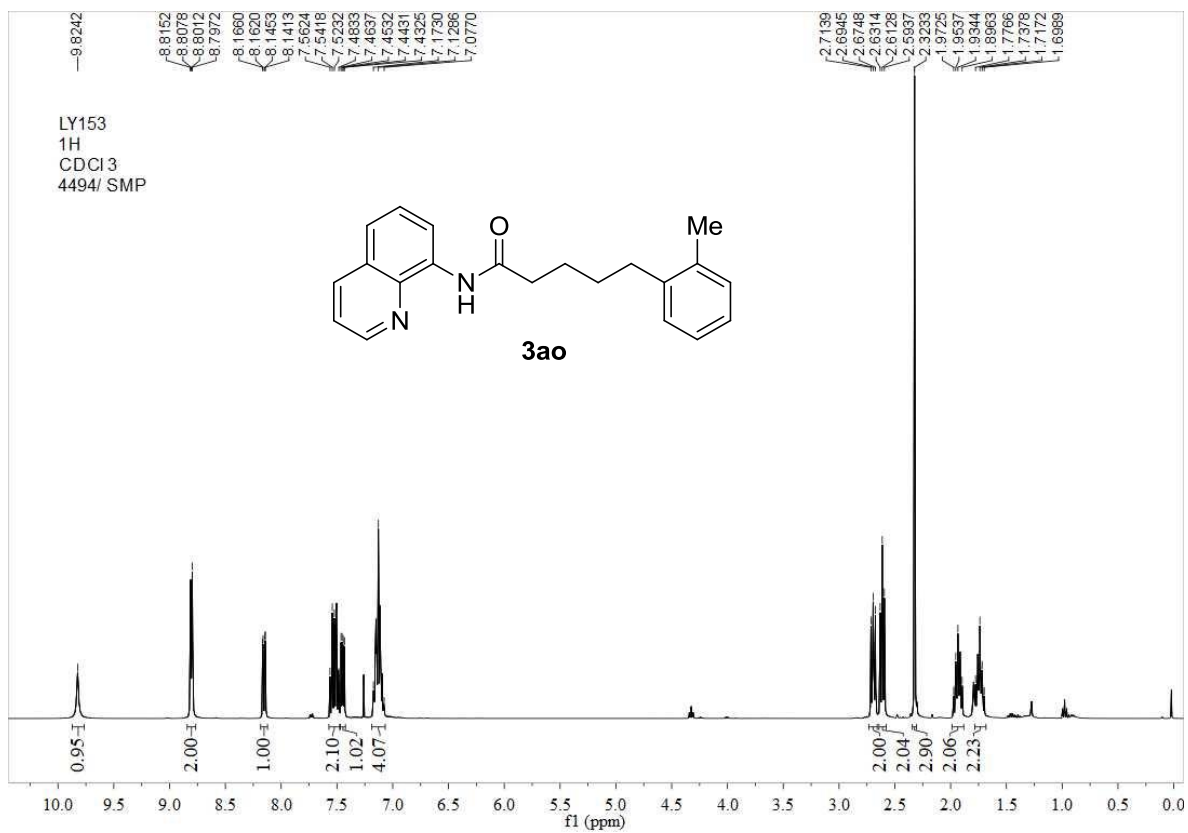



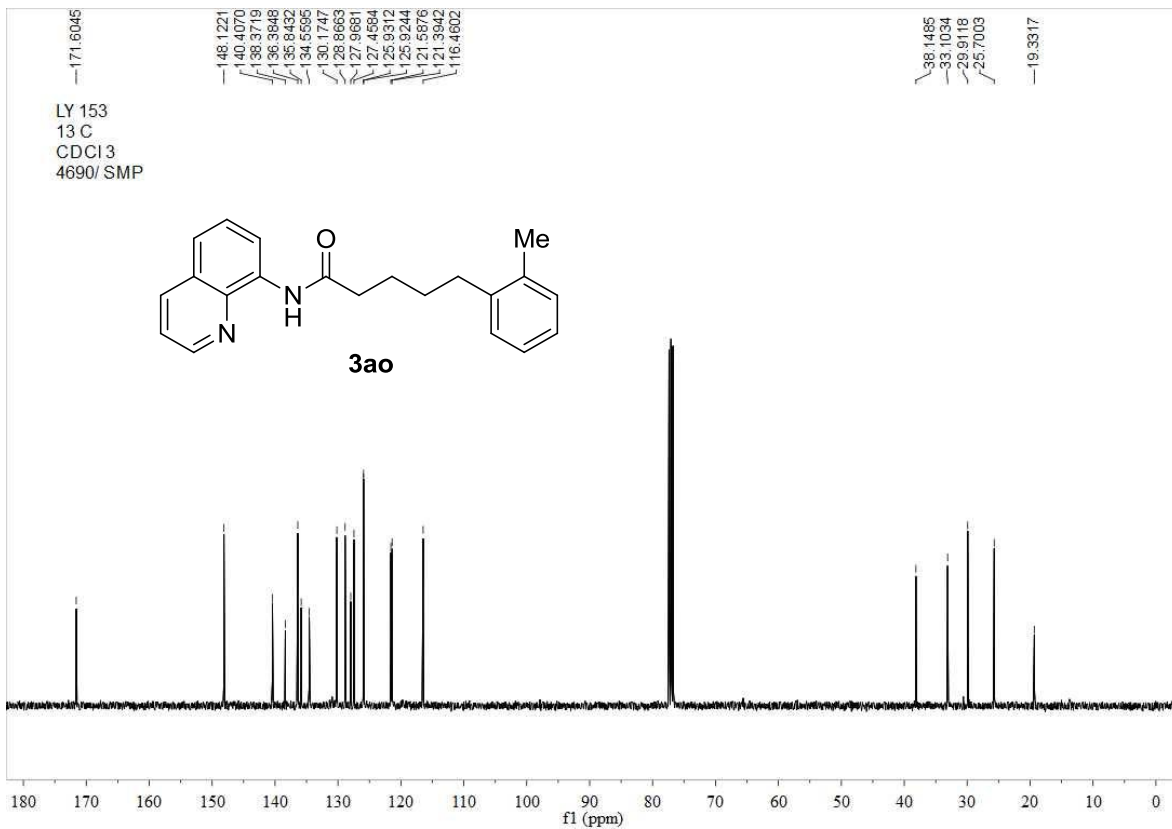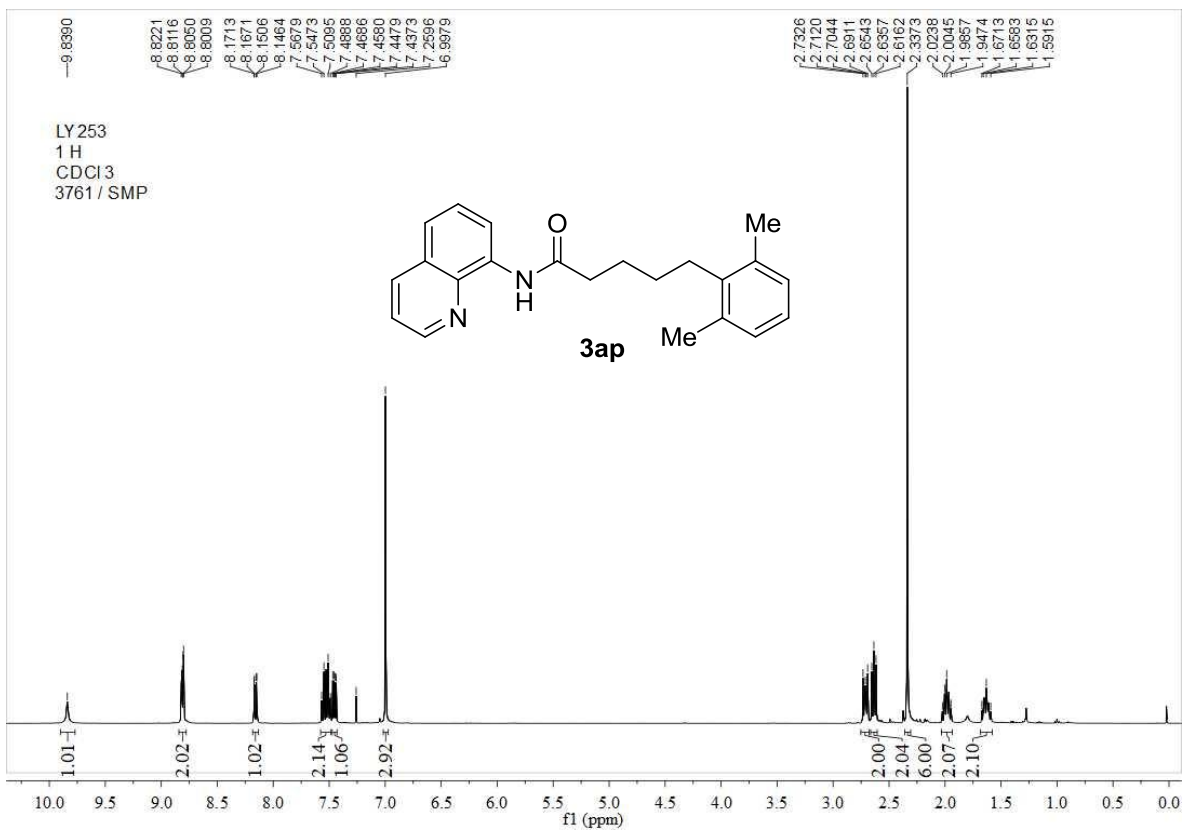

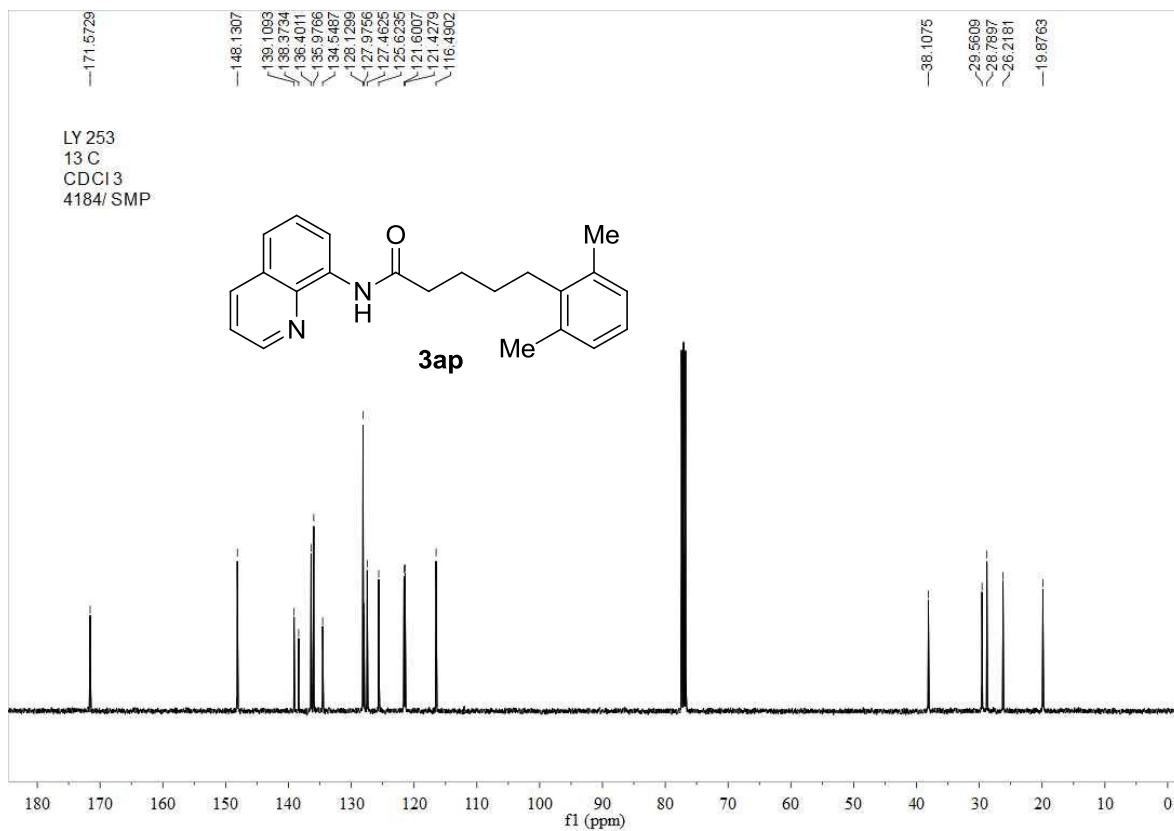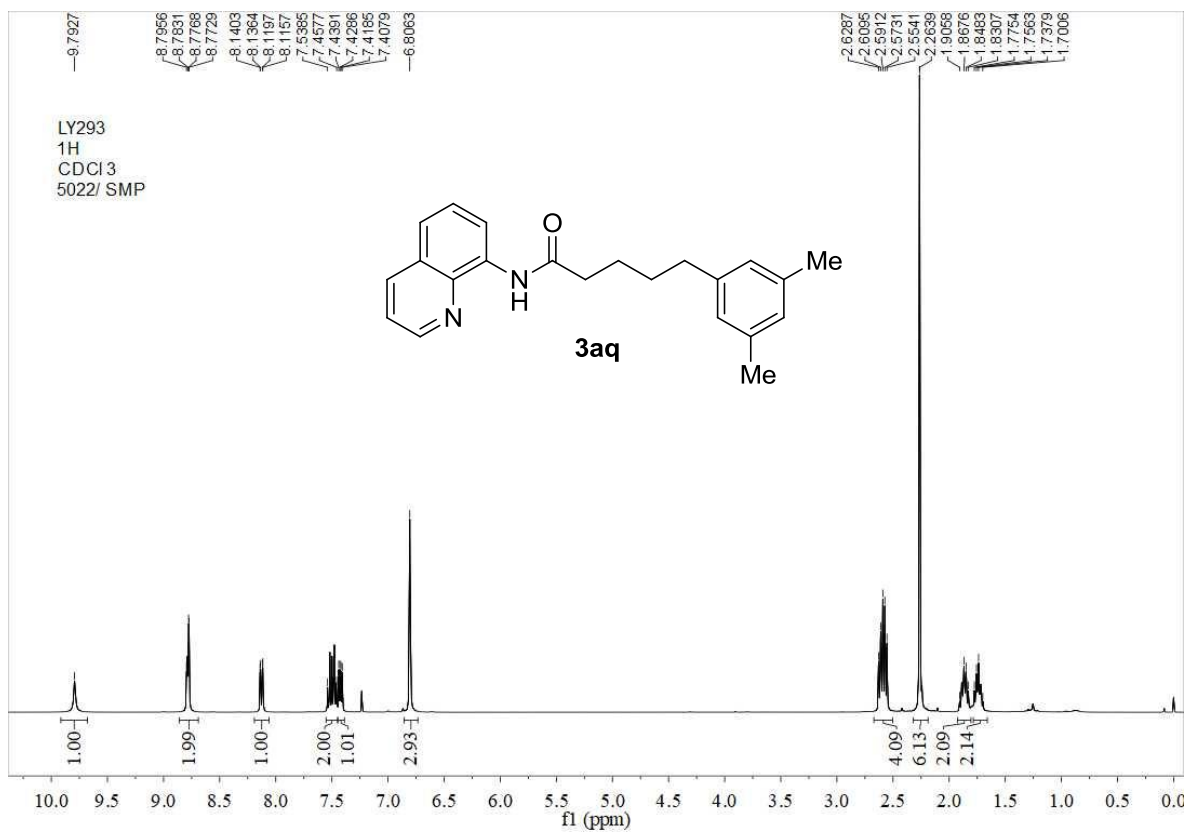

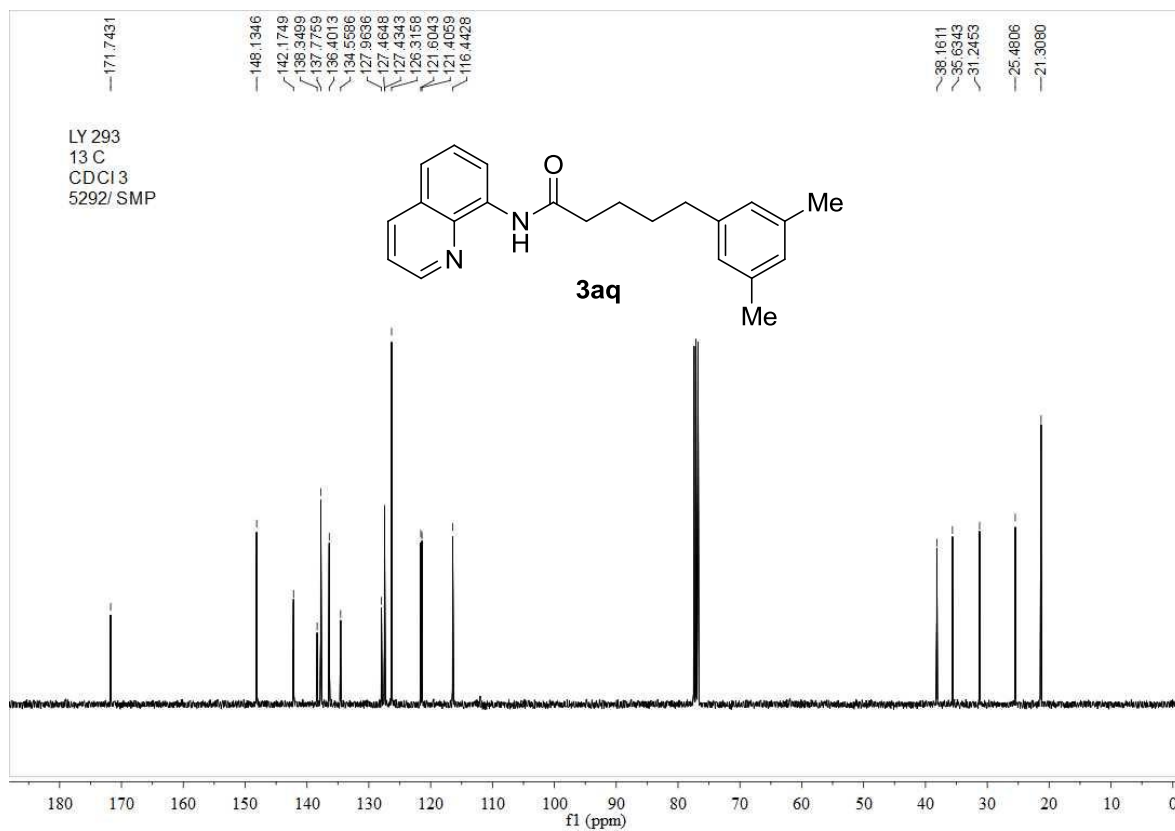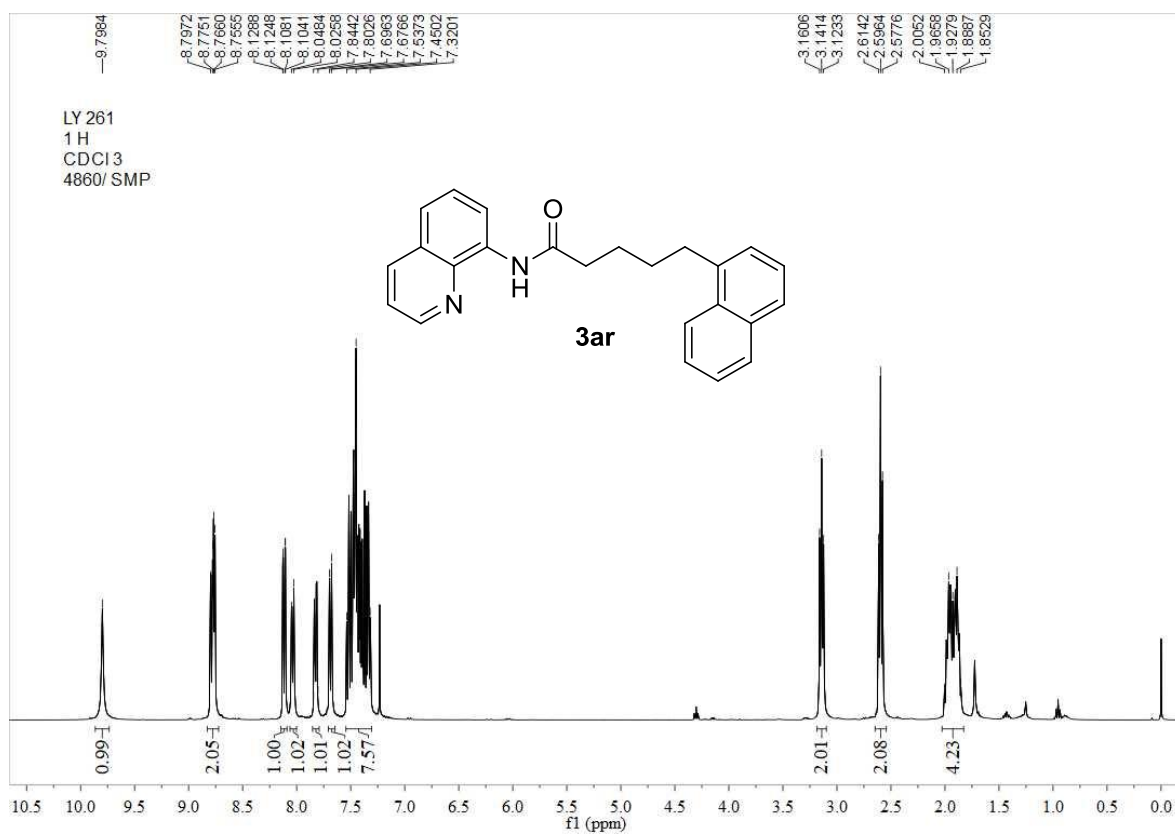

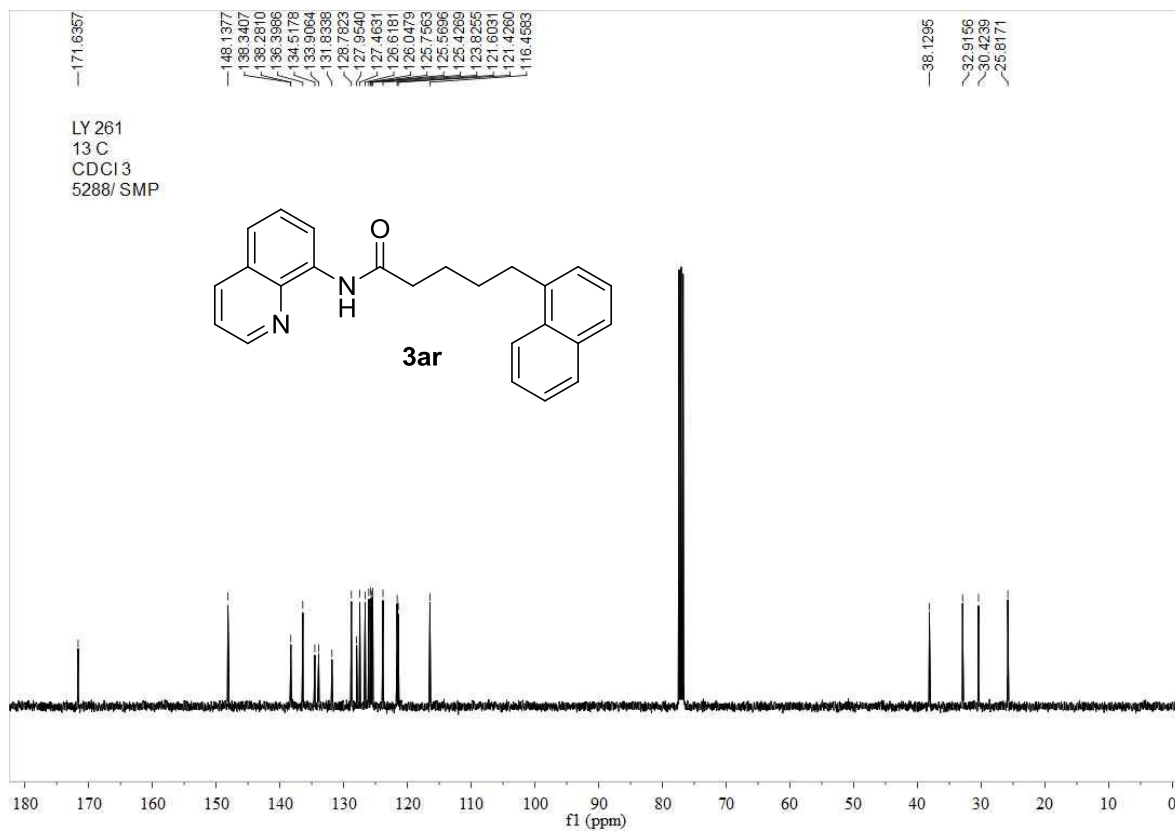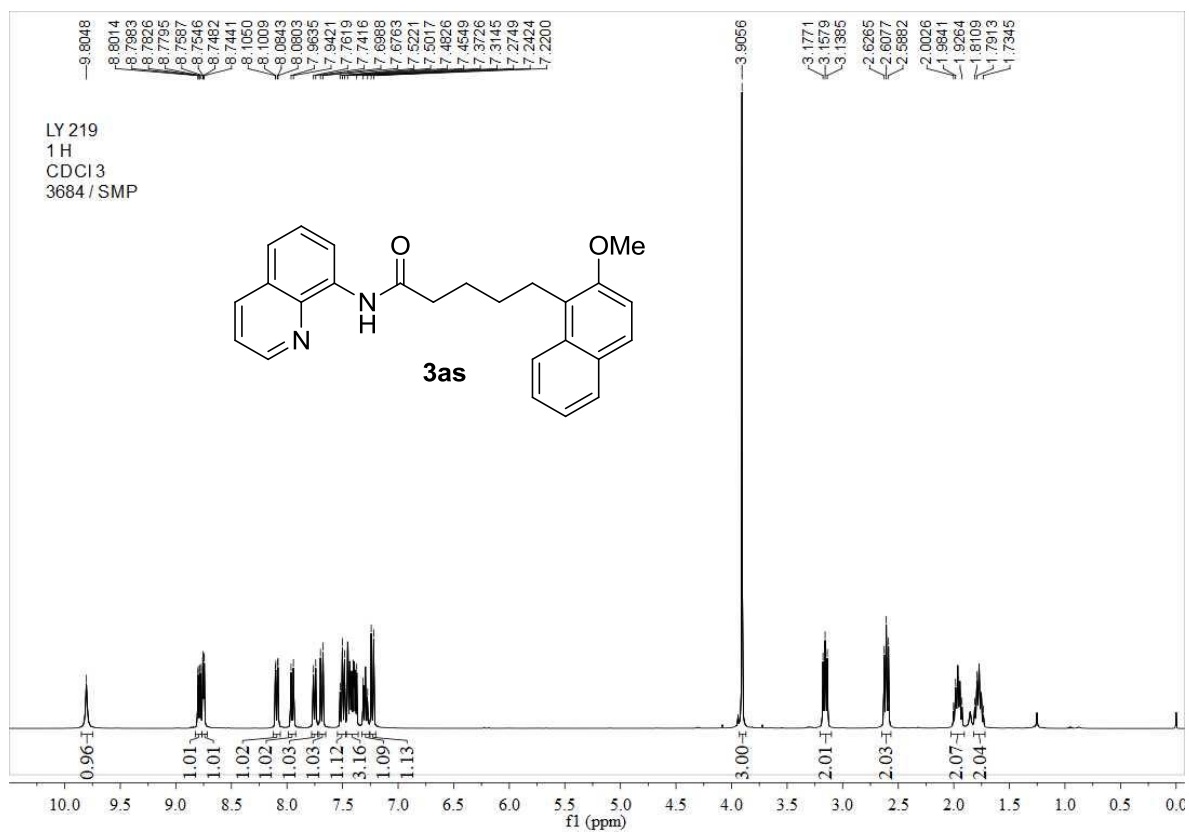

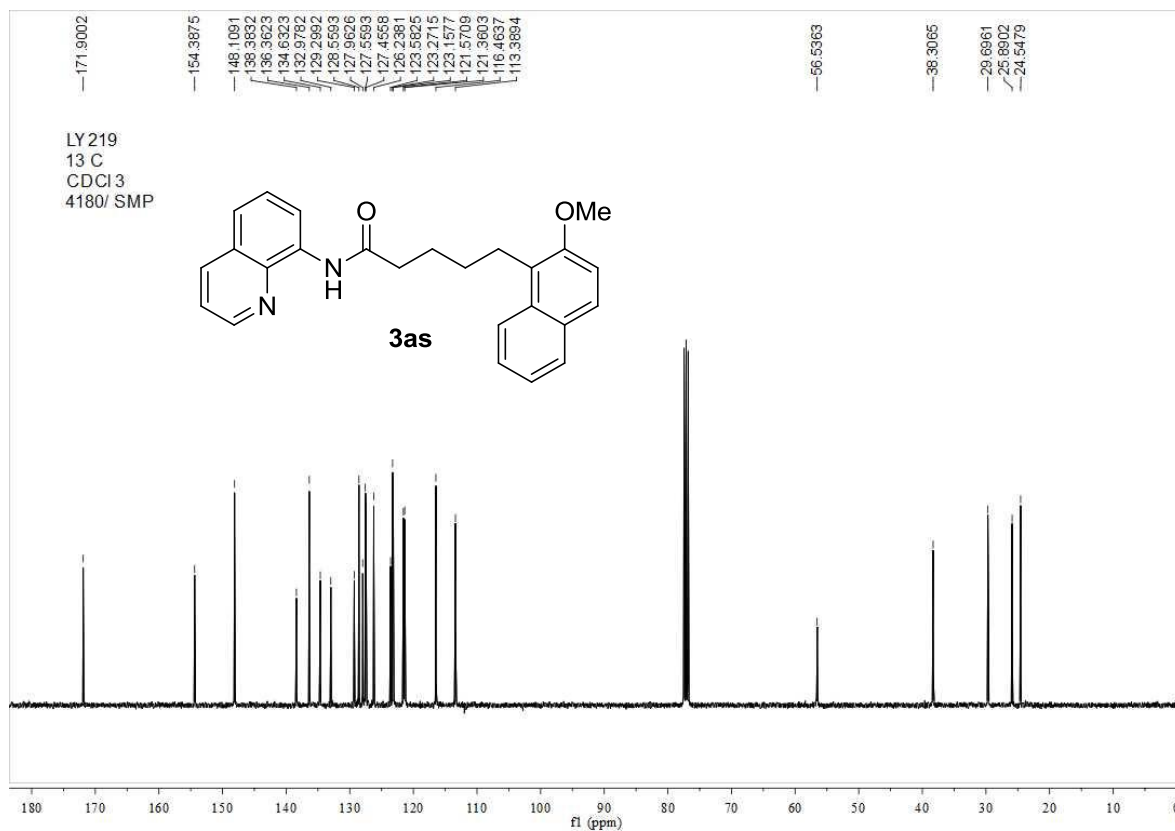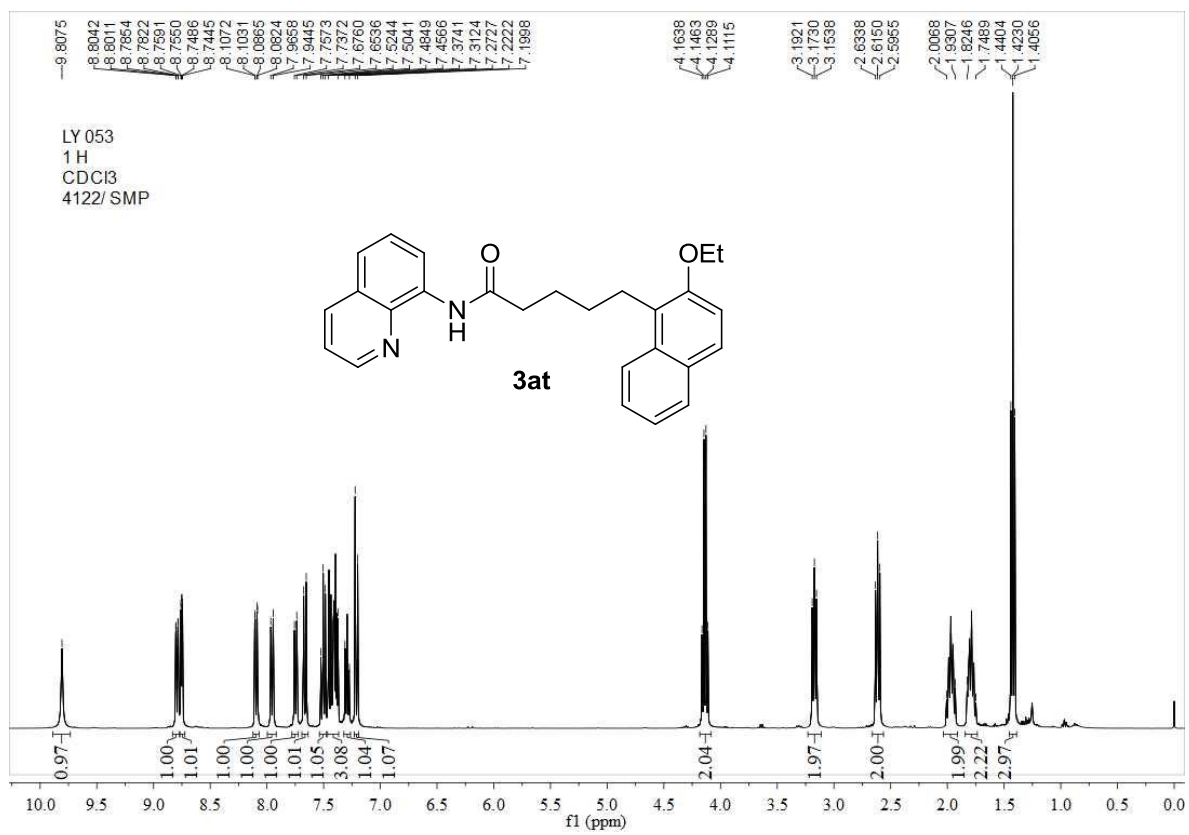

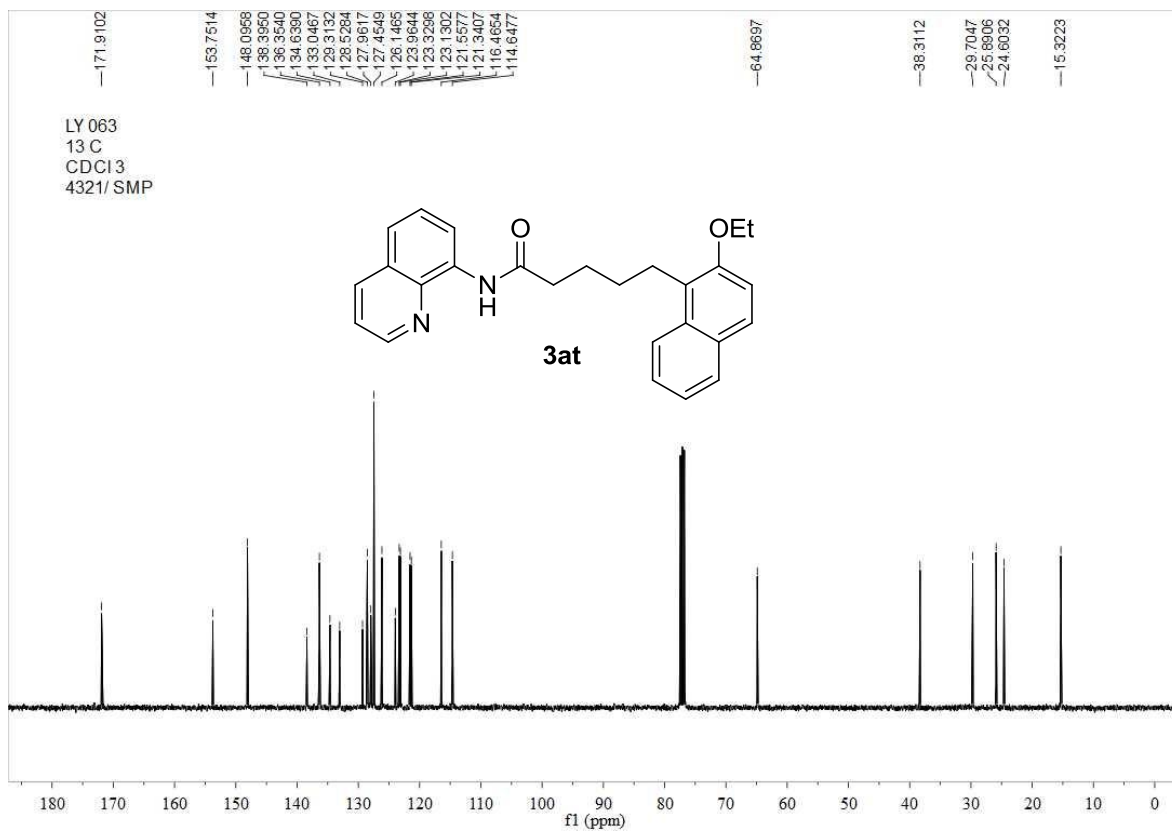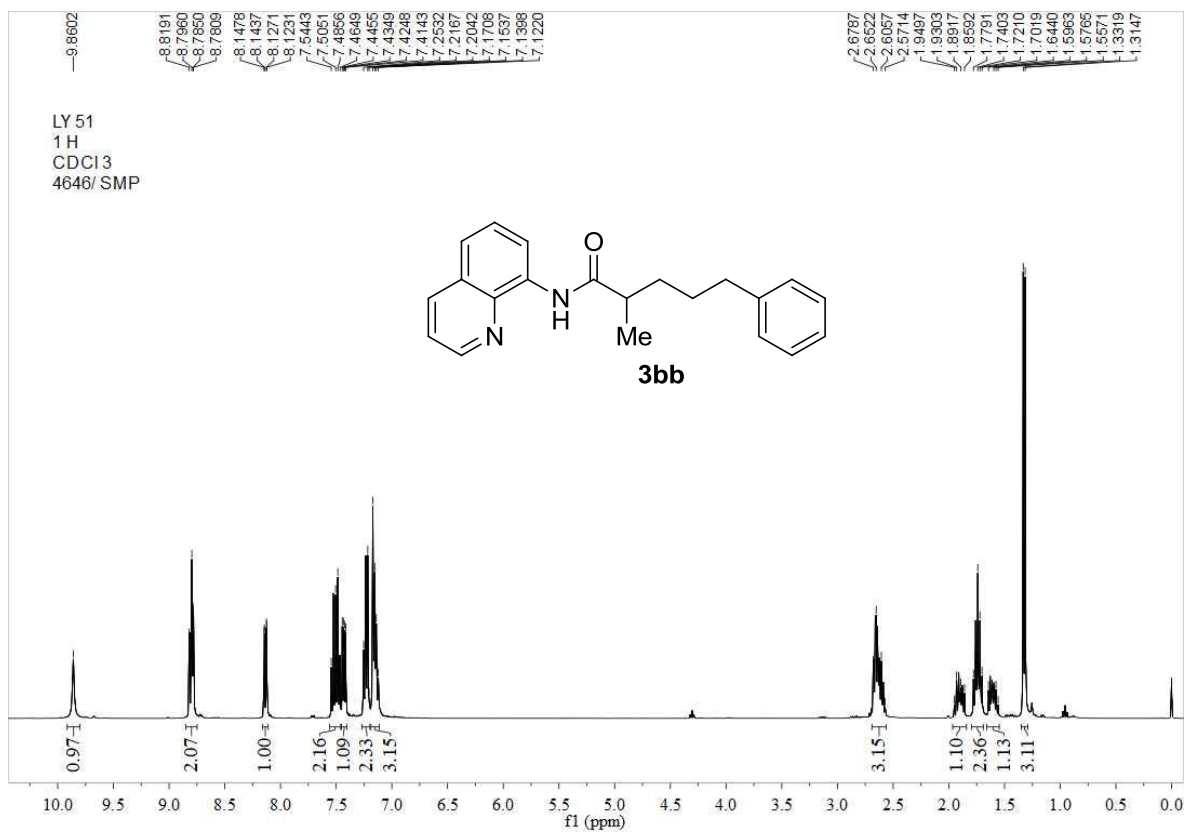

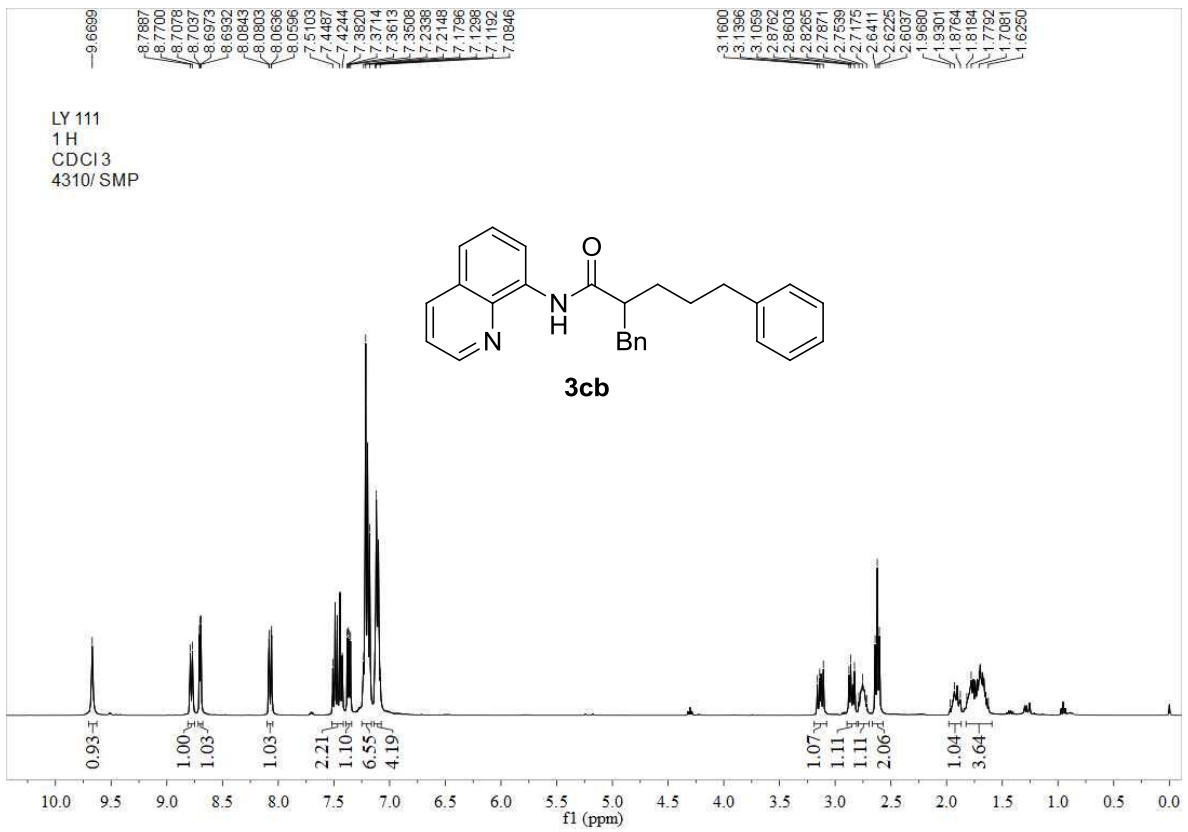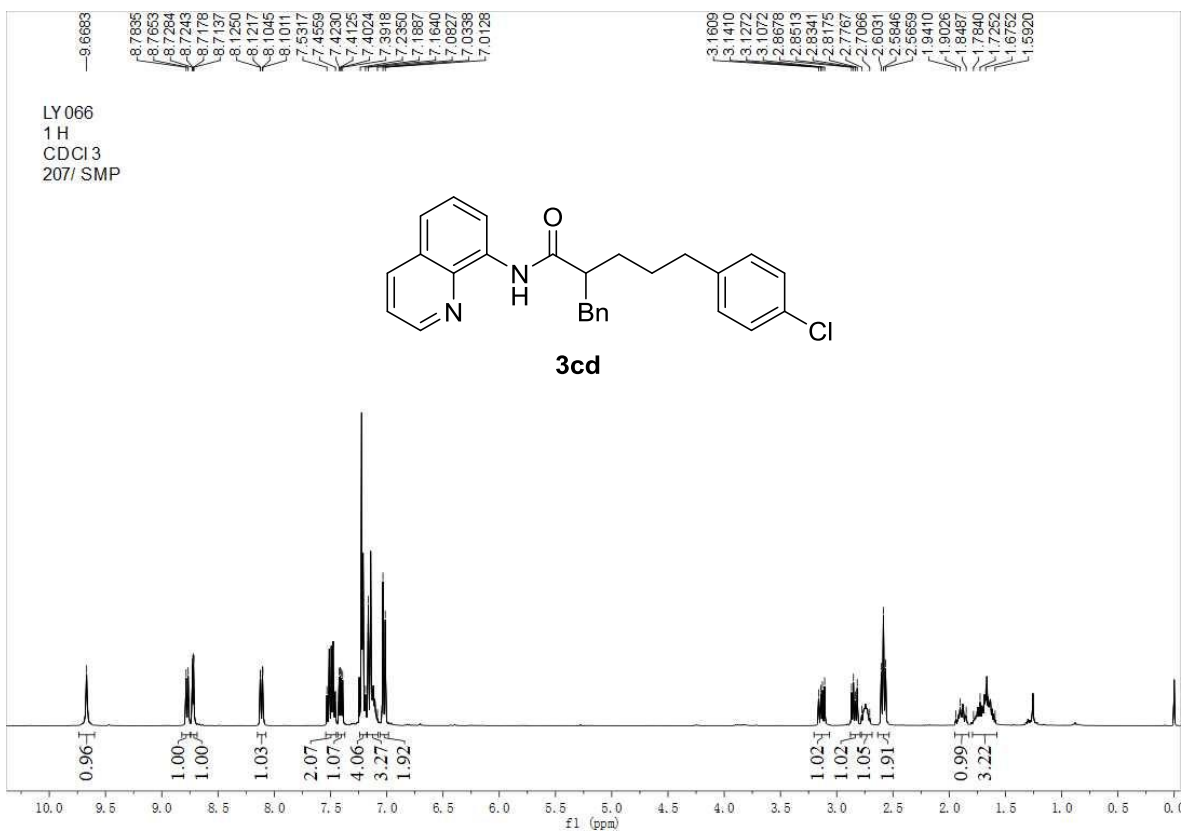

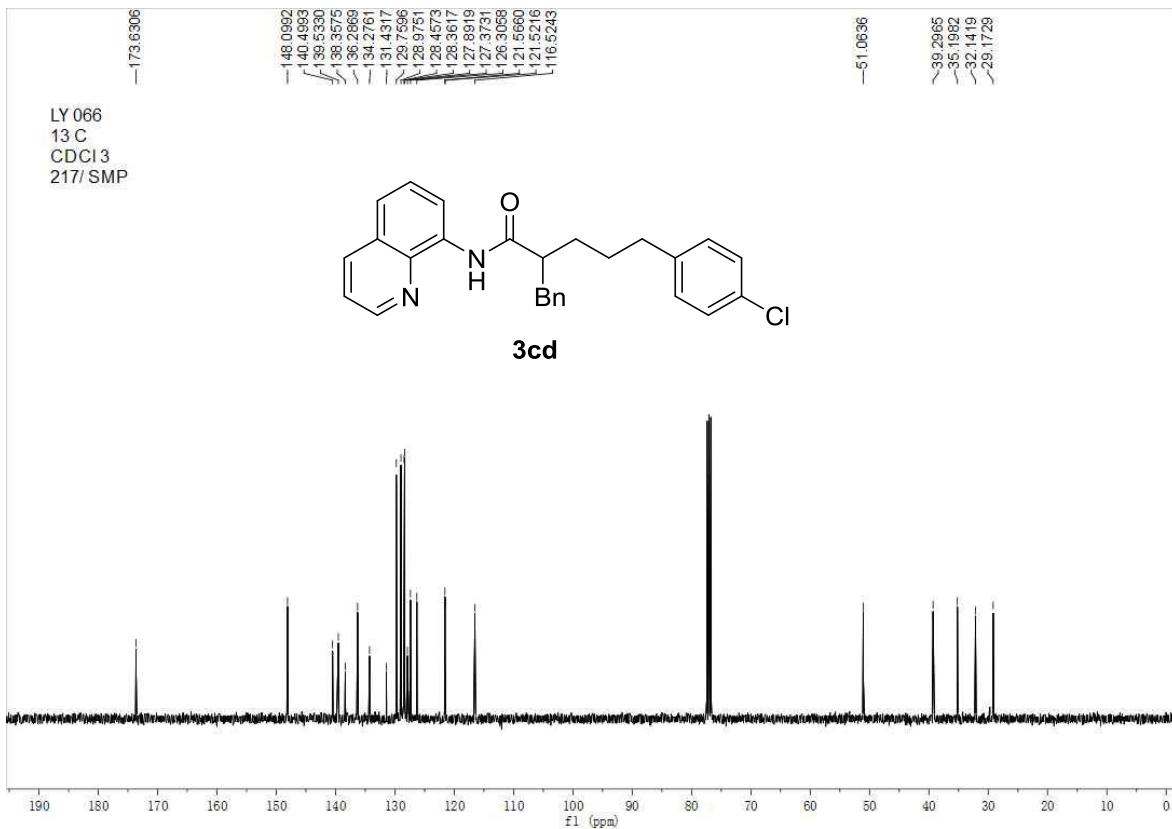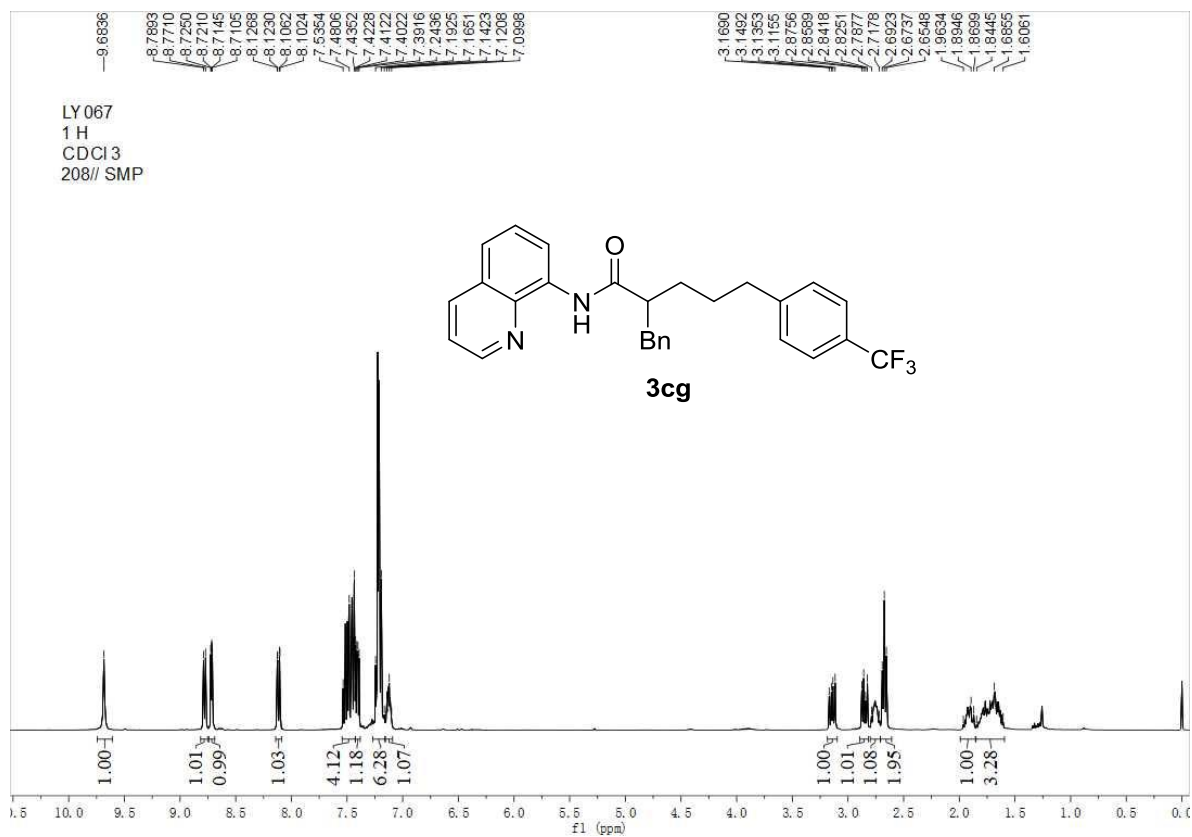



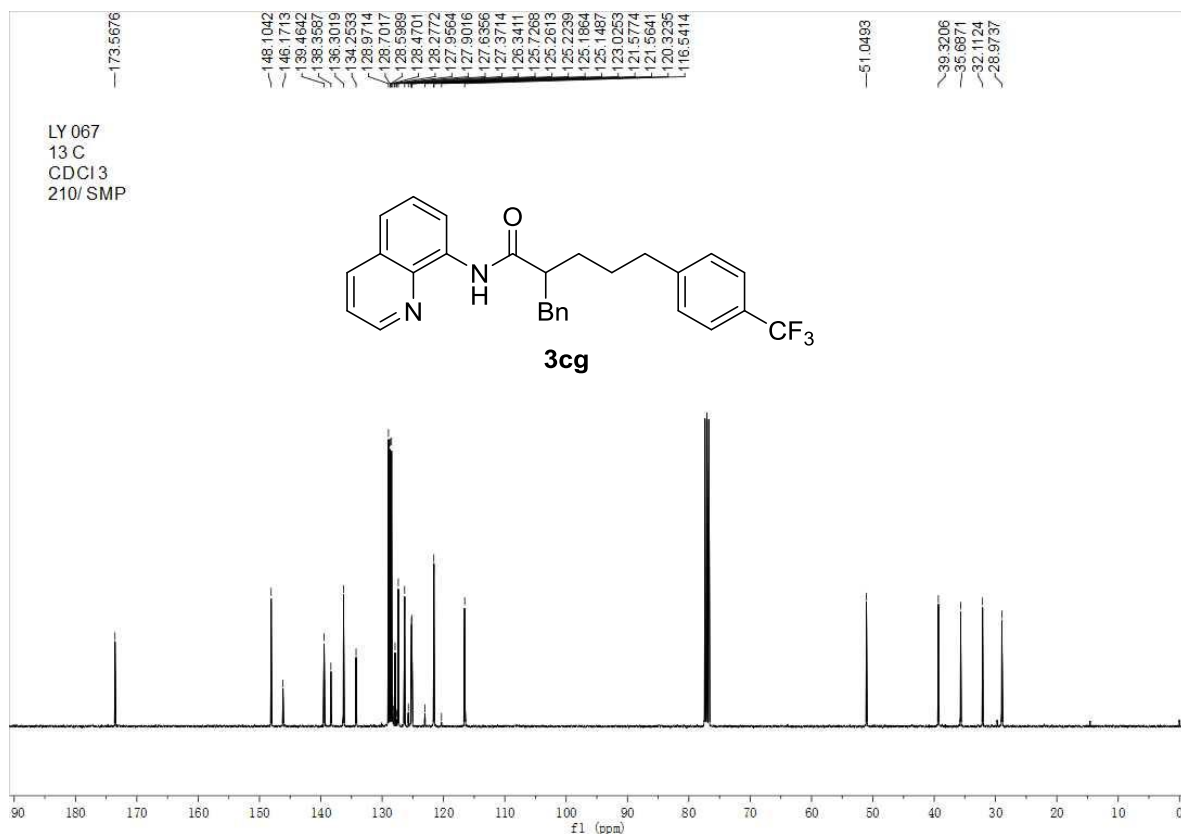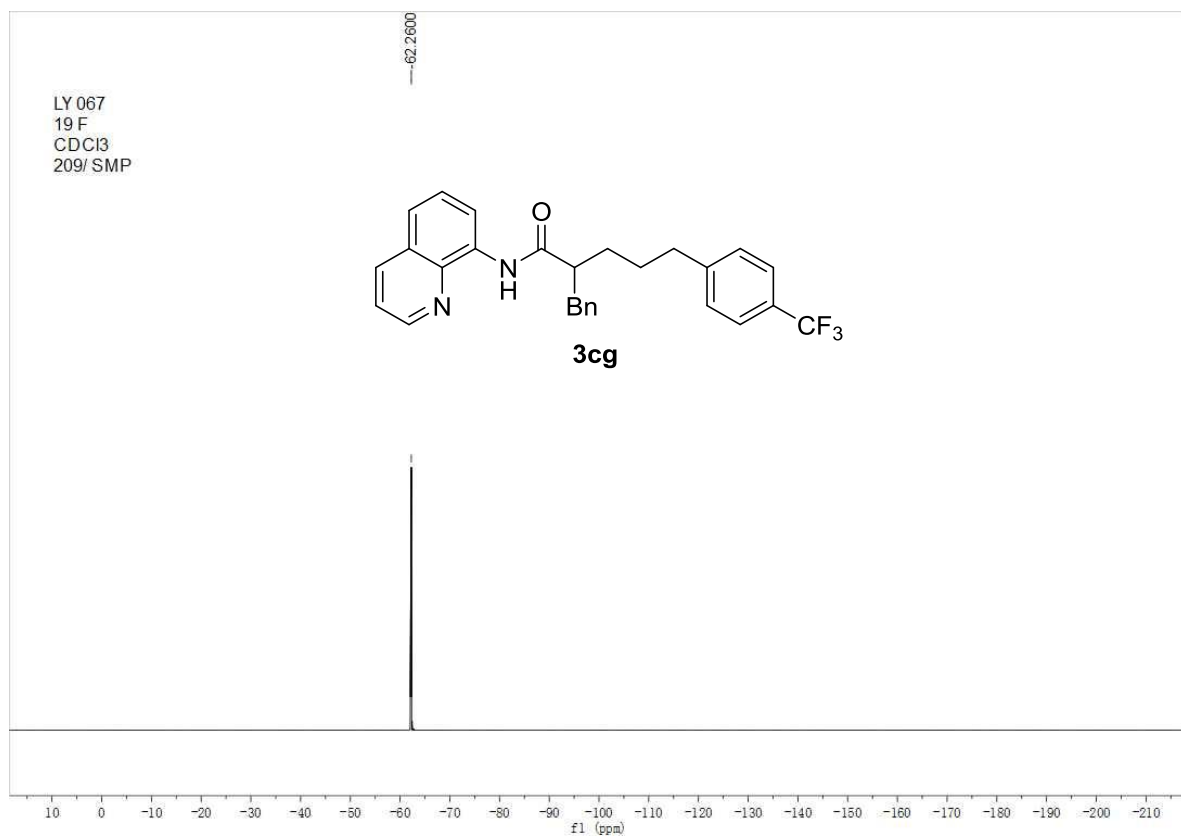

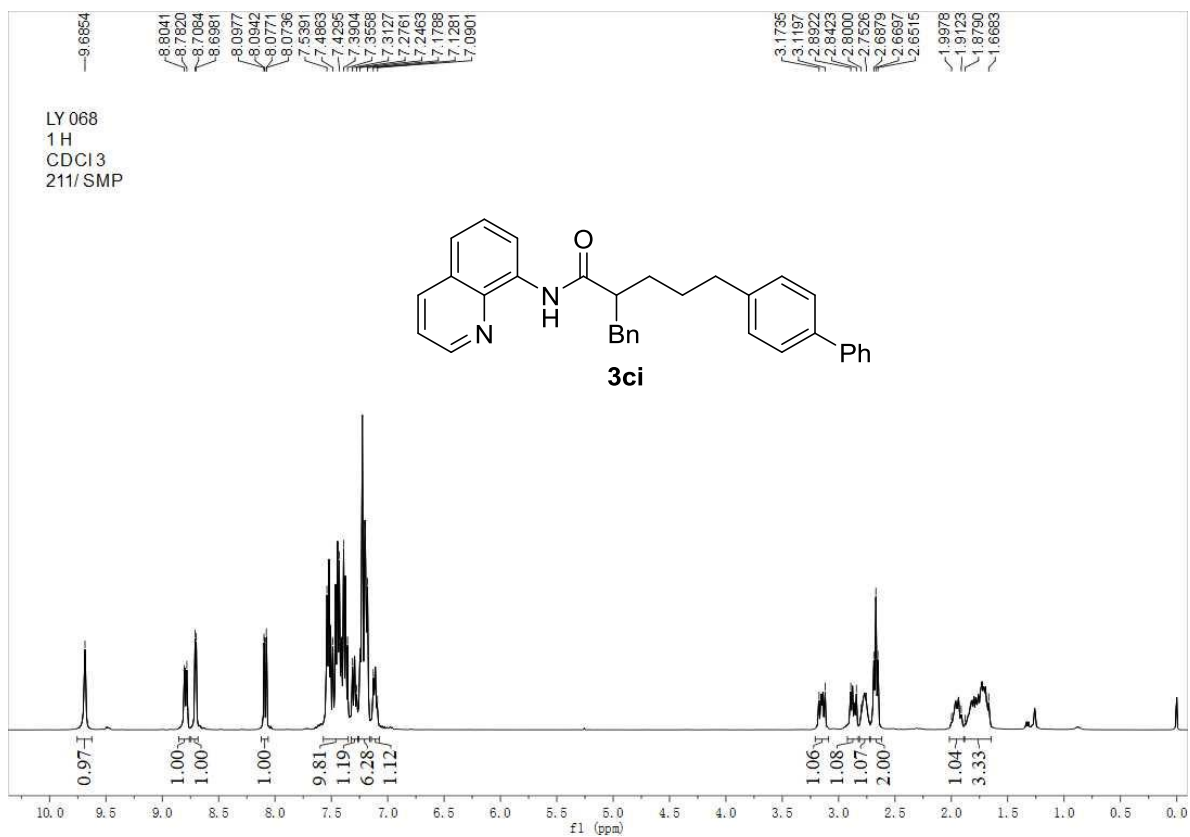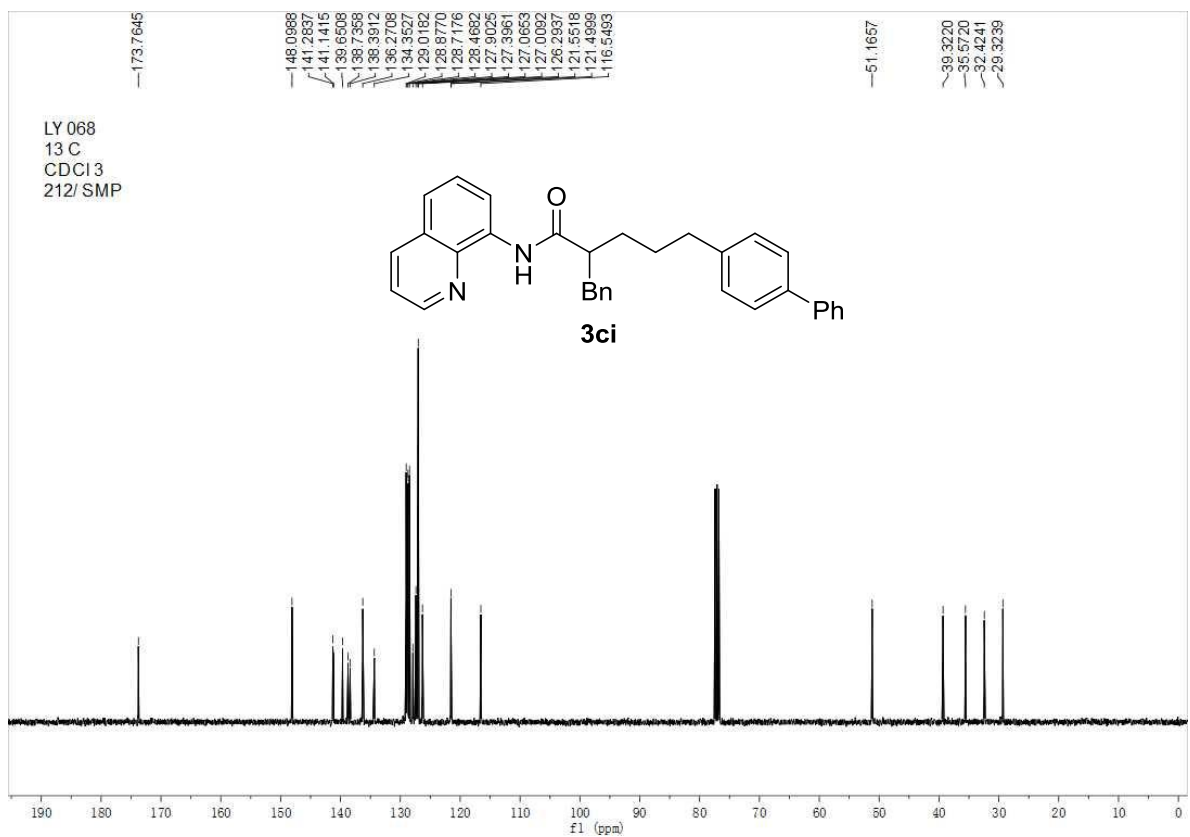

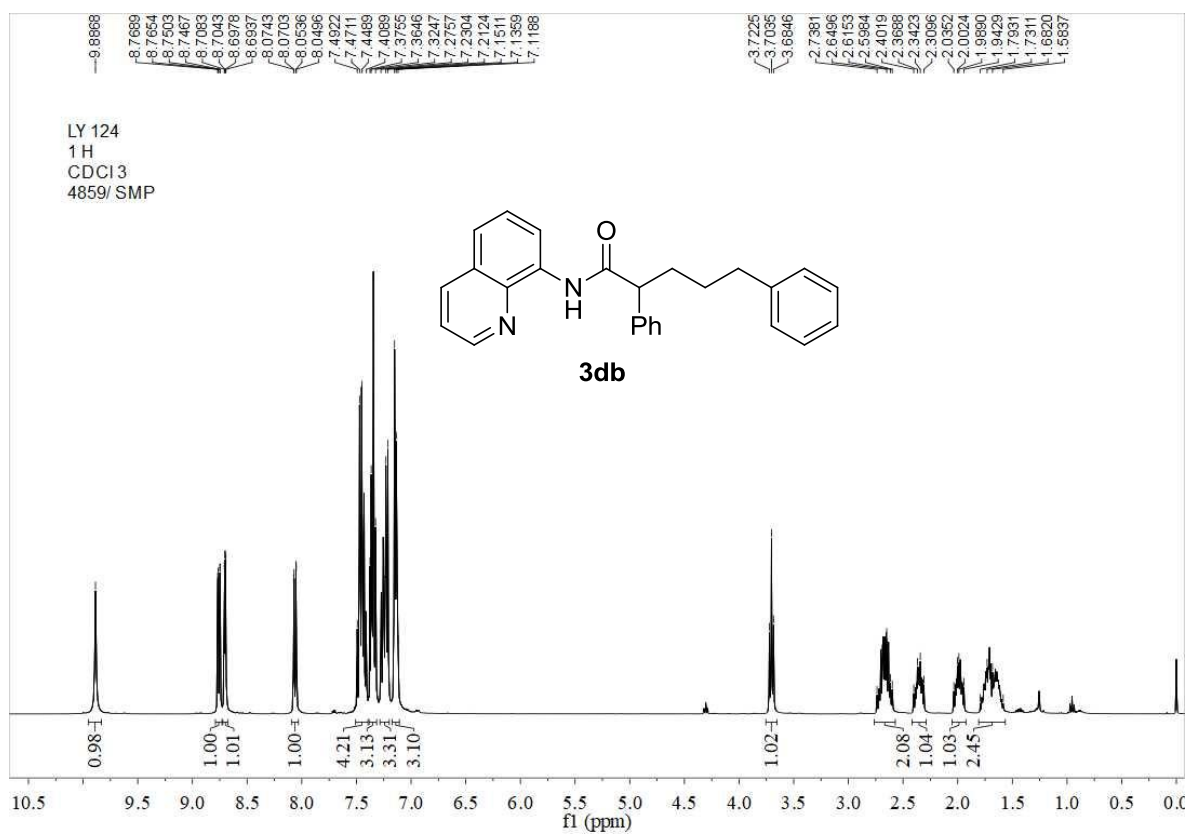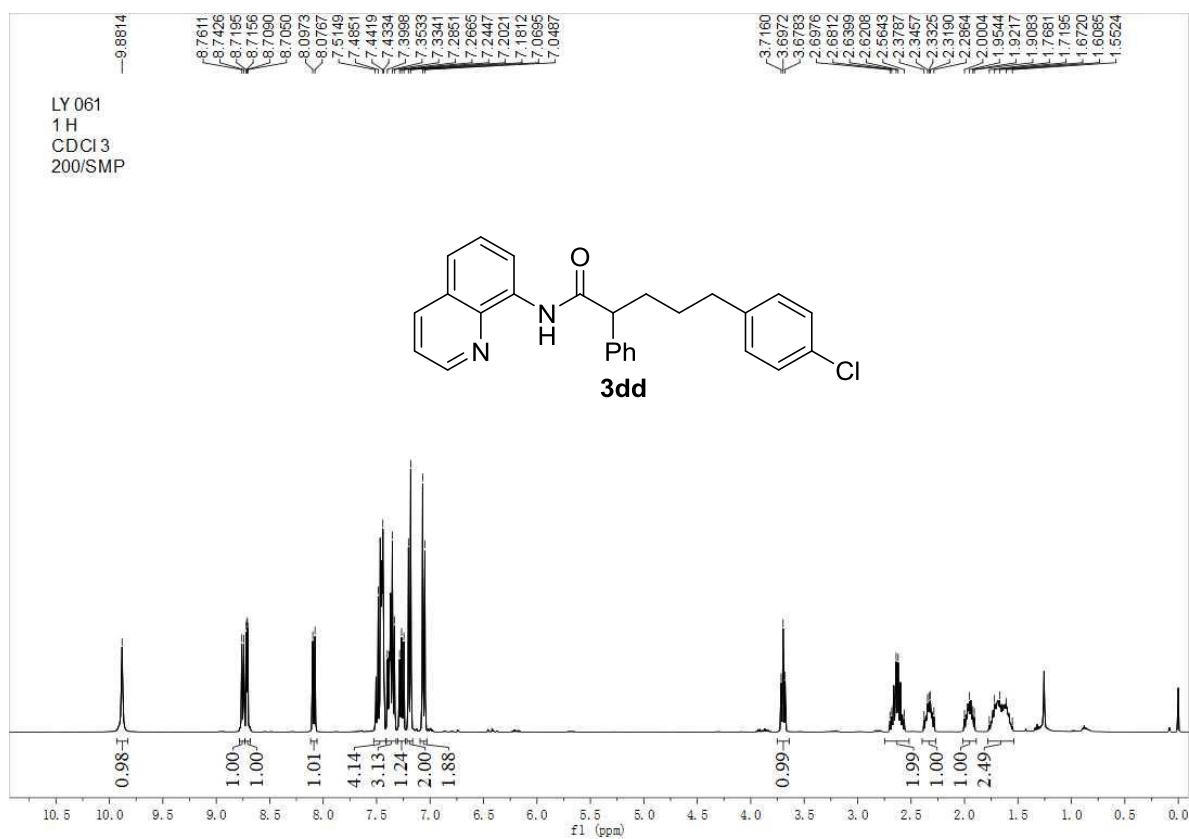

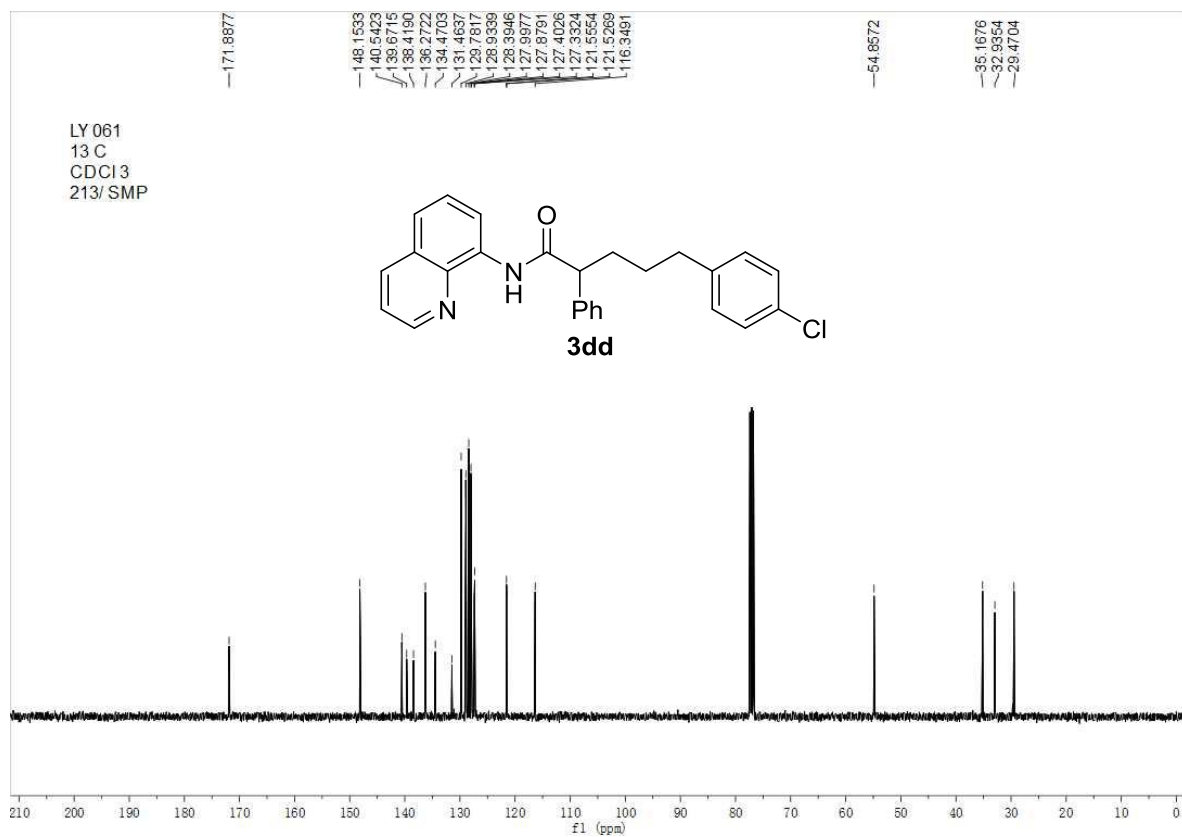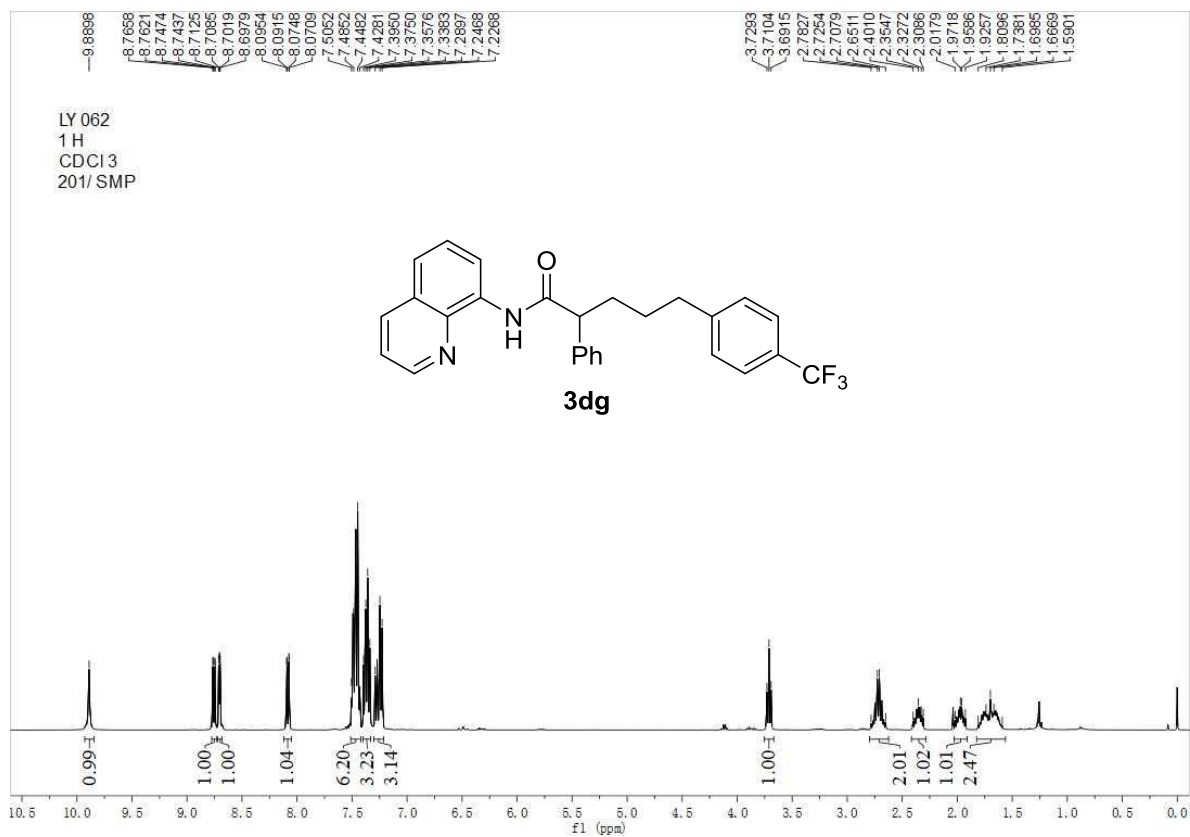

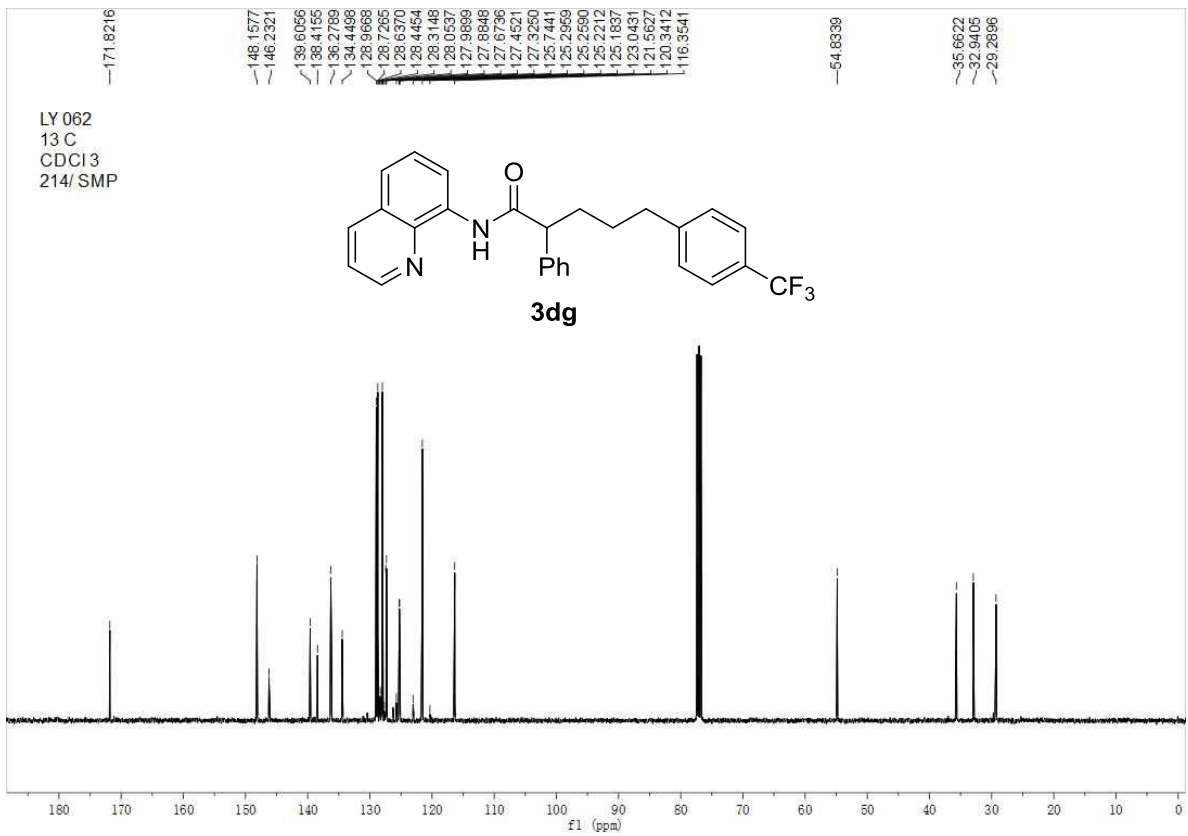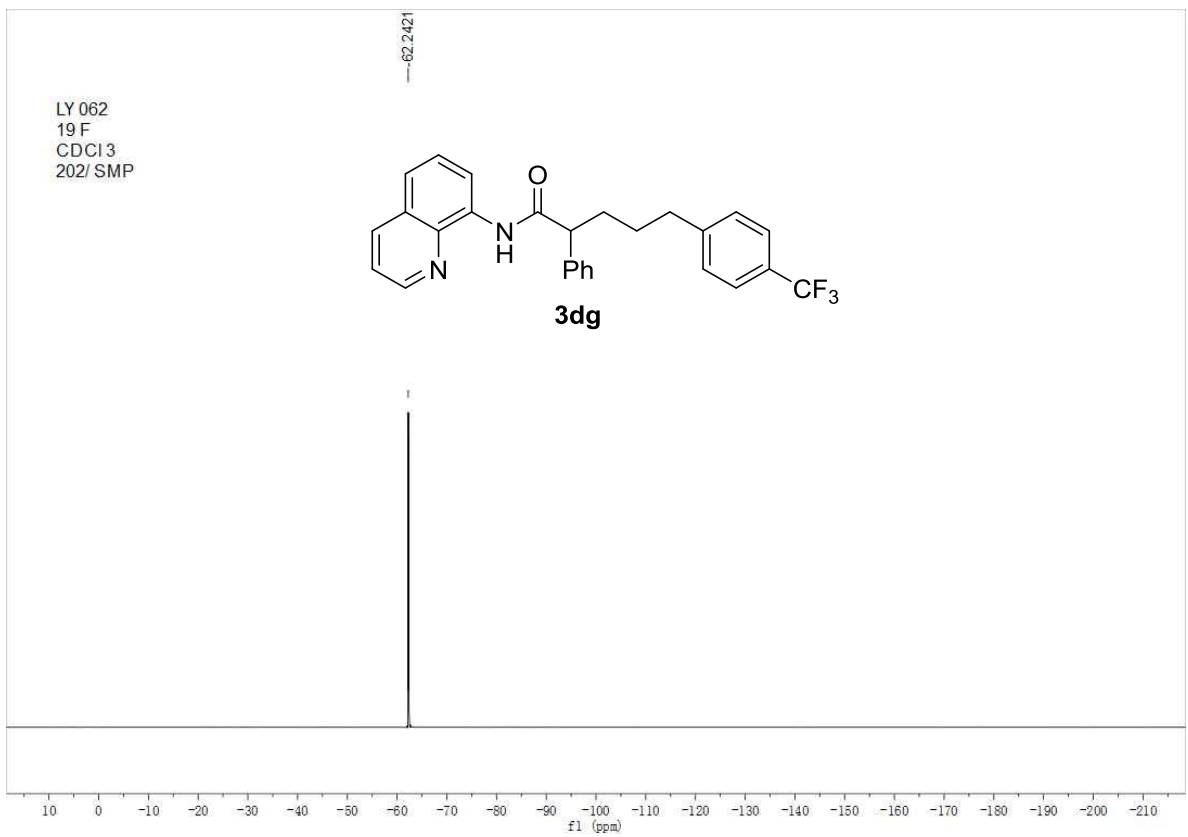

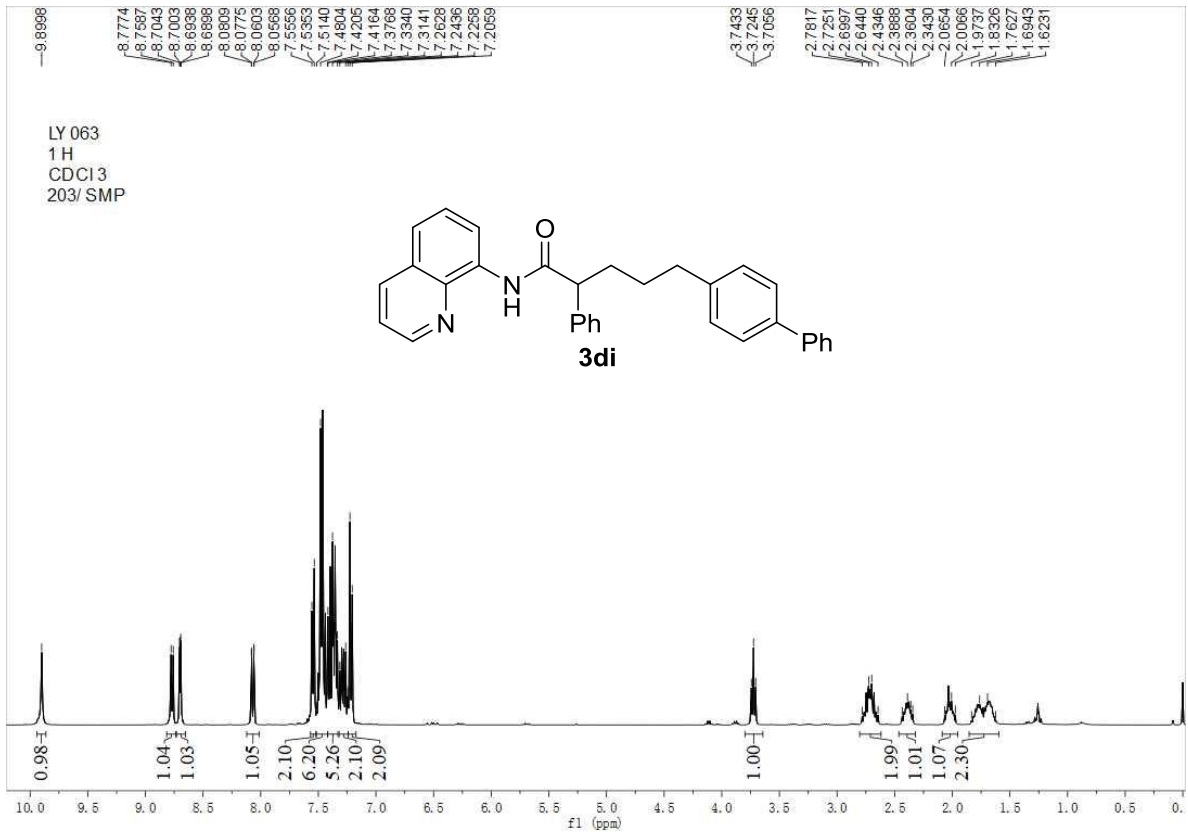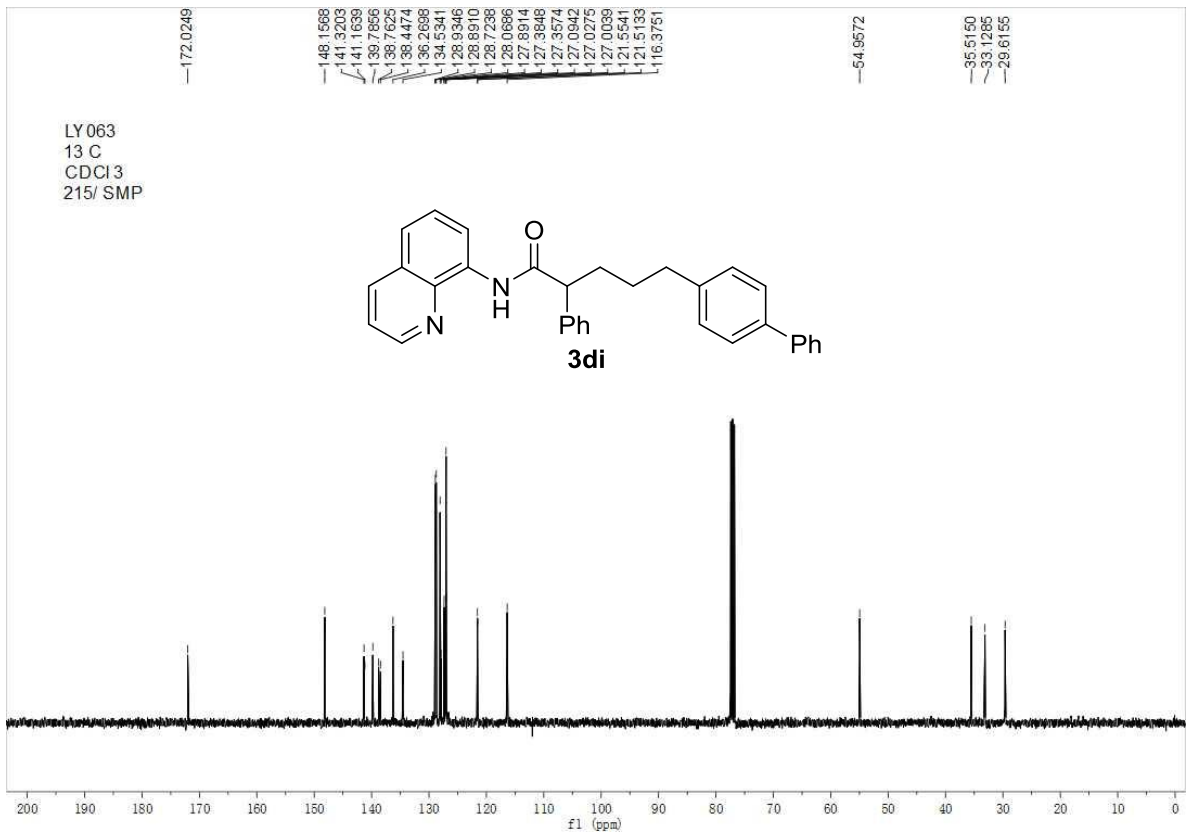

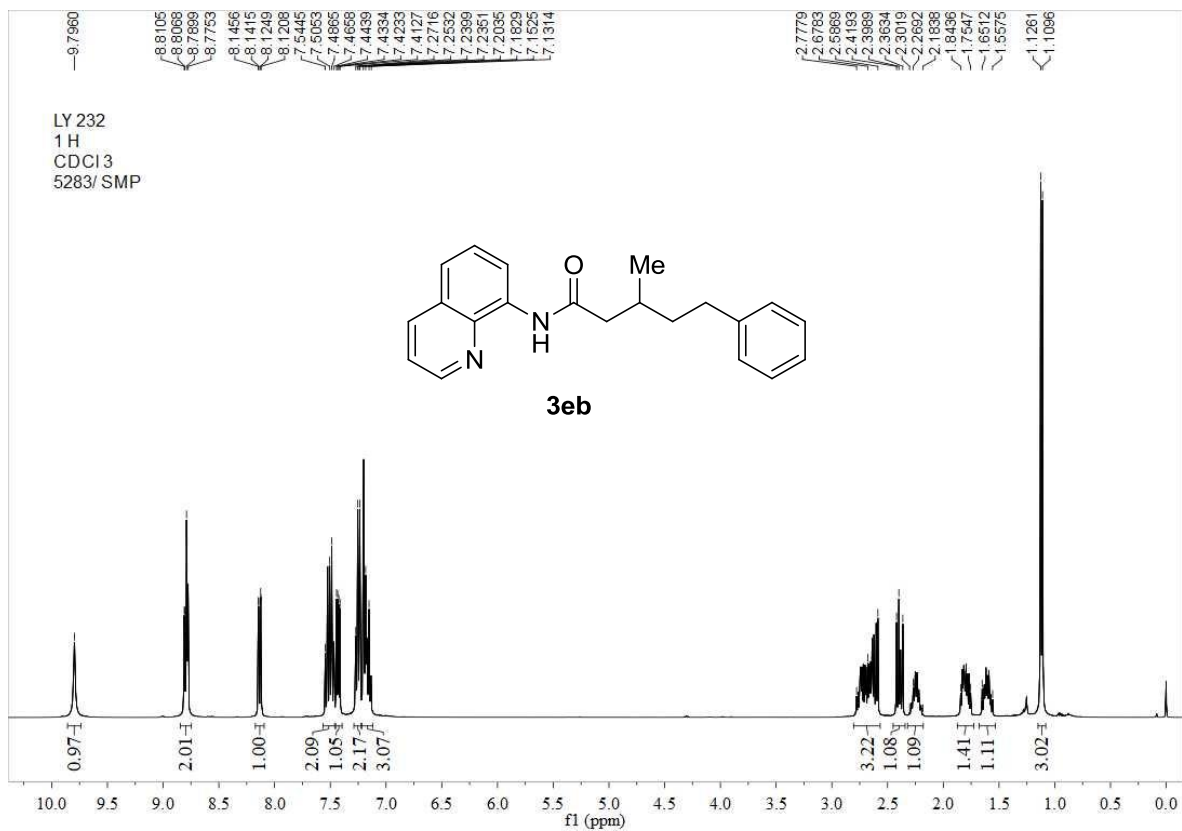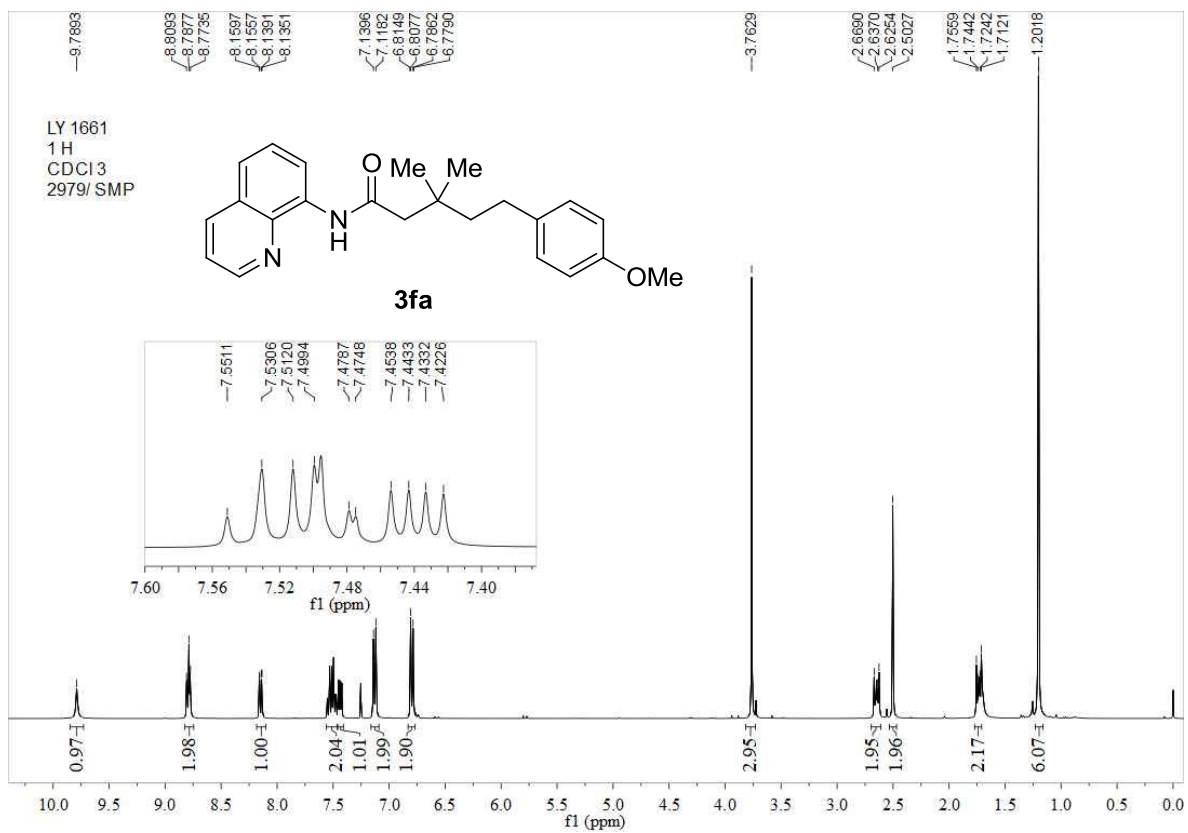

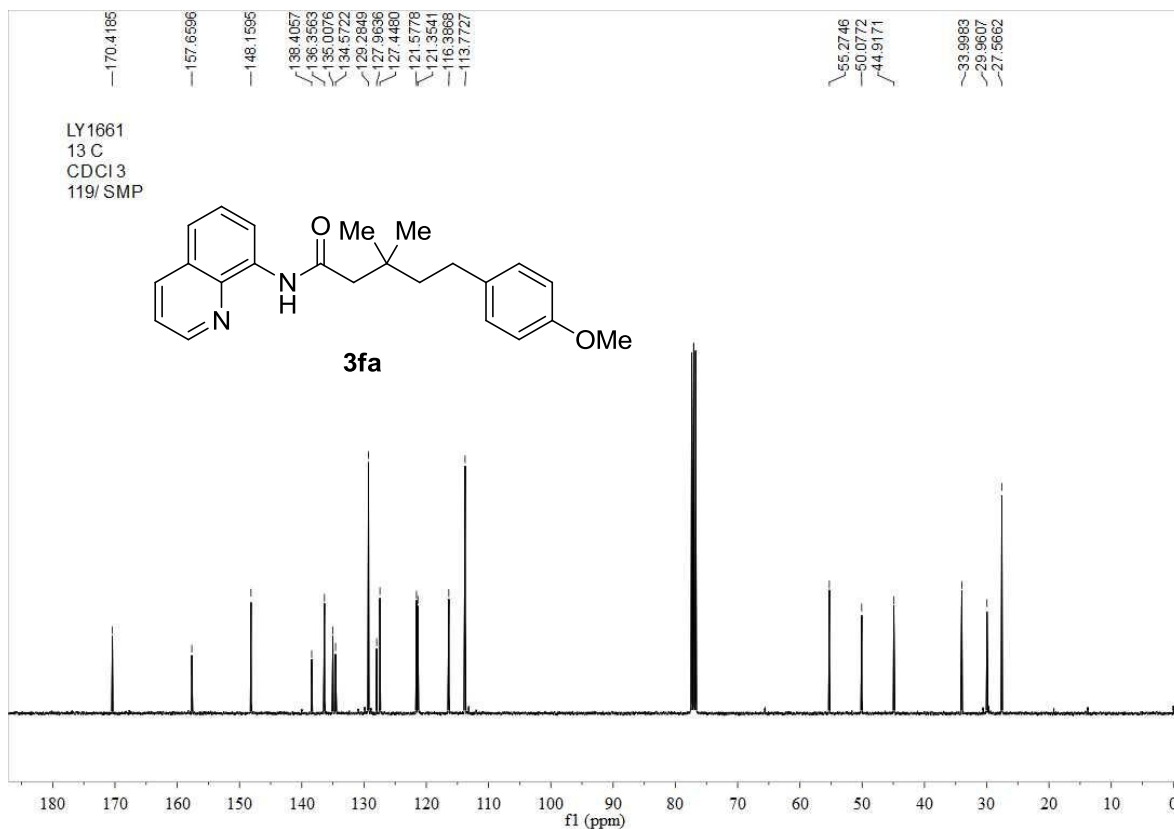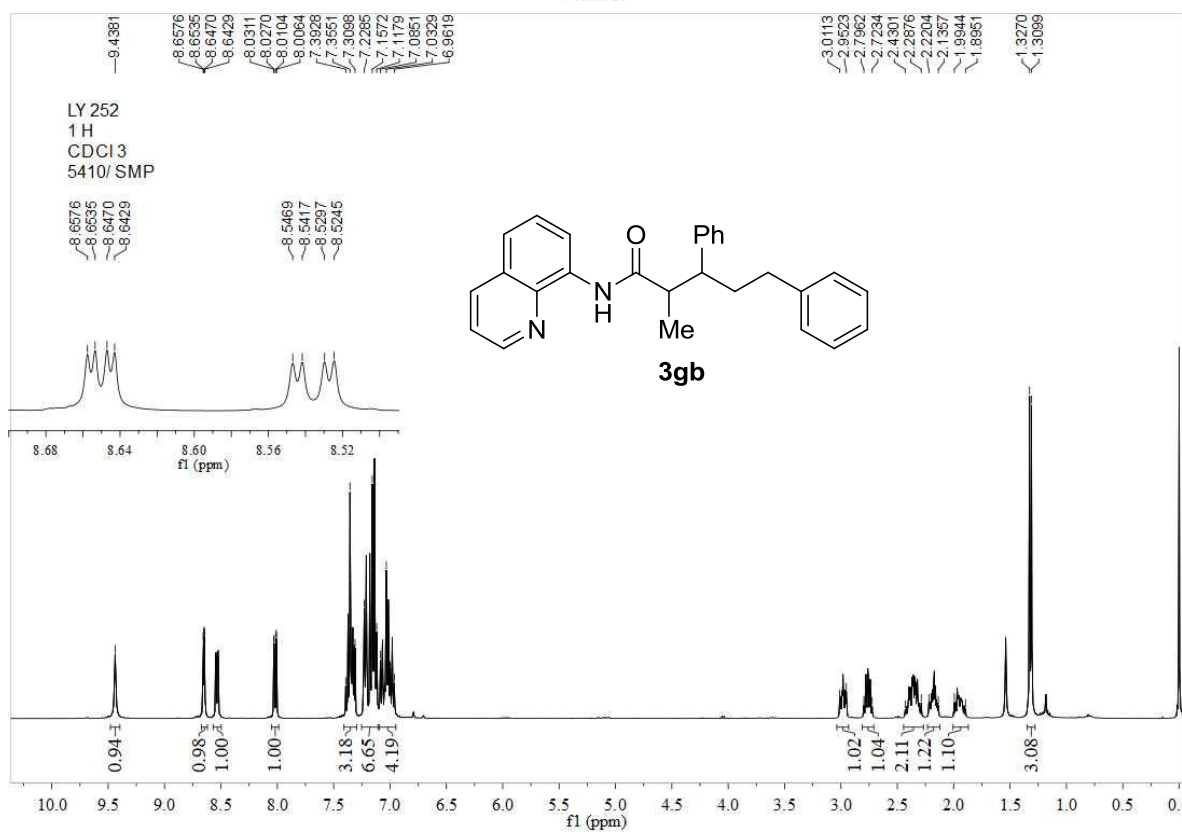



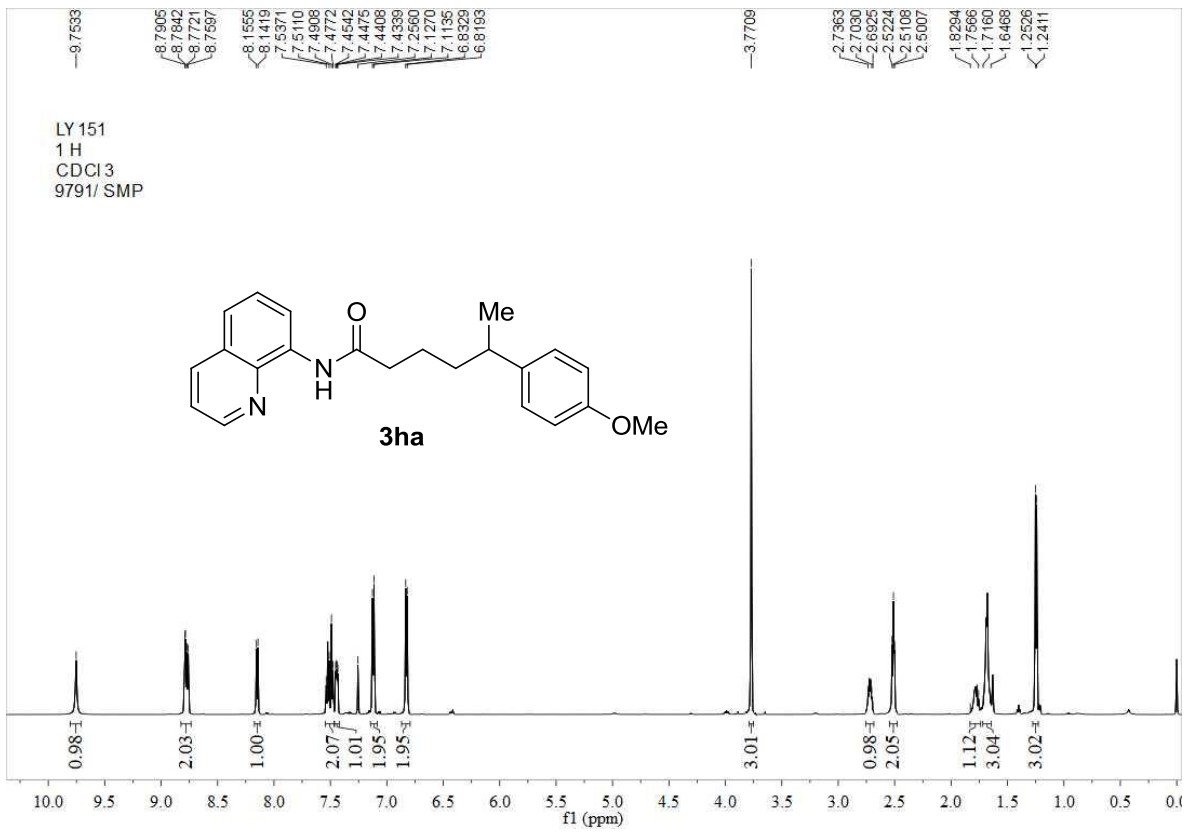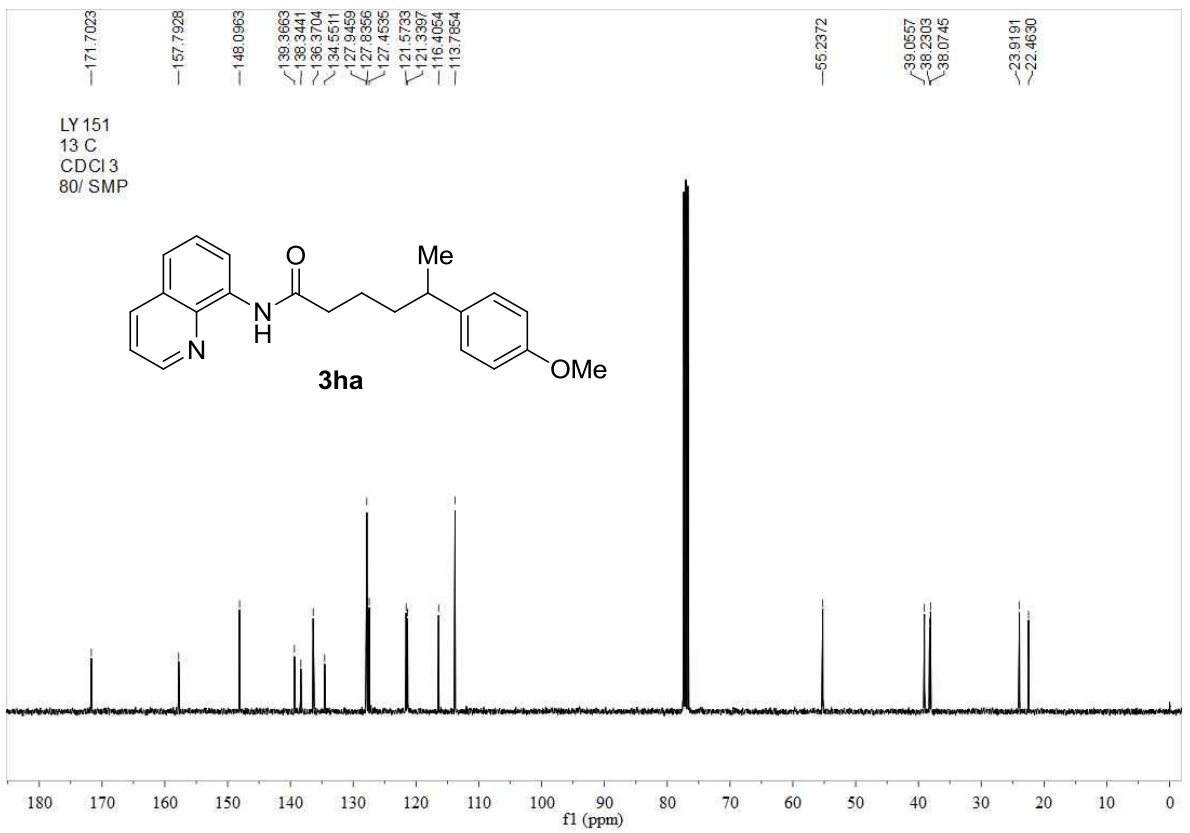

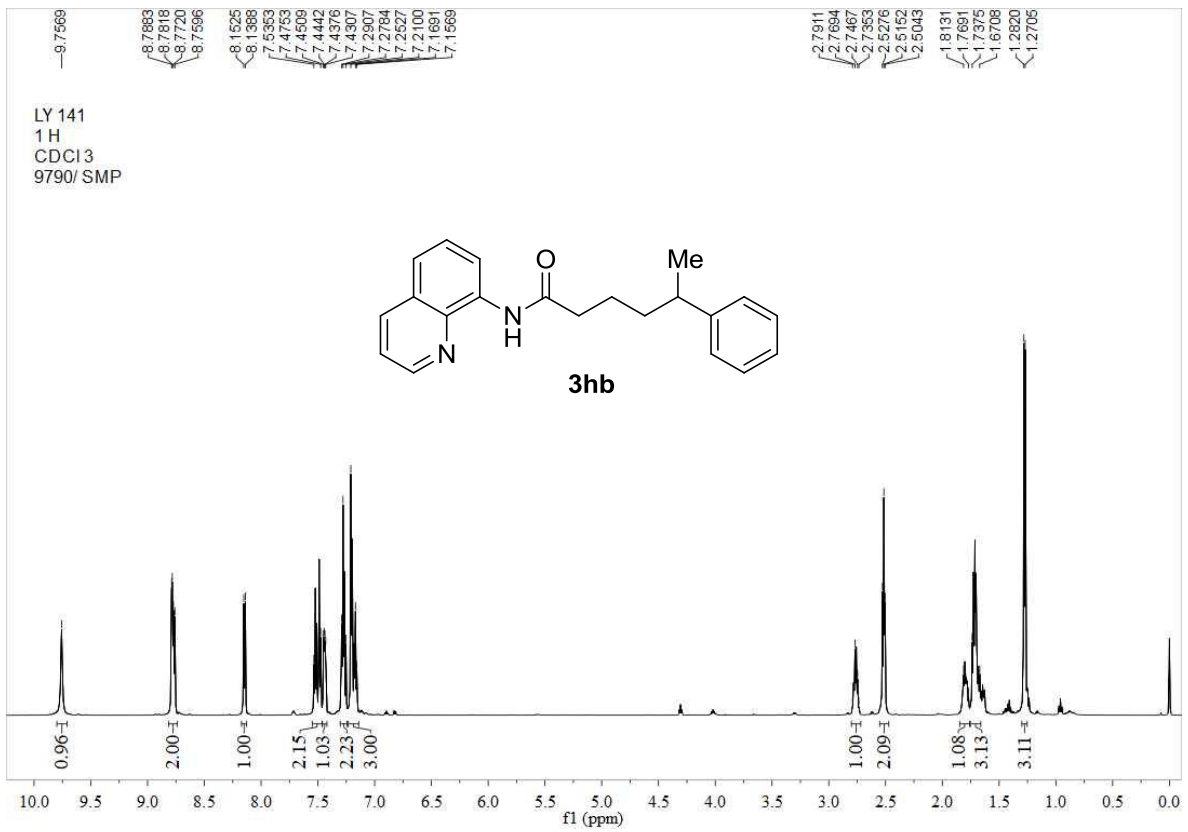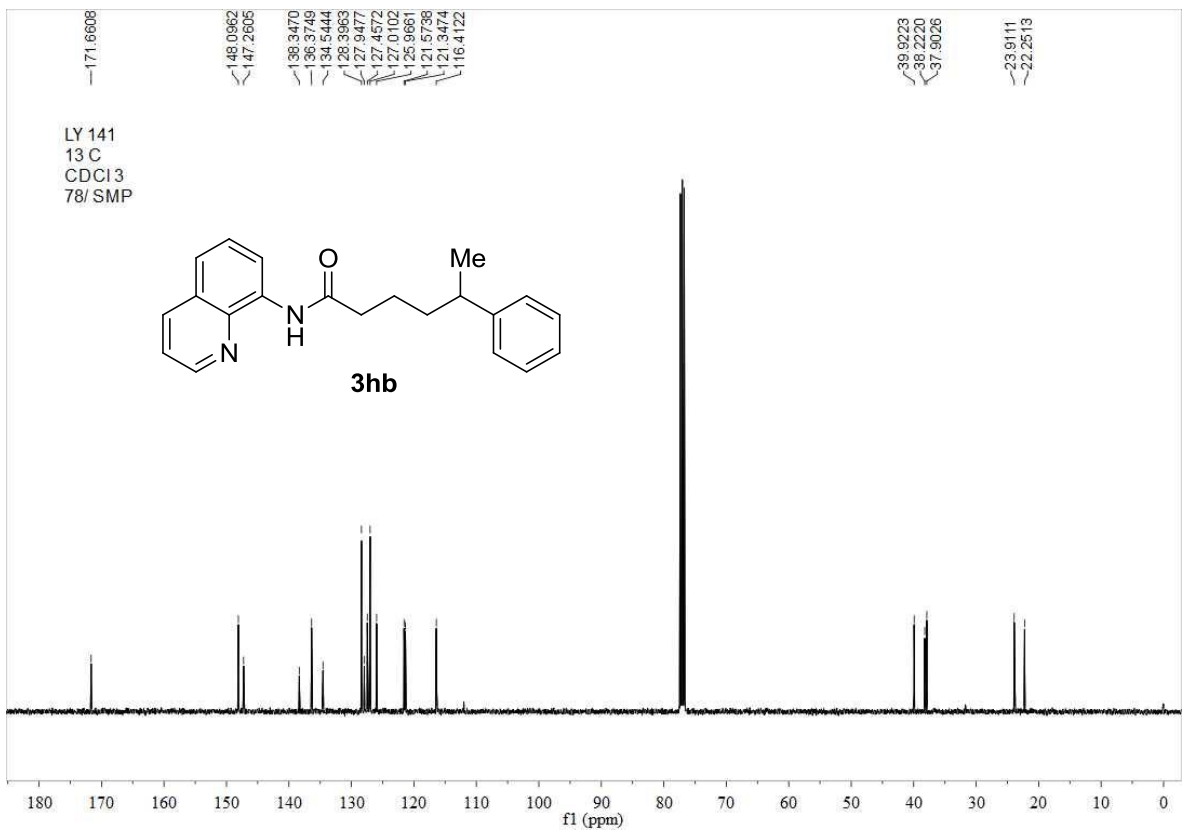

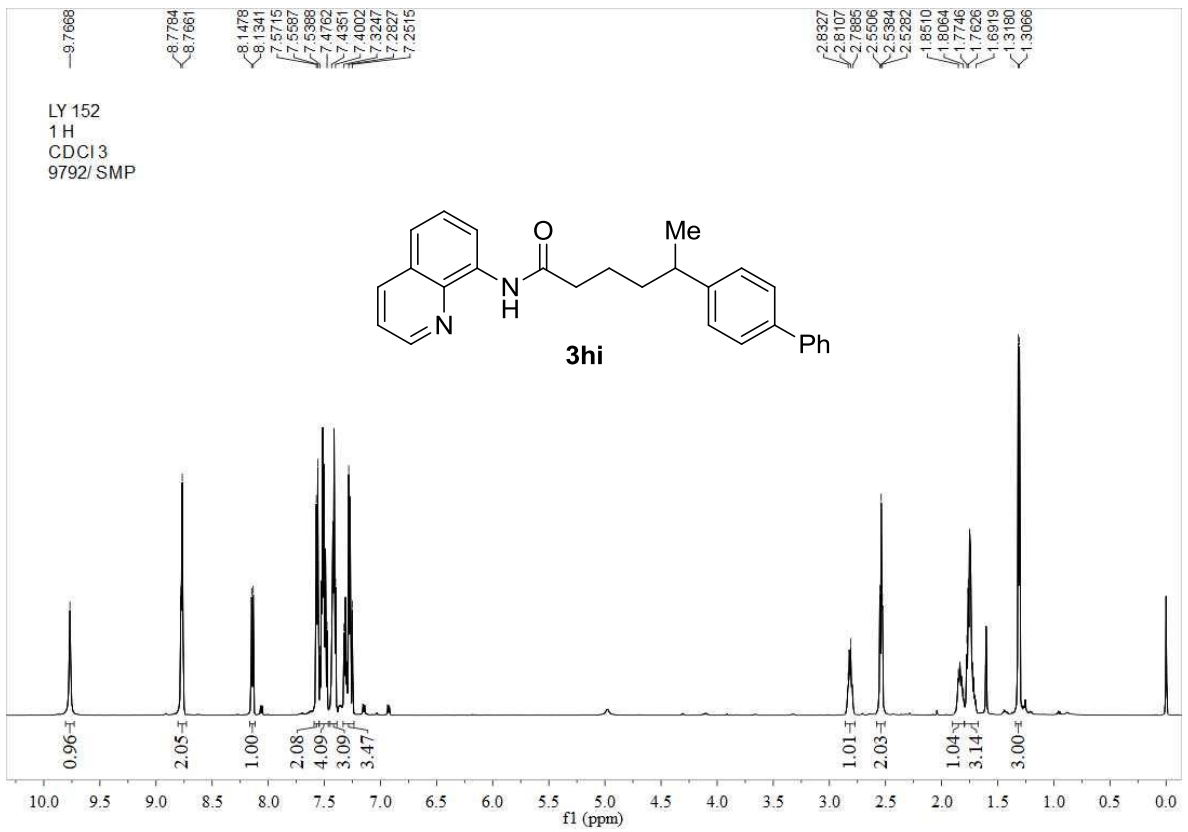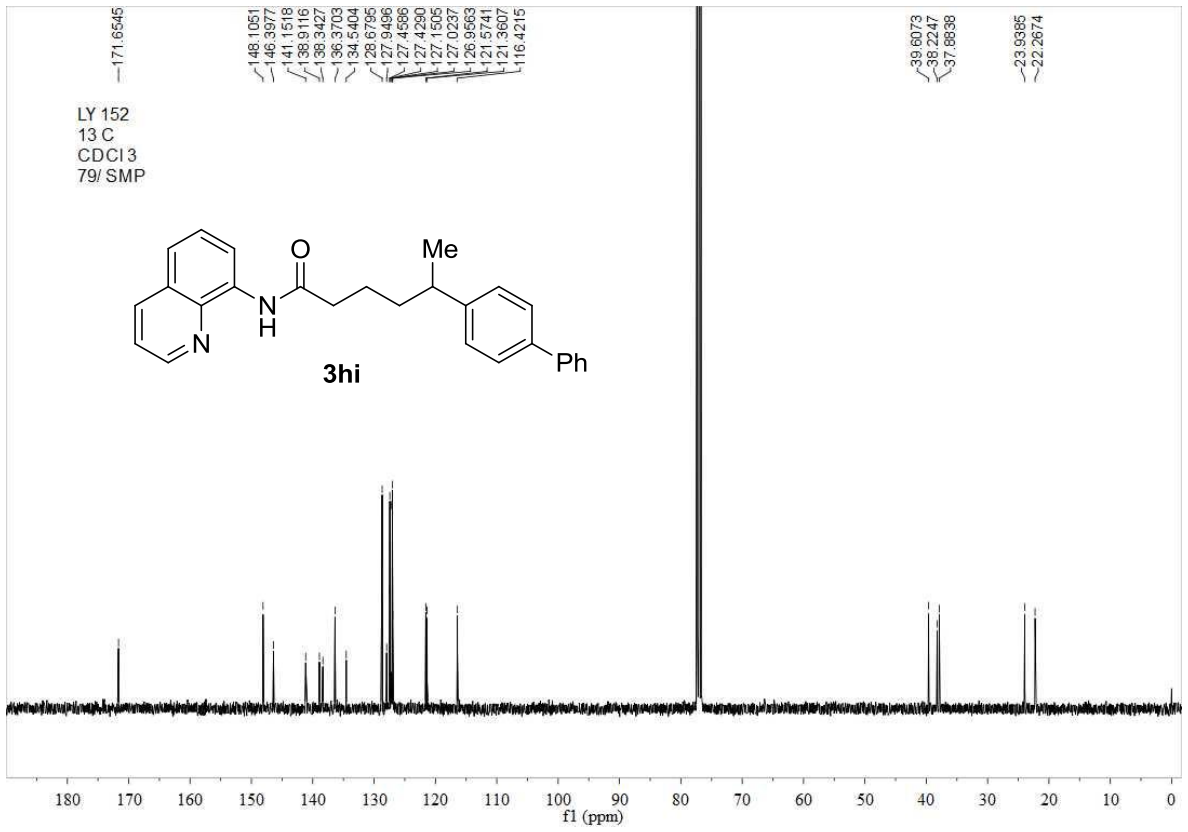

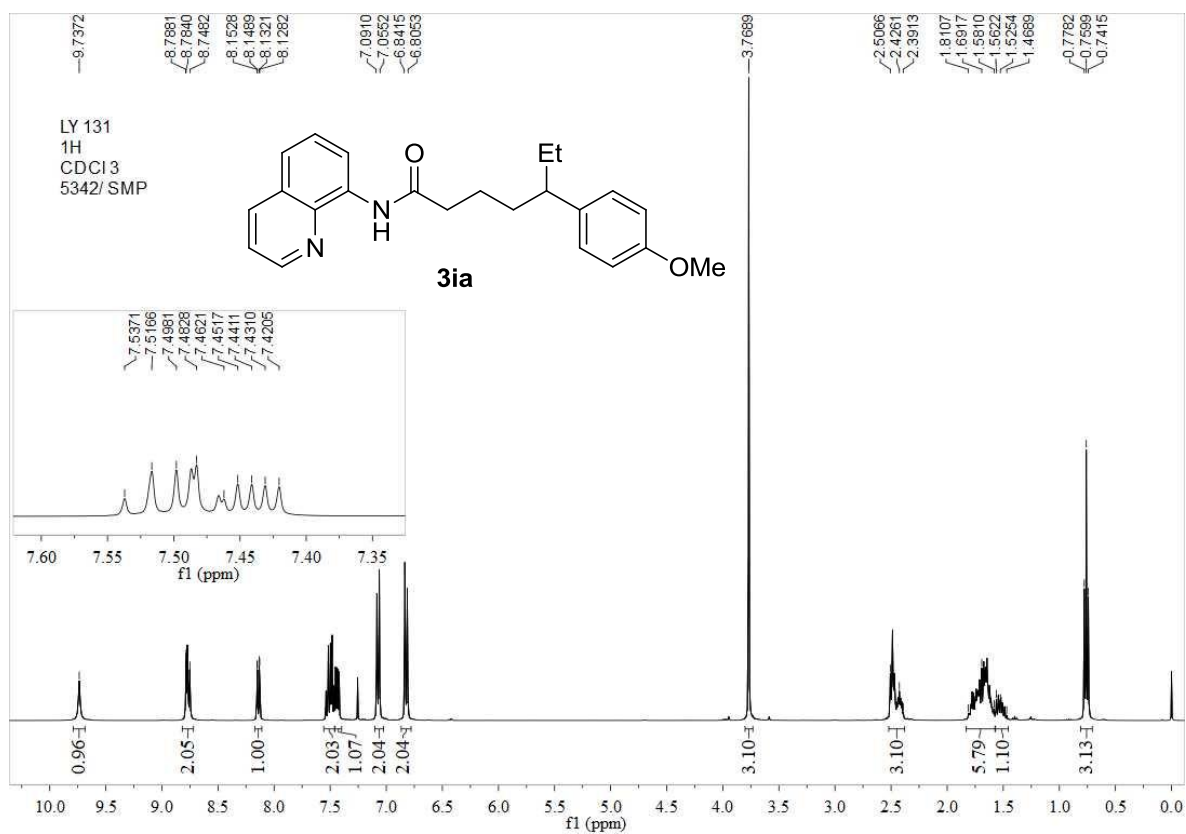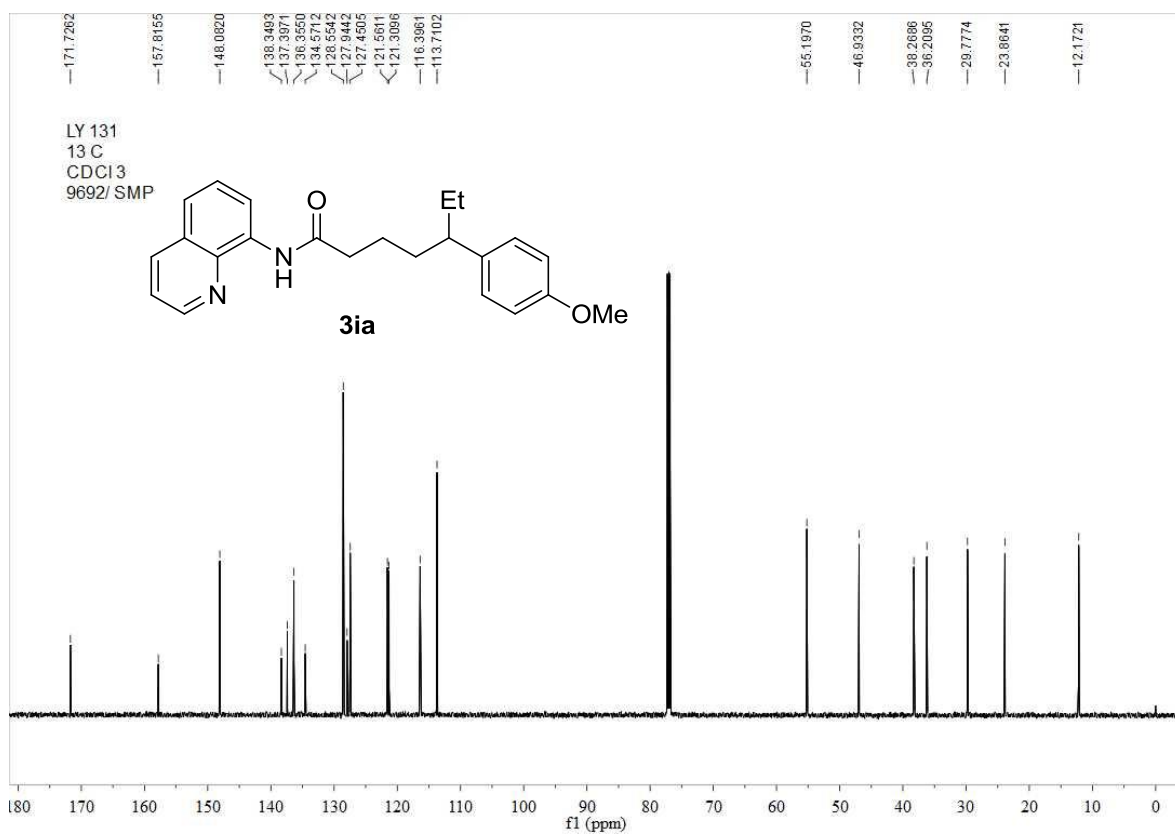

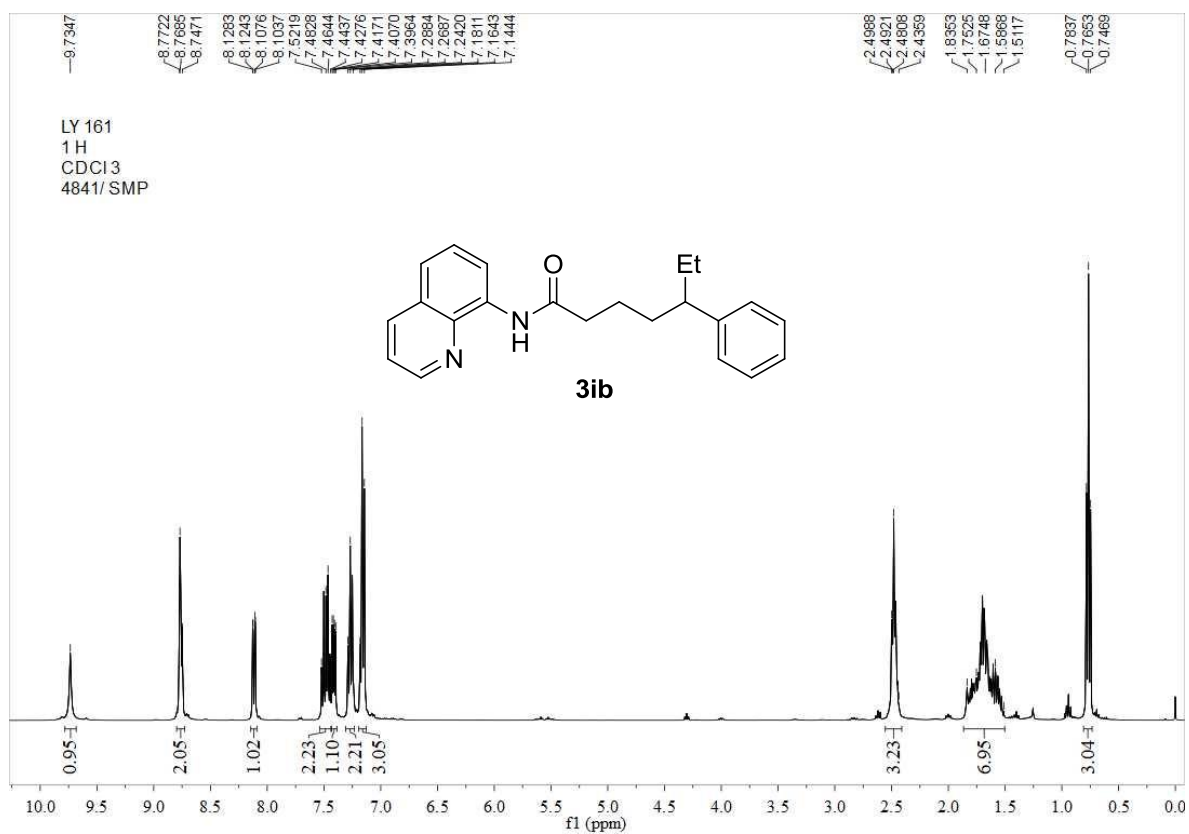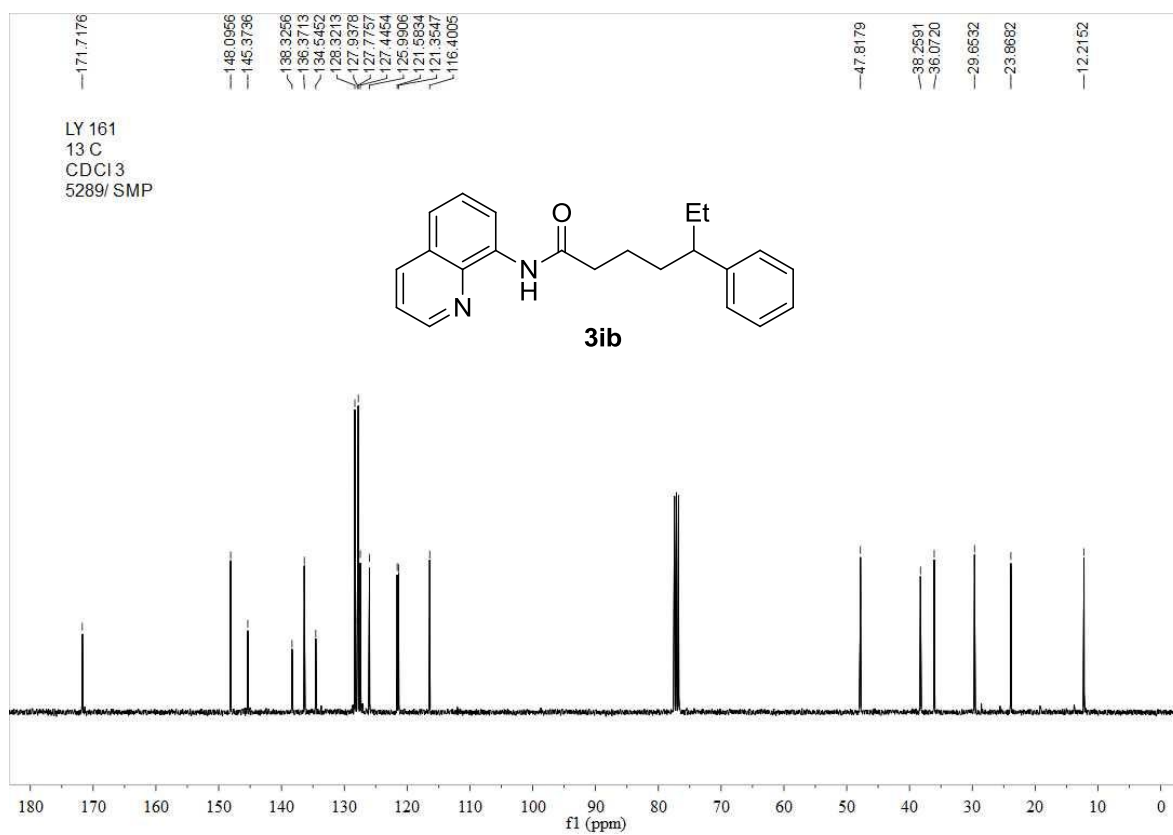

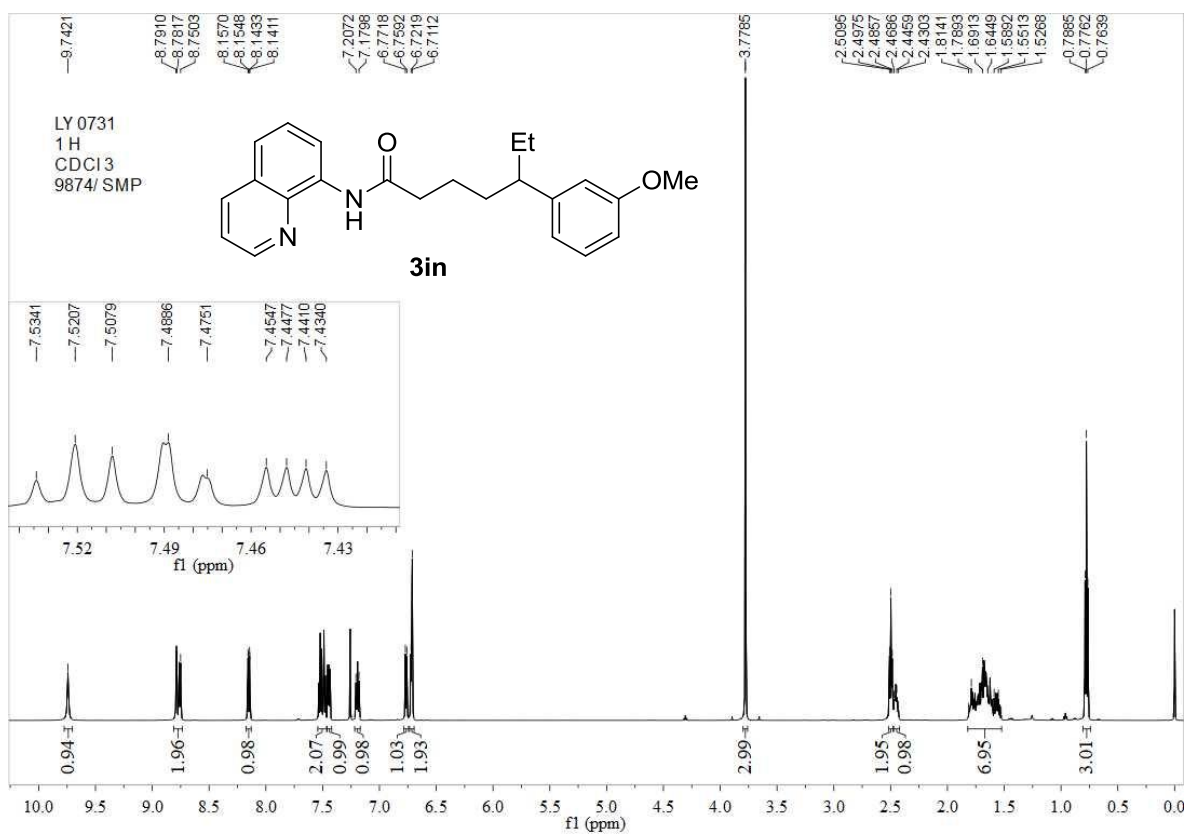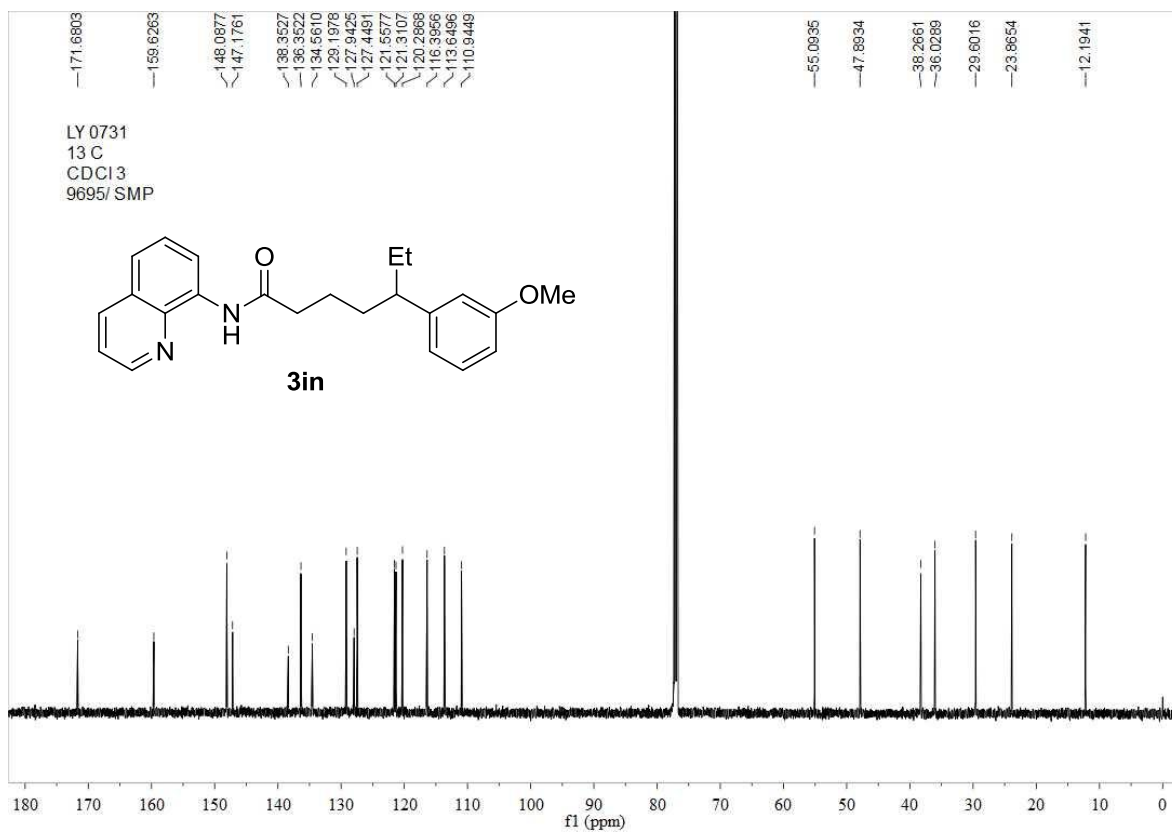

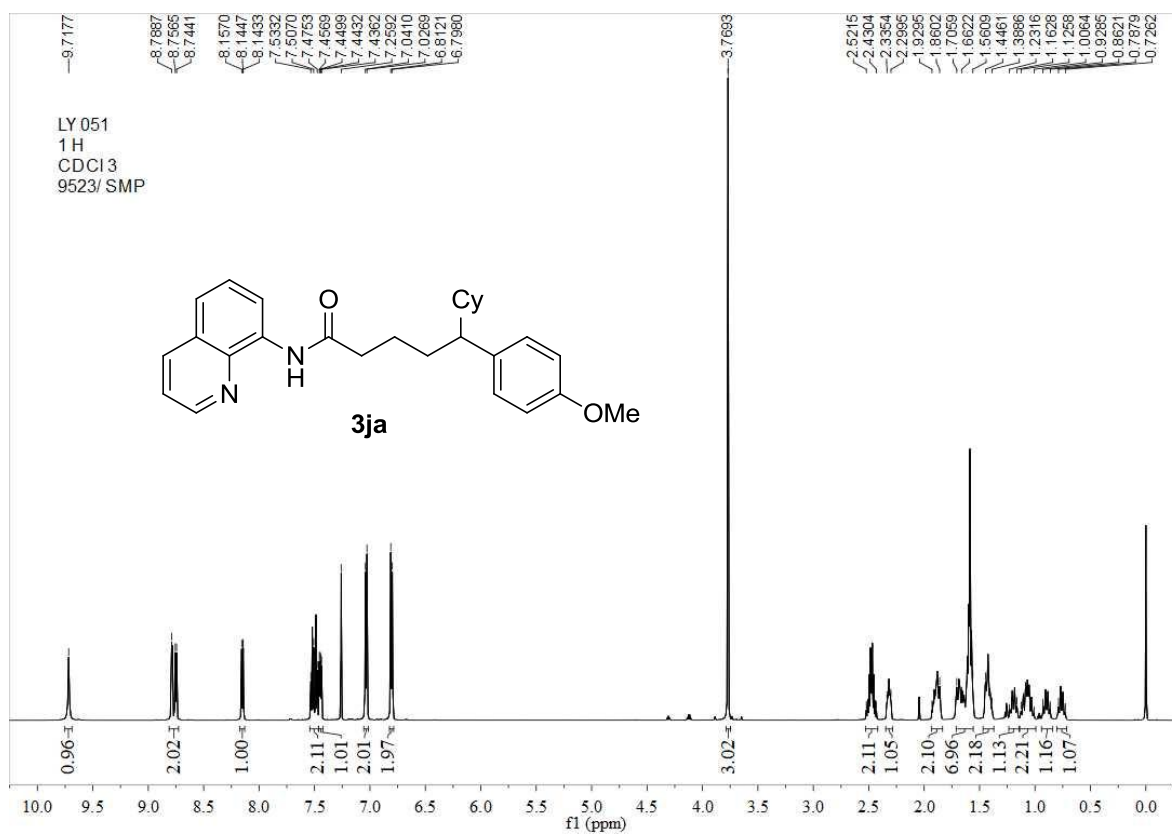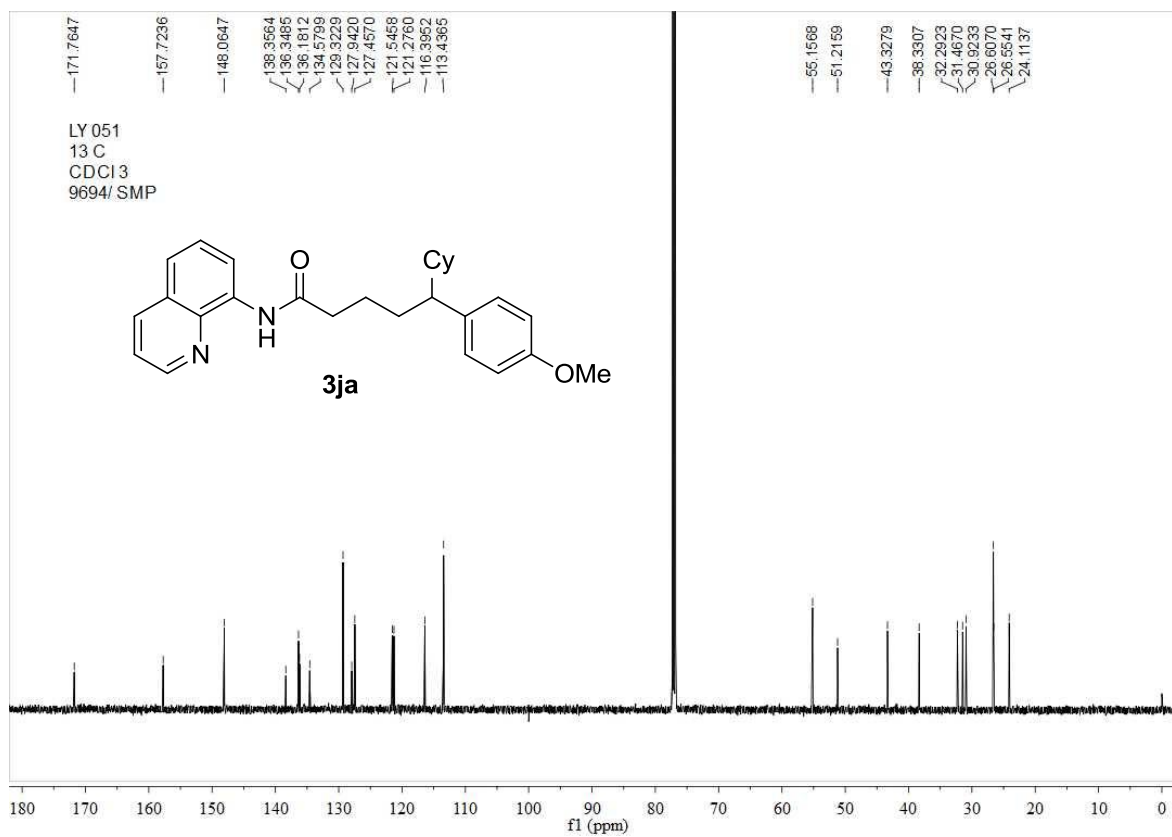

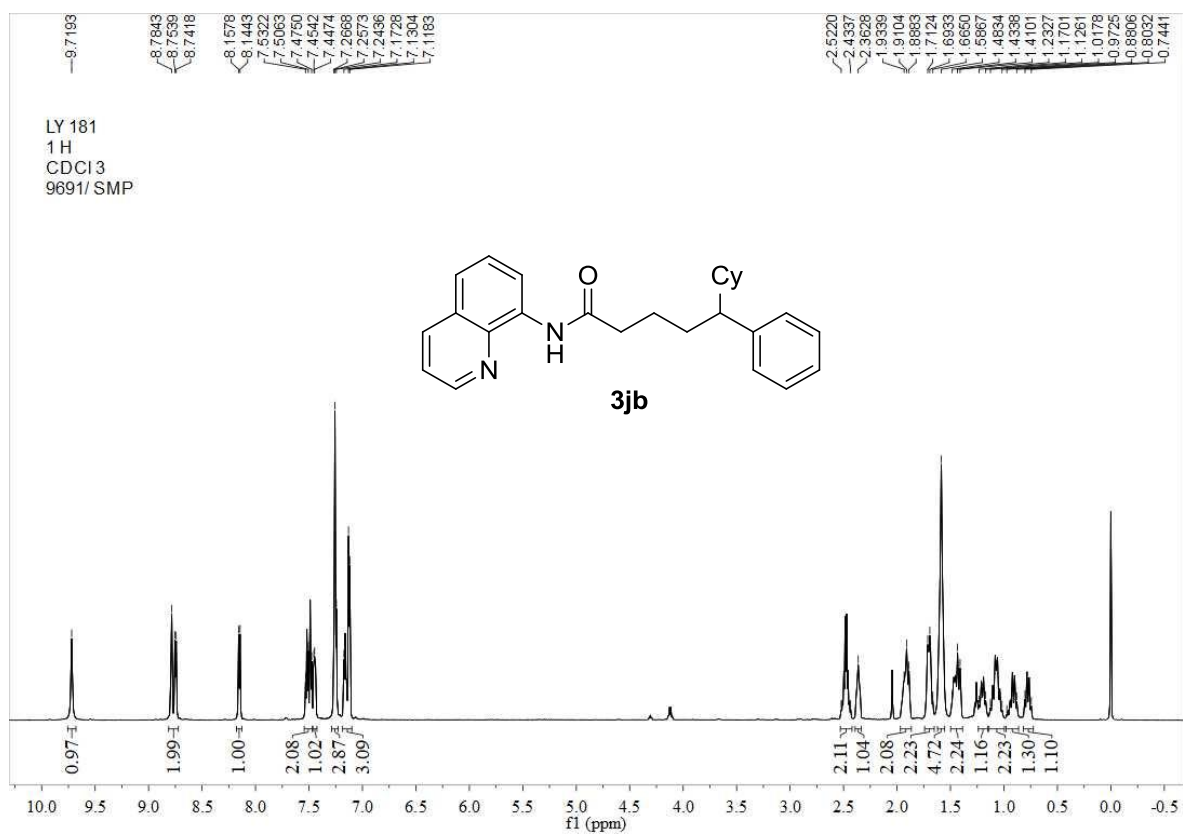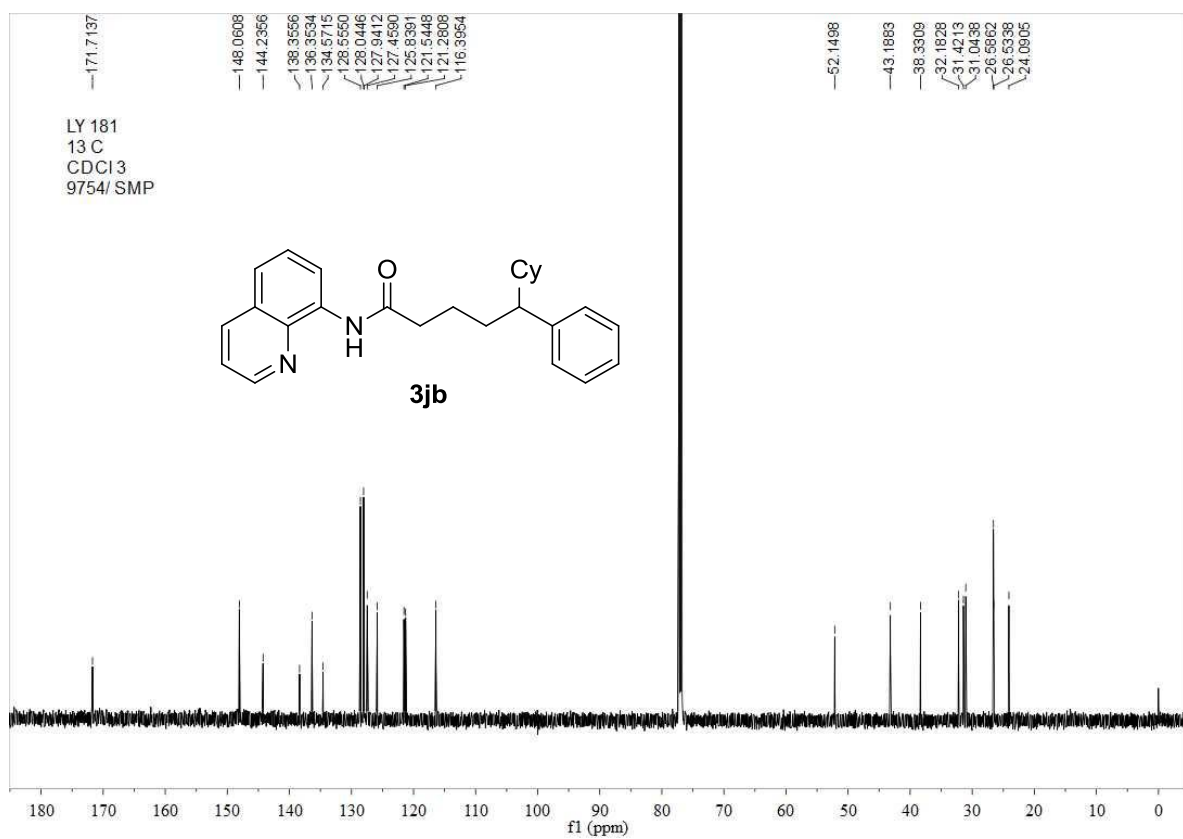



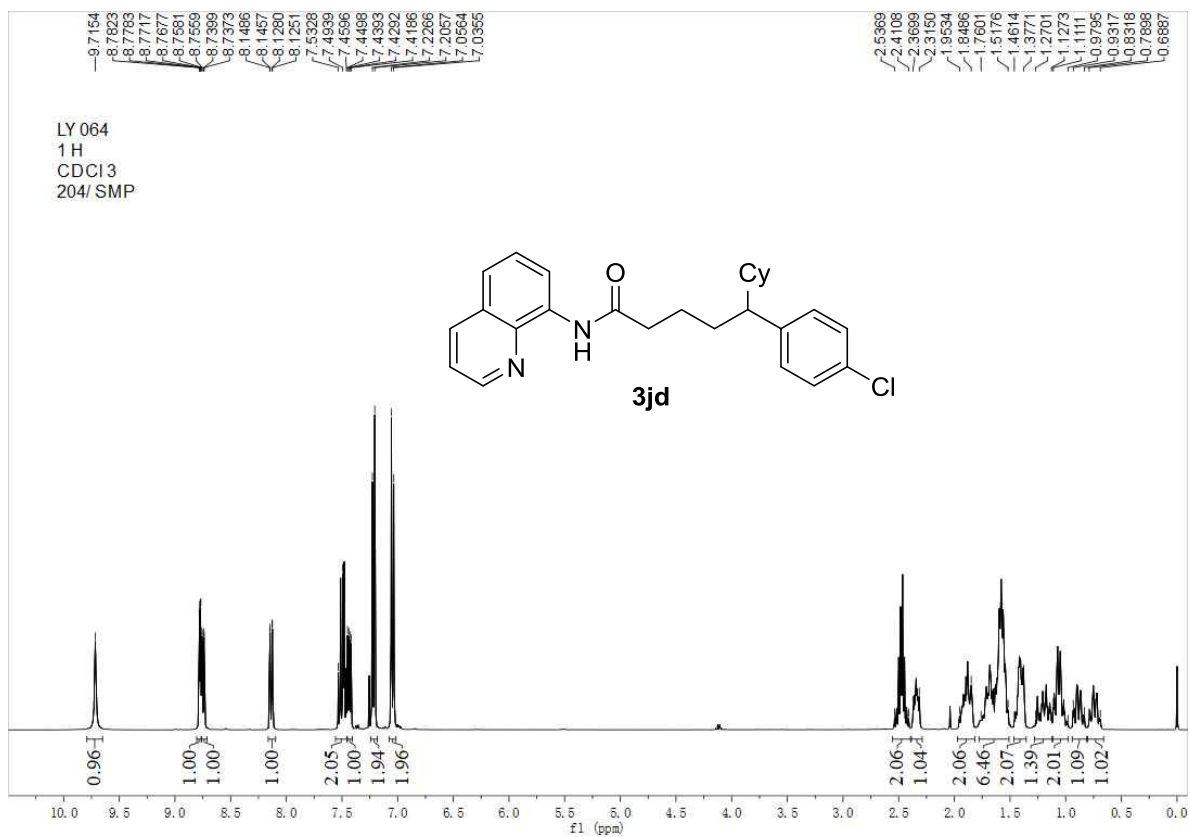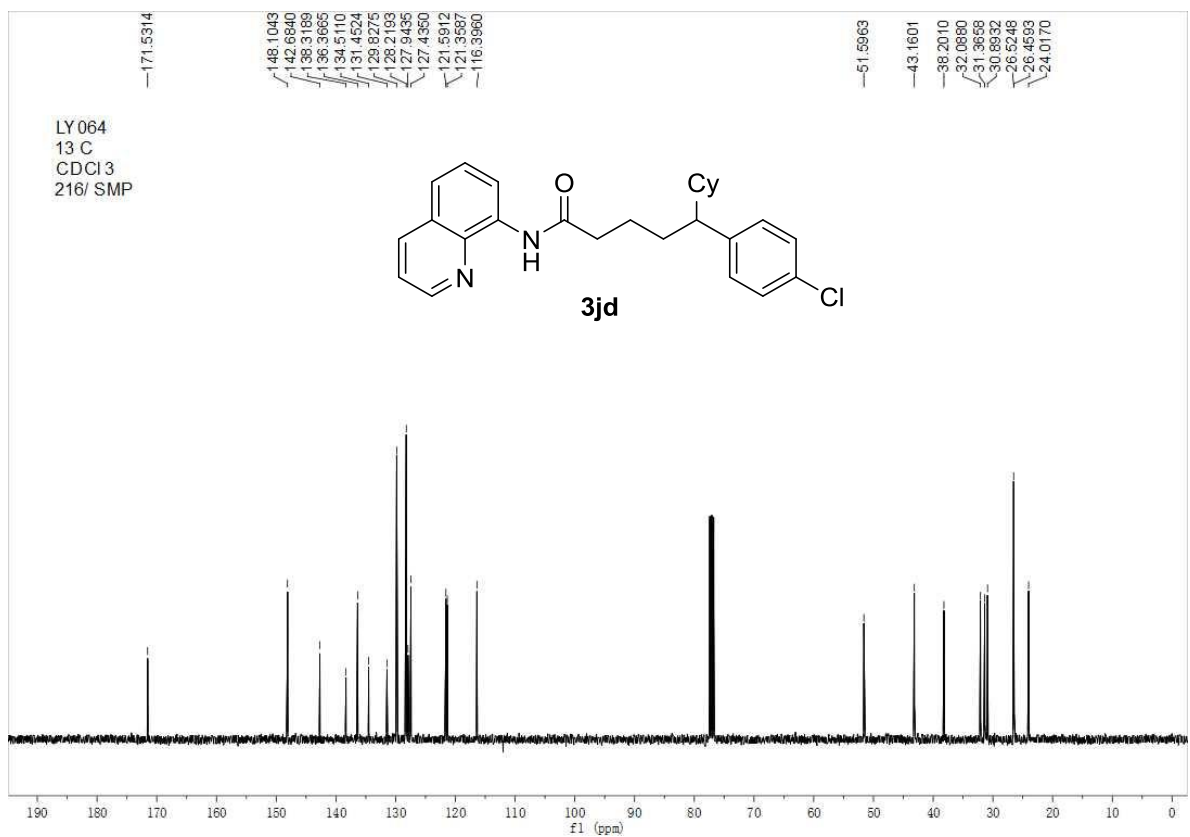

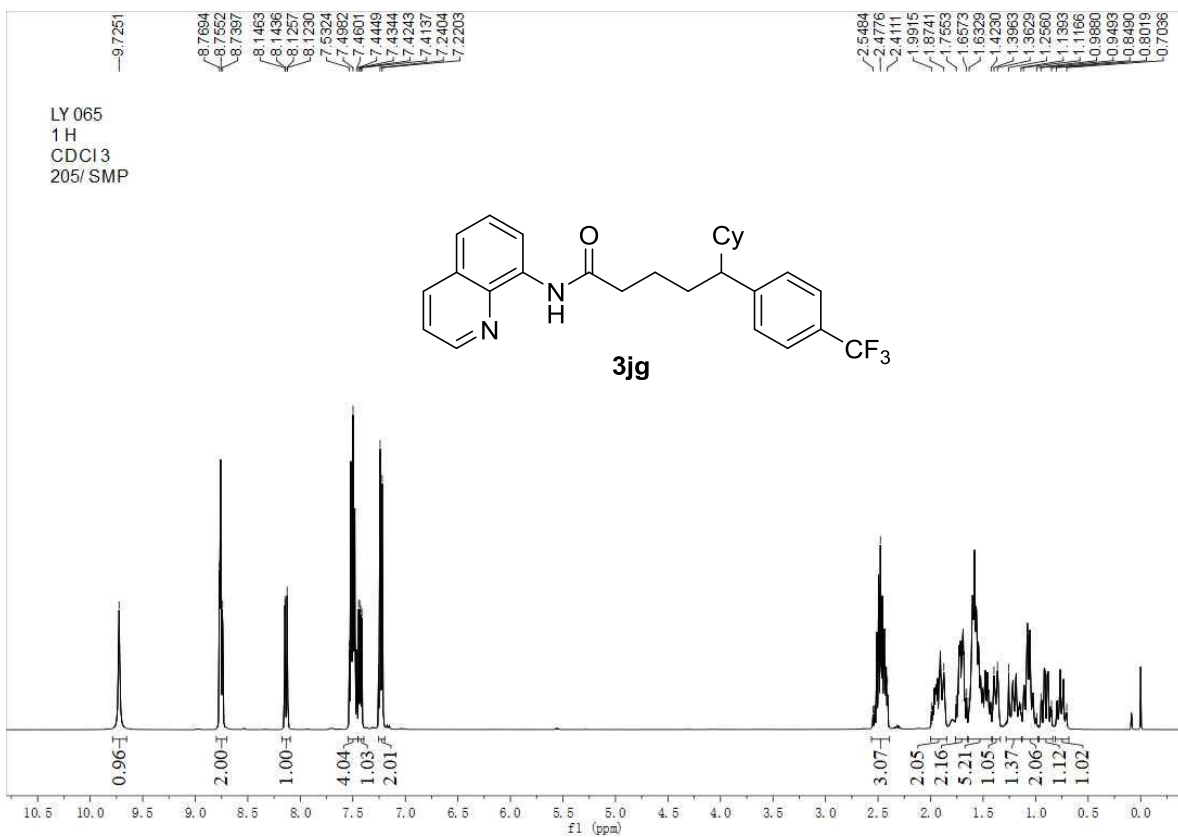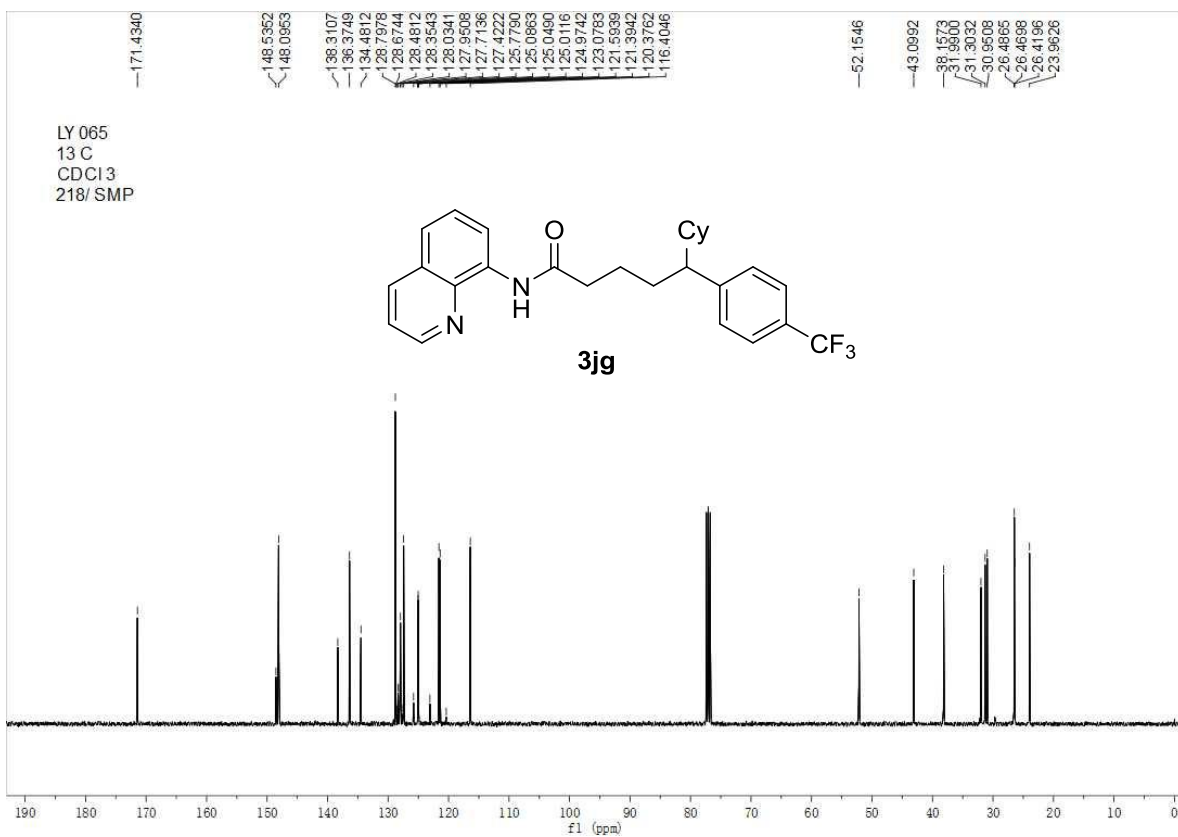

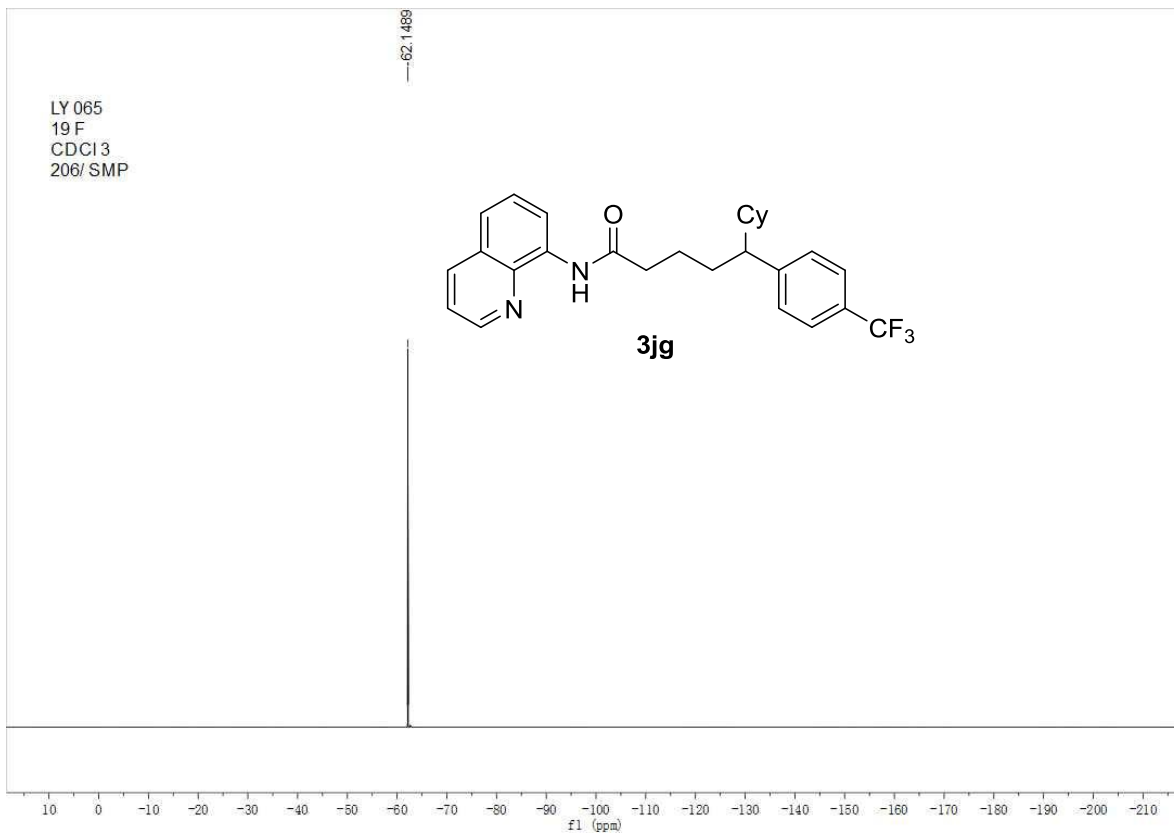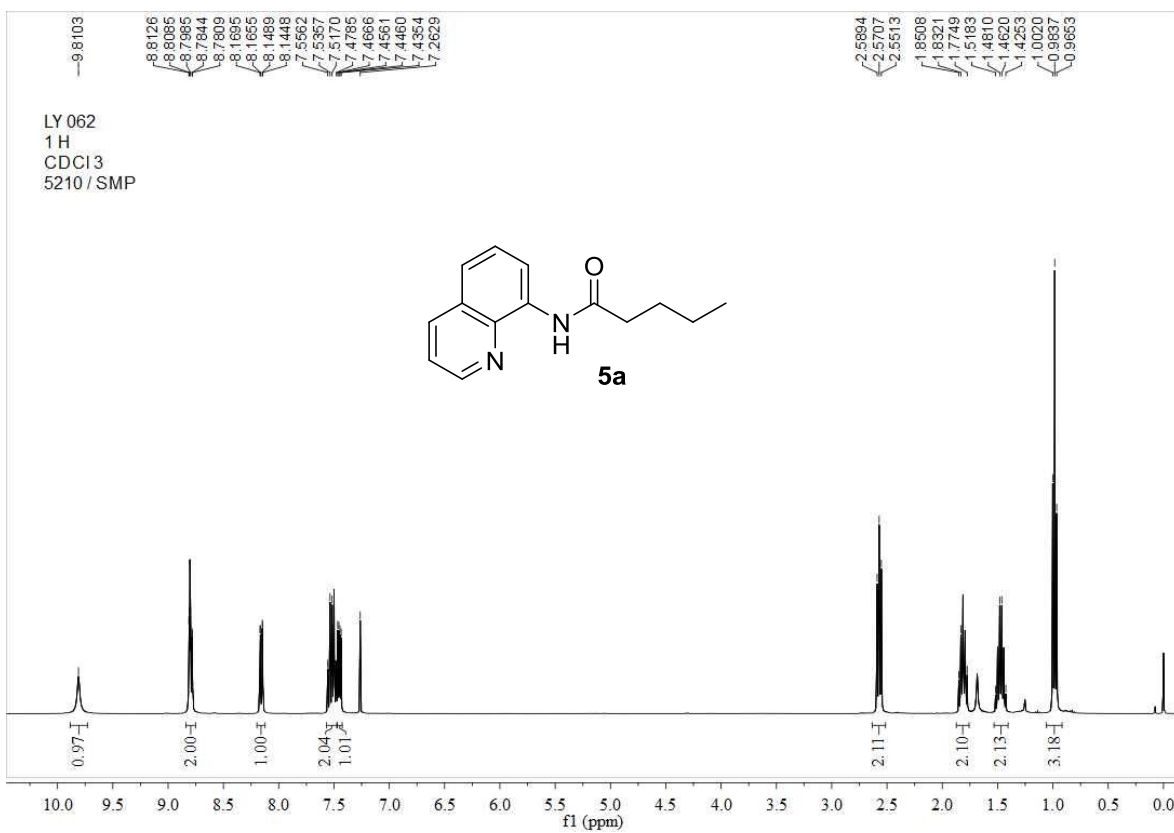

Supplement: d0qo00428f1.pdf [file d0qo00428f1.pdf]
